# Supplementary material
Source: Research Square preprint supplement (doi:10.21203/rs.3.rs-9363368/v1)
Supplement: Supplementary file 1 [file 071f1fc3cc21313f72de89a0.xlsx]

## Sheet: Supplementary Table S1
Supplementary Table S1: Basic Data Profile of 473 Gut Microbiota
id	reportedTrait
GCST90032270	CAG-273 sp003534295 abundance in stool
GCST90032271	CAG-274 sp000432155 abundance in stool
GCST90032272	CAG-302 abundance in stool
GCST90032273	CAG-345 sp000433315 abundance in stool
GCST90032274	CAG-345 abundance in stool
GCST90032275	CAG-349 abundance in stool
GCST90032276	CAG-390 sp003523225 abundance in stool
GCST90032277	CAG-433 abundance in stool
GCST90032278	CAG-448 sp000433415 abundance in stool
GCST90032279	CAG-448 sp003150135 abundance in stool
GCST90032280	CAG-448 abundance in stool
GCST90032281	CAG-449 abundance in stool
GCST90032282	CAG-452 sp000434035 abundance in stool
GCST90032283	CAG-452 abundance in stool
GCST90032284	CAG-465 sp000433135 abundance in stool
GCST90032285	CAG-475 abundance in stool
GCST90032286	CAG-485 sp002362485 abundance in stool
GCST90032287	CAG-485 sp002404675 abundance in stool
GCST90032288	CAG-488 sp000434055 abundance in stool
GCST90032289	CAG-488 abundance in stool
GCST90032290	CAG-495 abundance in stool
GCST90032291	CAG-510 sp002432425 abundance in stool
GCST90032292	CAG-552 abundance in stool
GCST90032293	CAG-590 sp000431135 abundance in stool
GCST90032294	CAG-632 abundance in stool
GCST90032295	CAG-698 abundance in stool
GCST90032296	CAG-776 sp000438195 abundance in stool
GCST90032297	CAG-776 abundance in stool
GCST90032298	CAG-81 sp000435795 abundance in stool
GCST90032299	CAG-822 sp000432855 abundance in stool
GCST90032300	CAG-822 abundance in stool
GCST90032301	CAG-826 abundance in stool
GCST90032302	CAG-83 sp000435555 abundance in stool
GCST90032303	CAG-83 sp002392625 abundance in stool
GCST90032304	CAG-841 sp002479075 abundance in stool
GCST90032305	CAG-873 sp001701165 abundance in stool
GCST90032306	CAG-877 sp000433455 abundance in stool
GCST90032307	CAG-877 abundance in stool
GCST90032308	CAG-882 sp003486385 abundance in stool
GCST90032309	CAG-884 sp000433875 abundance in stool
GCST90032310	CAG-884 abundance in stool
GCST90032311	CAG-977 abundance in stool
GCST90032312	Caloranaerobacteraceae abundance in stool
GCST90032313	Caloranaerobacter abundance in stool
GCST90032314	Campylobacter D abundance in stool
GCST90032315	Cetobacterium A abundance in stool
GCST90032316	CHKCI006 sp900018345 abundance in stool
GCST90032317	Chloroflexales abundance in stool
GCST90032318	Chromatiales abundance in stool
GCST90032319	Chromobacteriaceae abundance in stool
GCST90032320	Citrobacter A abundance in stool
GCST90032321	Clostridia abundance in stool
GCST90032322	Clostridium E sporosphaeroides abundance in stool
GCST90032323	Clostridium I abundance in stool
GCST90032324	Clostridium M clostridioforme abundance in stool
GCST90032325	Clostridium M sp001304855 abundance in stool
GCST90032326	Clostridium P abundance in stool
GCST90032327	Clostridium saudiense abundance in stool
GCST90032328	Clostridium S felsineum abundance in stool
GCST90032329	Clostridium tertium abundance in stool
GCST90032330	Collinsella abundance in stool
GCST90032331	Comamonas B abundance in stool
GCST90032332	Comamonas abundance in stool
GCST90032333	Coprobacillus cateniformis abundance in stool
GCST90032334	Coprobacillus abundance in stool
GCST90032335	Coprobacter secundus abundance in stool
GCST90032336	Corynebacterium abundance in stool
GCST90032337	Cyanobacteria abundance in stool
GCST90032338	Demequinaceae abundance in stool
GCST90032339	Demequina abundance in stool
GCST90032340	Desulfobacterota A abundance in stool
GCST90032341	Desulfovibrionaceae abundance in stool
GCST90032342	Desulfovibrionales abundance in stool
GCST90032343	Desulfovibrionia abundance in stool
GCST90032344	Desulfovibrio piger abundance in stool
GCST90032470	Massiliomicrobiota abundance in stool
GCST90032471	Megamonas funiformis abundance in stool
GCST90032472	Megamonas abundance in stool
GCST90032473	Megasphaera elsdenii abundance in stool
GCST90032474	Megasphaera sp900066485 abundance in stool
GCST90032475	Megasphaera abundance in stool
GCST90032476	Merdibacter massiliensis abundance in stool
GCST90032477	Methanobacterium B abundance in stool
GCST90032478	Methanobrevibacter B abundance in stool
GCST90032479	Microvirga abundance in stool
GCST90032480	Monoglobaceae abundance in stool
GCST90032481	Monoglobus pectinilyticus abundance in stool
GCST90032482	Monoglobus abundance in stool
GCST90032483	Morganella abundance in stool
GCST90032484	Mycobacteriaceae abundance in stool
GCST90032485	Mycoplasmataceae abundance in stool
GCST90032486	Mycoplasmatales abundance in stool
GCST90032487	Mycoplasmoidaceae abundance in stool
GCST90032488	Negativibacillus massiliensis abundance in stool
GCST90032489	Negativibacillus sp000435195 abundance in stool
GCST90032490	Negativibacillus abundance in stool
GCST90032491	NK4A144 abundance in stool
GCST90032492	Odoribacter laneus abundance in stool
GCST90032493	Olsenella C abundance in stool
GCST90032494	Omnitrophota abundance in stool
GCST90032445	Klebsiella A abundance in stool
GCST90032446	Klebsiella pneumoniae abundance in stool
GCST90032447	Klebsiella abundance in stool
GCST90032448	koll11 abundance in stool
GCST90032449	Lachnoanaerobaculum saburreum abundance in stool
GCST90032450	Lachnospiraceae abundance in stool
GCST90032451	Lachnospirales abundance in stool
GCST90032452	Lachnospira rogosae abundance in stool
GCST90032453	Lachnospira sp000437735 abundance in stool
GCST90032454	Lactobacillus B ruminis abundance in stool
GCST90032455	Lactobacillus B salivarius abundance in stool
GCST90032456	Lactobacillus B abundance in stool
GCST90032457	Lactococcus lactis abundance in stool
GCST90032458	Lawsonibacter sp000492175 abundance in stool
GCST90032459	Lawsonibacter sp002161175 abundance in stool
GCST90032460	Lawsonibacter sp900066645 abundance in stool
GCST90032461	Leclercia abundance in stool
GCST90032462	Lentimicrobiaceae abundance in stool
GCST90032463	Leptospirae abundance in stool
GCST90032464	Leptospirales abundance in stool
GCST90032465	Leuconostoc mesenteroides abundance in stool
GCST90032466	Leuconostoc abundance in stool
GCST90032467	Magnetospirillum A abundance in stool
GCST90032468	Marinilabiliaceae abundance in stool
GCST90032469	Massiliomicrobiota sp002160815 abundance in stool
GCST90032505	Pararhizobium abundance in stool
GCST90032506	Pauljensenia sp000411415 abundance in stool
GCST90032507	Peptococcia abundance in stool
GCST90032508	Phascolarctobacterium sp003150755 abundance in stool
GCST90032509	Phocea massiliensis abundance in stool
GCST90032510	Phocea abundance in stool
GCST90032511	Photobacterium abundance in stool
GCST90032512	Planococcaceae abundance in stool
GCST90032513	Poseidoniaceae abundance in stool
GCST90032514	Prevotella bivia abundance in stool
GCST90032515	Prevotella buccae abundance in stool
GCST90032516	Prevotellamassilia sp000437675 abundance in stool
GCST90032517	Prevotellamassilia abundance in stool
GCST90032495	Paceibacteria abundance in stool
GCST90032496	Paenibacillales abundance in stool
GCST90032497	Paenibacillus J abundance in stool
GCST90032498	Pandoraea abundance in stool
GCST90032499	Parabacteroides johnsonii abundance in stool
GCST90032500	Parabacteroides sp000436495 abundance in stool
GCST90032501	Parabacteroides abundance in stool
GCST90032502	Parachlamydiales abundance in stool
GCST90032503	Paraglaciecola abundance in stool
GCST90032504	Paramuribaculum sp001689565 abundance in stool
GCST90032195	Atopobiaceae abundance in stool
GCST90032196	Aureimonas abundance in stool
GCST90032197	Azorhizobium abundance in stool
GCST90032198	Bacillaceae A abundance in stool
GCST90032199	Bacillales A abundance in stool
GCST90032200	Bacilli A abundance in stool
GCST90032201	Bacillus AY abundance in stool
GCST90032202	Bacillus C abundance in stool
GCST90032203	Bacillus abundance in stool
GCST90032204	Bacillus U abundance in stool
GCST90032205	Bacillus velezensis abundance in stool
GCST90032206	Bacteroides A plebeius A abundance in stool
GCST90032207	Bacteroides A plebeius abundance in stool
GCST90032208	Bacteroides A abundance in stool
GCST90032209	Bacteroides clarus abundance in stool
GCST90032210	Bacteroides eggerthii abundance in stool
GCST90032211	Bacteroides faecis abundance in stool
GCST90032212	Bacteroides intestinalis A abundance in stool
GCST90032213	Bacteroides sp002160055 abundance in stool
GCST90032214	Bacteroides sp003545565 abundance in stool
GCST90032215	Bacteroides stercoris abundance in stool
GCST90032216	Bacteroides thetaiotaomicron abundance in stool
GCST90032217	Barnesiellaceae abundance in stool
GCST90032218	Barnesiella abundance in stool
GCST90032219	Bifidobacteriaceae abundance in stool
GCST90032245	Brevibacillaceae abundance in stool
GCST90032246	Brevibacillales abundance in stool
GCST90032247	Brevibacillus B abundance in stool
GCST90032248	Butyricimonas sp900258545 abundance in stool
GCST90032249	CAG-1000 sp000434555 abundance in stool
GCST90032250	CAG-1000 abundance in stool
GCST90032251	CAG-1031 abundance in stool
GCST90032252	CAG-110 abundance in stool
GCST90032253	CAG-145 sp000435615 abundance in stool
GCST90032254	CAG-145 sp002320005 abundance in stool
GCST90032255	CAG-145 abundance in stool
GCST90032256	CAG-170 sp003516765 abundance in stool
GCST90032257	CAG-177 sp002438685 abundance in stool
GCST90032258	CAG-177 sp002451755 abundance in stool
GCST90032259	CAG-177 sp003514385 abundance in stool
GCST90032260	CAG-177 sp003538135 abundance in stool
GCST90032261	CAG-177 abundance in stool
GCST90032262	CAG-180 sp000432435 abundance in stool
GCST90032263	CAG-194 sp002441865 abundance in stool
GCST90032264	CAG-245 sp000435175 abundance in stool
GCST90032265	CAG-245 abundance in stool
GCST90032266	CAG-269 sp001915995 abundance in stool
GCST90032267	CAG-269 sp001916065 abundance in stool
GCST90032268	CAG-269 sp002372935 abundance in stool
GCST90032269	CAG-273 sp003507395 abundance in stool
GCST90032220	Bifidobacterium adolescentis abundance in stool
GCST90032221	Bifidobacterium angulatum abundance in stool
GCST90032222	Bifidobacterium bifidum abundance in stool
GCST90032223	Bifidobacterium breve abundance in stool
GCST90032224	Bifidobacterium catenulatum abundance in stool
GCST90032225	Bifidobacterium infantis abundance in stool
GCST90032226	Bifidobacterium kashiwanohense abundance in stool
GCST90032227	Bifidobacterium longum abundance in stool
GCST90032228	Bifidobacterium pseudocatenulatum abundance in stool
GCST90032229	Bifidobacterium ruminantium abundance in stool
GCST90032230	Bifidobacterium abundance in stool
GCST90032231	Bin127 abundance in stool
GCST90032232	Blautia A sp000285855 abundance in stool
GCST90032233	Blautia A sp002159835 abundance in stool
GCST90032234	Blautia A sp900066145 abundance in stool
GCST90032235	Blautia A sp900066355 abundance in stool
GCST90032236	Blautia hansenii abundance in stool
GCST90032237	Blautia sp000436935 abundance in stool
GCST90032238	Blautia sp001304935 abundance in stool
GCST90032239	Borreliaceae abundance in stool
GCST90032240	Borreliales abundance in stool
GCST90032241	Brachyspiraceae abundance in stool
GCST90032242	Brachyspirae abundance in stool
GCST90032243	Brachyspirales abundance in stool
GCST90032244	Brachyspira abundance in stool
GCST90032618	UBA6382 abundance in stool
GCST90032619	UBA6398 sp002451695 abundance in stool
GCST90032620	UBA6398 abundance in stool
GCST90032621	UBA644 abundance in stool
GCST90032622	UBA6960 abundance in stool
GCST90032623	UBA7102 sp002315655 abundance in stool
GCST90032624	UBA7177 sp002491225 abundance in stool
GCST90032625	UBA7177 abundance in stool
GCST90032626	UBA7182 sp002491115 abundance in stool
GCST90032627	UBA7182 abundance in stool
GCST90032628	UBA737 sp002451855 abundance in stool
GCST90032629	UBA737 abundance in stool
GCST90032630	UBA7703 abundance in stool
GCST90032631	UBA7748 sp900314535 abundance in stool
GCST90032632	UBA8517 abundance in stool
GCST90032633	UBA8621 abundance in stool
GCST90032634	UBA8904 abundance in stool
GCST90032635	UBA9475 sp002161235 abundance in stool
GCST90032636	UBA9475 sp002161675 abundance in stool
GCST90032637	UBP9 abundance in stool
GCST90032638	UCG-010 sp003150215 abundance in stool
GCST90032639	UNC496MF abundance in stool
GCST90032640	V9D3004 abundance in stool
GCST90032641	Veillonellaceae abundance in stool
GCST90032642	Veillonella rogosae abundance in stool
GCST90032643	Veillonella abundance in stool
GCST90032644	Victivallis sp002998355 abundance in stool
GCST90032172	Absiella dolichum abundance in stool
GCST90032173	Acetobacteraceae abundance in stool
GCST90032174	Acetobacterales abundance in stool
GCST90032175	Achromobacter abundance in stool
GCST90032176	Acidaminococcus fermentans abundance in stool
GCST90032177	Acidaminococcus sp900315205 abundance in stool
GCST90032178	Acidobacteriales abundance in stool
GCST90032179	Actinobacteria abundance in stool
GCST90032180	Actinobacteriota abundance in stool
GCST90032181	Actinomycetales abundance in stool
GCST90032182	Agathobacter sp000434275 abundance in stool
GCST90032183	Akkermansia muciniphila B abundance in stool
GCST90032184	Aliivibrio abundance in stool
GCST90032185	Alistipes shahii abundance in stool
GCST90032186	Alistipes abundance in stool
GCST90032187	Alloprevotella abundance in stool
GCST90032188	Alteromonadaceae abundance in stool
GCST90032189	An181 abundance in stool
GCST90032190	An7 abundance in stool
GCST90032191	Anaeromassilibacillus sp001305115 abundance in stool
GCST90032192	Aneurinibacillaceae abundance in stool
GCST90032193	Aneurinibacillales abundance in stool
GCST90032194	AR31 abundance in stool
GCST90032543	RUG147 sp900315495 abundance in stool
GCST90032550	Ruminococcus D bicirculans abundance in stool
GCST90032551	Ruminococcus D abundance in stool
GCST90032552	Ruminococcus E sp003521625 abundance in stool
GCST90032553	Ruminococcus E sp900100595 abundance in stool
GCST90032554	Ruminococcus E sp900314705 abundance in stool
GCST90032555	Ruminococcus abundance in stool
GCST90032560	Sorangium abundance in stool
GCST90032561	Spirillospora abundance in stool
GCST90032562	Spirochaetia abundance in stool
GCST90032563	Sporomusales abundance in stool
GCST90032544	RUG147 abundance in stool
GCST90032545	RUG420 sp900317985 abundance in stool
GCST90032546	RUG472 sp900319345 abundance in stool
GCST90032547	RUG472 abundance in stool
GCST90032548	Ruminococcus A sp000432335 abundance in stool
GCST90032549	Ruminococcus C sp000437255 abundance in stool
GCST90032556	Saccharofermentanaceae abundance in stool
GCST90032557	Saccharomonospora abundance in stool
GCST90032558	SAR324 abundance in stool
GCST90032559	SM23-33 abundance in stool
GCST90032564	Staphylococcus A fleurettii abundance in stool
GCST90032565	Staphylococcus aureus abundance in stool
GCST90032566	Stappia abundance in stool
GCST90032567	Streptacidiphilus abundance in stool
GCST90032568	Streptococcus sanguinis abundance in stool
GCST90032569	Succiniclasticum abundance in stool
GCST90032570	Succinivibrionaceae abundance in stool
GCST90032571	Succinivibrio abundance in stool
GCST90032572	Syntrophomonadia abundance in stool
GCST90032573	Syntrophorhabdaceae abundance in stool
GCST90032574	Syntrophorhabdia abundance in stool
GCST90032575	Tannerellaceae abundance in stool
GCST90032576	Tepidanaerobacteraceae abundance in stool
GCST90032577	Terrisporobacter othiniensis abundance in stool
GCST90032578	Terrisporobacter abundance in stool
GCST90032579	Thermococcaceae abundance in stool
GCST90032580	Thermococci abundance in stool
GCST90032581	Thermoplasmatota abundance in stool
GCST90032582	Thermoprotei abundance in stool
GCST90032583	Thioalkalivibrionaceae abundance in stool
GCST90032584	TMED109 abundance in stool
GCST90032585	Treponema D abundance in stool
GCST90032586	Treponemataceae abundance in stool
GCST90032587	Turicibacteraceae abundance in stool
GCST90032588	Turicibacter sp001543345 abundance in stool
GCST90032589	Turicibacter abundance in stool
GCST90032590	UBA1033 sp001695555 abundance in stool
GCST90032591	UBA1066 sp900317515 abundance in stool
GCST90032592	UBA1066 abundance in stool
GCST90032593	UBA11471 sp000434215 abundance in stool
GCST90032594	UBA11471 abundance in stool
GCST90032595	UBA1191 abundance in stool
GCST90032596	UBA11963 sp002362595 abundance in stool
GCST90032597	UBA11963 abundance in stool
GCST90032598	UBA1206 sp000433115 abundance in stool
GCST90032599	UBA1375 sp002305795 abundance in stool
GCST90032600	UBA1407 abundance in stool
GCST90032601	UBA1409 abundance in stool
GCST90032602	UBA1417 sp003531055 abundance in stool
GCST90032603	UBA1446 sp002329245 abundance in stool
GCST90032604	UBA1448 sp002329405 abundance in stool
GCST90032605	UBA1448 abundance in stool
GCST90032606	UBA1611 abundance in stool
GCST90032607	UBA1777 sp002320035 abundance in stool
GCST90032608	UBA1777 sp900316255 abundance in stool
GCST90032609	UBA1777 sp900319275 abundance in stool
GCST90032610	UBA1777 sp900319835 abundance in stool
GCST90032611	UBA2658 sp002841545 abundance in stool
GCST90032612	UBA2821 abundance in stool
GCST90032613	UBA2922 sp900313925 abundance in stool
GCST90032614	UBA3282 sp002493835 abundance in stool
GCST90032615	UBA3792 abundance in stool
GCST90032616	UBA3855 sp900316885 abundance in stool
GCST90032617	UBA5394 sp002409725 abundance in stool
GCST90032519	Prevotella sp000436915 abundance in stool
GCST90032520	Prevotella sp002437285 abundance in stool
GCST90032521	Prevotella sp002437565 abundance in stool
GCST90032522	Prevotella sp002933775 abundance in stool
GCST90032523	Prevotella sp900317685 abundance in stool
GCST90032524	Prevotella sp900318625 abundance in stool
GCST90032525	Propionibacterium freudenreichii abundance in stool
GCST90032526	Proteus abundance in stool
GCST90032527	Provencibacterium massiliense abundance in stool
GCST90032528	Provencibacterium abundance in stool
GCST90032529	Providencia abundance in stool
GCST90032530	Pseudomonadales abundance in stool
GCST90032531	Pseudomonas aeruginosa abundance in stool
GCST90032532	Psychroserpens abundance in stool
GCST90032533	QALR01 sp003150035 abundance in stool
GCST90032534	Raoultella abundance in stool
GCST90032535	RC9 sp900317925 abundance in stool
GCST90032536	Rhodanobacter abundance in stool
GCST90032537	Rhodococcus abundance in stool
GCST90032538	Rhodovulum abundance in stool
GCST90032539	Romboutsia ilealis abundance in stool
GCST90032540	Roseibacillus abundance in stool
GCST90032541	Rubneribacter sp002159915 abundance in stool
GCST90032542	RUG013 sp001486445 abundance in stool
GCST90032518	Prevotella sp000434975 abundance in stool
GCST90032370	Escherichia abundance in stool
GCST90032371	Eubacterium callanderi abundance in stool
GCST90032372	Eubacterium F sp000434115 abundance in stool
GCST90032373	Eubacterium I ramulus A abundance in stool
GCST90032374	Eubacterium Q abundance in stool
GCST90032375	Eubacterium R coprostanoligenes abundance in stool
GCST90032376	Eubacterium R sp000431535 abundance in stool
GCST90032377	Ezakiellaceae abundance in stool
GCST90032378	F0428 abundance in stool
GCST90032379	Faecalibacterium prausnitzii E abundance in stool
GCST90032380	Faecalibacterium sp002160895 abundance in stool
GCST90032381	Faecalicatena glycyrrhizinilyticum abundance in stool
GCST90032382	Faecalicatena lactaris abundance in stool
GCST90032383	Faecalicatena sp000364245 abundance in stool
GCST90032384	Faecalicatena sp001517425 abundance in stool
GCST90032385	Faecalicatena sp002161355 abundance in stool
GCST90032386	Faecalicatena sp002397985 abundance in stool
GCST90032387	Faecalicatena torques abundance in stool
GCST90032388	Faecalicoccus pleomorphus abundance in stool
GCST90032389	Faecalicoccus abundance in stool
GCST90032390	Faecalitalea cylindroides abundance in stool
GCST90032391	Fervidobacteriaceae abundance in stool
GCST90032392	Fibrobacteraceae abundance in stool
GCST90032393	Fibrobacterales abundance in stool
GCST90032394	Fibrobacteria abundance in stool
GCST90032345	Dialister sp000434475 abundance in stool
GCST90032346	Dokdonella abundance in stool
GCST90032347	Dorea phocaeense abundance in stool
GCST90032348	Dorea abundance in stool
GCST90032349	DTU024 sp002411105 abundance in stool
GCST90032350	Dysgonomonadaceae abundance in stool
GCST90032351	Eisenbergiella sp900066775 abundance in stool
GCST90032352	Elusimicrobiaceae abundance in stool
GCST90032353	Elusimicrobia abundance in stool
GCST90032354	Elusimicrobiota abundance in stool
GCST90032355	Emergencia abundance in stool
GCST90032356	Endozoicomonadaceae abundance in stool
GCST90032357	Enorma massiliensis abundance in stool
GCST90032358	Ensifer abundance in stool
GCST90032359	Enterobacteriaceae abundance in stool
GCST90032360	Enterococcaceae abundance in stool
GCST90032361	Enterococcus A abundance in stool
GCST90032362	Enterococcus B abundance in stool
GCST90032363	Enterococcus faecalis abundance in stool
GCST90032364	Enterococcus abundance in stool
GCST90032365	Enteroscipio abundance in stool
GCST90032366	ER4 sp002437735 abundance in stool
GCST90032367	Eremiobacterota abundance in stool
GCST90032368	Erysipelatoclostridiaceae abundance in stool
GCST90032369	Escherichia flexneri abundance in stool
GCST90032395	Fimbriimonadia abundance in stool
GCST90032396	Firmicutes A abundance in stool
GCST90032397	Firmicutes E abundance in stool
GCST90032398	Firmicutes I abundance in stool
GCST90032399	Flavobacteriales abundance in stool
GCST90032400	Flavonifractor sp002159265 abundance in stool
GCST90032401	Flavonifractor sp900199495 abundance in stool
GCST90032402	Fournierella massiliensis abundance in stool
GCST90032403	Francisellaceae abundance in stool
GCST90032404	Francisellales abundance in stool
GCST90032405	Fusobacteriaceae abundance in stool
GCST90032406	Fusobacterium A abundance in stool
GCST90032407	GCA-900066135 sp900066135 abundance in stool
GCST90032408	GCA-900066495 sp900066495 abundance in stool
GCST90032409	GCA-900066495 abundance in stool
GCST90032410	GCA-900066575 sp900066385 abundance in stool
GCST90032411	GCA-900066755 sp900066755 abundance in stool
GCST90032412	GCA-900066755 abundance in stool
GCST90032413	GCA-900199385 sp900320755 abundance in stool
GCST90032414	Geminocystis abundance in stool
GCST90032415	Gemmatimonadaceae abundance in stool
GCST90032416	Geobacteraceae abundance in stool
GCST90032417	Geobacter C abundance in stool
GCST90032418	Gillisia abundance in stool
GCST90032419	Gluconobacter abundance in stool
GCST90032420	Gordonibacter pamelaeae abundance in stool
GCST90032421	Gordonibacter abundance in stool
GCST90032422	Gramella abundance in stool
GCST90032423	Haemophilus D sp001679485 abundance in stool
GCST90032424	Halarcobacter abundance in stool
GCST90032425	Halomonadaceae abundance in stool
GCST90032426	Haloplasmatales abundance in stool
GCST90032427	Helicobacter abundance in stool
GCST90032428	Herbidospora abundance in stool
GCST90032429	Herbinix abundance in stool
GCST90032430	Holdemania massiliensis abundance in stool
GCST90032431	Holdemania sp900120005 abundance in stool
GCST90032432	Holdemania abundance in stool
GCST90032433	Hungatella sp900155545 abundance in stool
GCST90032434	Hydrogenophaga abundance in stool
GCST90032435	Hyphomonas abundance in stool
GCST90032436	Intestinimonas massiliensis abundance in stool
GCST90032437	Jiangellaceae abundance in stool
GCST90032438	Johnsonella ignava abundance in stool
GCST90032439	K10 sp001941205 abundance in stool
GCST90032440	K10 abundance in stool
GCST90032441	Kandleria vitulina abundance in stool
GCST90032442	Kineothrix abundance in stool
GCST90032443	KLE1615 sp900066985 abundance in stool
GCST90032444	KLE1615 abundance in stool

## Sheet: Supplementary Table S2
Supplementary Table S2: Instrumental variables for gut microbiota associated with osteoarthritis
id	SNP	effect_allele.exposure	other_allele.exposure	effect_allele.outcome	other_allele.outcome	beta.exposure	beta.outcome	eaf.exposure	eaf.outcome	remove	palindromic	ambiguous	id.outcome	se.outcome	pval.outcome	outcome	mr_keep.outcome	pval_origin.outcome	data_source.outcome	samplesize.outcome	se.exposure	pval.exposure	exposure	mr_keep.exposure	pval_origin.exposure	id.exposure	data_source.exposure	samplesize.exposure	action	SNP_index	mr_keep	R2	f	meanf	units.outcome	units.exposure	rsq.exposure	effective_n.exposure	rsq.outcome	effective_n.outcome	steiger_dir	steiger_pval
GCST90032174	rs10781012	G	A	G	A	-0.0172745	-0.000920851	0.13386	0.168747	FALSE	FALSE	FALSE	sbIIIp	0.00961123	0.923672	outcome	TRUE	reported	textfile	458440	0.0037525	4.2e-06	exposure	TRUE	reported	8D3oHL	textfile	5959	2	1	TRUE	0.00354368	21.1848	22.6422	NA	NA	0.00354487	5959	2.00235e-08	458440	TRUE	5.11763e-06
	rs10878425	T	C	T	C	-0.0124292	-0.000117761	0.337956	0.195445	FALSE	FALSE	FALSE	sbIIIp	0.00908386	0.989657	outcome	TRUE	reported	textfile	458440	0.00270984	4.5e-06	exposure	TRUE	reported	8D3oHL	textfile	5959	2	1	TRUE	0.00351799	21.0307	22.6422	NA	NA	0.00351917	5959	3.66591e-10	458440	TRUE	5.29731e-06
	rs118022621	G	A	G	A	-0.0317201	0.0338007	0.0356602	0.0555438	FALSE	FALSE	FALSE	sbIIIp	0.0157163	0.0315021	outcome	TRUE	reported	textfile	458440	0.0068693	3.9e-06	exposure	TRUE	reported	8D3oHL	textfile	5959	2	1	TRUE	0.00356549	21.3156	22.6422	NA	NA	0.00356669	5959	1.00894e-05	458440	TRUE	1.41658e-05
	rs12637754	G	A	G	A	-0.0188591	0.00778648	0.174072	0.12768	FALSE	FALSE	FALSE	sbIIIp	0.0107851	0.470316	outcome	TRUE	reported	textfile	458440	0.0033716	2.2e-08	exposure	TRUE	reported	8D3oHL	textfile	5959	2	1	TRUE	0.00522303	31.2769	22.6422	NA	NA	0.00522477	5959	1.13698e-06	458440	TRUE	4.48895e-08
	rs13020322	G	A	G	A	0.0143566	-0.00788176	0.216163	0.272291	FALSE	FALSE	FALSE	sbIIIp	0.00808615	0.329697	outcome	TRUE	reported	textfile	458440	0.00312659	4.4e-06	exposure	TRUE	reported	8D3oHL	textfile	5959	2	1	TRUE	0.00352577	21.0773	22.6422	NA	NA	0.00352695	5959	2.07244e-06	458440	TRUE	8.63598e-06
	rs164427	A	G	A	G	-0.0151409	0.0373727	0.192714	0.194873	FALSE	FALSE	FALSE	sbIIIp	0.00904312	3.58484e-05	outcome	TRUE	reported	textfile	458440	0.00324862	3.2e-06	exposure	TRUE	reported	8D3oHL	textfile	5959	2	1	TRUE	0.00363205	21.715	22.6422	NA	NA	0.00363327	5959	3.72542e-05	458440	TRUE	3.18929e-05
	rs2827109	G	A	G	A	-0.0136058	0.00335302	0.249063	0.238213	FALSE	FALSE	FALSE	sbIIIp	0.00847072	0.692226	outcome	TRUE	reported	textfile	458440	0.00297597	4.8e-06	exposure	TRUE	reported	8D3oHL	textfile	5959	2	1	TRUE	0.0034954	20.8951	22.6422	NA	NA	0.00349657	5959	3.41783e-07	458440	TRUE	6.96964e-06
GCST90032189	rs139588694	G	A	G	A	0.158035	-0.0257659	0.0157913	0.0106153	FALSE	FALSE	FALSE	1GVcY7	0.0351672	0.463762	outcome	TRUE	reported	textfile	458440	0.0340804	3.5e-06	exposure	TRUE	reported	52Kelv	textfile	5959	2	1	TRUE	0.0035955	21.4957	23.1593	NA	NA	0.0035967	5959	1.17094e-06	458440	TRUE	6.15009e-06
	rs1599011	T	G	T	G	-0.0404217	0.0146562	0.364858	0.380548	FALSE	FALSE	FALSE	1GVcY7	0.0074111	0.0479744	outcome	TRUE	reported	textfile	458440	0.00875908	3.9e-06	exposure	TRUE	reported	52Kelv	textfile	5959	2	1	TRUE	0.00356114	21.2895	23.1593	NA	NA	0.00356233	5959	8.53087e-06	458440	TRUE	1.31213e-05
	rs6697926	C	T	C	T	0.0483724	-0.015931	0.361313	0.337481	FALSE	FALSE	FALSE	1GVcY7	0.00761202	0.0363605	outcome	TRUE	reported	textfile	458440	0.00886599	4.9e-08	exposure	TRUE	reported	52Kelv	textfile	5959	2	1	TRUE	0.00497054	29.7574	23.1593	NA	NA	0.0049722	5959	9.55436e-06	458440	TRUE	2.23227e-07
	rs6834989	C	T	C	T	0.0423093	-0.0150516	0.326897	0.299821	FALSE	FALSE	FALSE	1GVcY7	0.00785961	0.0554843	outcome	TRUE	reported	textfile	458440	0.00916419	3.9e-06	exposure	TRUE	reported	52Kelv	textfile	5959	2	1	TRUE	0.00356418	21.3078	23.1593	NA	NA	0.00356537	5959	7.9998e-06	458440	TRUE	1.259e-05
	rs6866016	A	G	A	G	0.0580378	0.00948658	0.150378	0.128877	FALSE	FALSE	FALSE	1GVcY7	0.0107359	0.376895	outcome	TRUE	reported	textfile	458440	0.0117835	8.4e-07	exposure	TRUE	reported	52Kelv	textfile	5959	2	1	TRUE	0.00405448	24.2509	23.1593	NA	NA	0.00405584	5959	1.70318e-06	458440	TRUE	1.66896e-06
	rs7165513	T	A	T	A	0.0494512	-0.0143074	0.216556	0.215652	FALSE	TRUE	FALSE	1GVcY7	0.00875916	0.102379	outcome	TRUE	reported	textfile	458440	0.0104332	2.1e-06	exposure	TRUE	reported	52Kelv	textfile	5959	2	1	TRUE	0.00375587	22.4581	23.1593	NA	NA	0.00375713	5959	5.81987e-06	458440	TRUE	6.1558e-06
	rs74838822	A	C	A	C	-0.151178	0.0219137	0.0174555	0.0139037	FALSE	FALSE	FALSE	1GVcY7	0.0306846	0.475128	outcome	TRUE	reported	textfile	458440	0.032556	3.4e-06	exposure	TRUE	reported	52Kelv	textfile	5959	2	1	TRUE	0.00360556	21.5561	23.1593	NA	NA	0.00360677	5959	1.11252e-06	458440	TRUE	5.90643e-06
GCST90032254	rs10931443	A	G	A	G	0.0411734	0.00862066	0.4361	0.49591	FALSE	FALSE	FALSE	ohAhVo	0.00720579	0.231559	outcome	TRUE	reported	textfile	458440	0.00659452	4.3e-10	exposure	TRUE	reported	2R1p0K	textfile	5959	2	1	TRUE	0.00649923	38.9692	23.5505	NA	NA	0.0065014	5959	3.12202e-06	458440	TRUE	1.35565e-09
	rs113106320	G	A	G	A	0.117179	0.00582416	0.0170847	0.0199754	FALSE	FALSE	FALSE	ohAhVo	0.0257105	0.82079	outcome	TRUE	reported	textfile	458440	0.0254124	4e-06	exposure	TRUE	reported	2R1p0K	textfile	5959	2	1	TRUE	0.0035554	21.2551	23.5505	NA	NA	0.00355659	5959	1.11935e-07	458440	TRUE	5.29691e-06
	rs12074319	C	T	C	T	0.126398	-0.0192901	0.0149317	0.0204149	FALSE	FALSE	FALSE	ohAhVo	0.0254483	0.448445	outcome	TRUE	reported	textfile	458440	0.027256	3.5e-06	exposure	TRUE	reported	2R1p0K	textfile	5959	2	1	TRUE	0.00359599	21.4986	23.5505	NA	NA	0.00359719	5959	1.25334e-06	458440	TRUE	6.22484e-06
	rs13025431	A	G	A	G	0.0408933	0.0257499	0.168014	0.134362	FALSE	FALSE	FALSE	ohAhVo	0.0105488	0.0146457	outcome	TRUE	reported	textfile	458440	0.00884377	3.8e-06	exposure	TRUE	reported	2R1p0K	textfile	5959	2	1	TRUE	0.0035752	21.3739	23.5505	NA	NA	0.0035764	5959	1.29975e-05	458440	TRUE	1.59858e-05
	rs156926	T	G	T	G	0.0504456	0.0143739	0.102151	0.158173	FALSE	FALSE	FALSE	ohAhVo	0.00986443	0.145077	outcome	TRUE	reported	textfile	458440	0.0108539	3.4e-06	exposure	TRUE	reported	2R1p0K	textfile	5959	2	1	TRUE	0.00361185	21.5938	23.5505	NA	NA	0.00361306	5959	4.63151e-06	458440	TRUE	8.60305e-06
	rs2073142	C	T	C	T	-0.0321878	0.00185675	0.362568	0.318555	FALSE	FALSE	FALSE	ohAhVo	0.00772728	0.810109	outcome	TRUE	reported	textfile	458440	0.00700624	4.3e-06	exposure	TRUE	reported	2R1p0K	textfile	5959	2	1	TRUE	0.00352942	21.0992	23.5505	NA	NA	0.0035306	5959	1.25943e-07	458440	TRUE	5.77894e-06
	rs62553714	C	T	C	T	-0.0467362	-0.0213015	0.120988	0.180884	FALSE	FALSE	FALSE	ohAhVo	0.00936124	0.022876	outcome	TRUE	reported	textfile	458440	0.0101009	3.7e-06	exposure	TRUE	reported	2R1p0K	textfile	5959	2	1	TRUE	0.00357978	21.4013	23.5505	NA	NA	0.00358097	5959	1.12945e-05	458440	TRUE	1.44878e-05
	rs73203290	T	A	C	A	-0.0329054	-0.304196	0.325444	0.00026612	TRUE	TRUE	FALSE	ohAhVo	0.222961	0.172459	outcome	TRUE	reported	textfile	458440	0.00714317	4.1e-06	exposure	TRUE	reported	2R1p0K	textfile	5959	2	1	FALSE	0.00354842	21.2132	23.5505	NA	NA	0.00354961	5959	4.06038e-06	458440	TRUE	9.90161e-06
GCST90032282	rs11149701	A	G	A	G	0.135369	-0.00795783	0.108286	0.129907	FALSE	FALSE	FALSE	4JoPVN	0.0108751	0.464323	outcome	TRUE	reported	textfile	458440	0.0293644	4e-06	exposure	TRUE	reported	J8P9EQ	textfile	5959	2	1	TRUE	0.00355367	21.2447	22.8041	NA	NA	0.00355486	5959	1.168e-06	458440	TRUE	6.97863e-06
	rs113732002	C	A	C	A	0.202097	-0.0208434	0.0682663	0.0928758	FALSE	FALSE	FALSE	4JoPVN	0.0124151	0.0931751	outcome	TRUE	reported	textfile	458440	0.0356882	1.5e-08	exposure	TRUE	reported	J8P9EQ	textfile	5959	2	1	TRUE	0.00535262	32.0571	22.8041	NA	NA	0.0053544	5959	6.14828e-06	458440	TRUE	5.61074e-08
	rs117186187	A	G	A	G	0.295153	0.00746362	0.0204082	0.0198848	FALSE	FALSE	FALSE	4JoPVN	0.0258111	0.772456	outcome	TRUE	reported	textfile	458440	0.0636661	3.6e-06	exposure	TRUE	reported	J8P9EQ	textfile	5959	2	1	TRUE	0.00359369	21.4848	22.8041	NA	NA	0.0035949	5959	1.82392e-07	458440	TRUE	4.87193e-06
	rs12937830	C	T	C	T	0.15813	-0.0133206	0.075475	0.105938	FALSE	FALSE	FALSE	4JoPVN	0.0116973	0.254797	outcome	TRUE	reported	textfile	458440	0.0343259	4.1e-06	exposure	TRUE	reported	J8P9EQ	textfile	5959	2	1	TRUE	0.00354868	21.2148	22.8041	NA	NA	0.00354987	5959	2.82875e-06	458440	TRUE	8.7881e-06
	rs138926794	G	C	G	C	0.38644	-0.159967	0.0120168	0.00428846	FALSE	TRUE	FALSE	4JoPVN	0.0572445	0.00519888	outcome	TRUE	reported	textfile	458440	0.0827154	3e-06	exposure	TRUE	reported	J8P9EQ	textfile	5959	2	1	TRUE	0.00364947	21.8195	22.8041	NA	NA	0.00365069	5959	1.70336e-05	458440	TRUE	1.54495e-05
	rs1491836	G	A	G	A	-0.0933152	0.00669096	0.304979	0.280627	FALSE	FALSE	FALSE	4JoPVN	0.0080142	0.40378	outcome	TRUE	reported	textfile	458440	0.0192791	1.3e-06	exposure	TRUE	reported	J8P9EQ	textfile	5959	2	1	TRUE	0.0039161	23.4199	22.8041	NA	NA	0.00391741	5959	1.52046e-06	458440	TRUE	2.4652e-06
	rs1579597	A	G	A	G	-0.103418	0.00357187	0.221867	0.254466	FALSE	FALSE	FALSE	4JoPVN	0.00826056	0.665451	outcome	TRUE	reported	textfile	458440	0.0215032	1.5e-06	exposure	TRUE	reported	J8P9EQ	textfile	5959	2	1	TRUE	0.00386661	23.1228	22.8041	NA	NA	0.0038679	5959	4.07842e-07	458440	TRUE	2.28956e-06
	rs1715444	G	T	G	T	-0.0837411	0.00375903	0.442879	0.426739	FALSE	FALSE	FALSE	4JoPVN	0.00727709	0.605466	outcome	TRUE	reported	textfile	458440	0.0180142	3.3e-06	exposure	TRUE	reported	J8P9EQ	textfile	5959	2	1	TRUE	0.00361328	21.6024	22.8041	NA	NA	0.00361449	5959	5.82043e-07	458440	TRUE	5.18808e-06
	rs17797837	T	C	T	C	0.120186	-0.0110378	0.138491	0.158339	FALSE	FALSE	FALSE	4JoPVN	0.00985614	0.262761	outcome	TRUE	reported	textfile	458440	0.0262205	4.6e-06	exposure	TRUE	reported	J8P9EQ	textfile	5959	2	1	TRUE	0.00351337	21.0029	22.8041	NA	NA	0.00351455	5959	2.73571e-06	458440	TRUE	9.67574e-06
	rs34575286	T	A	T	A	0.0930241	-0.00856135	0.317247	0.273363	FALSE	TRUE	FALSE	4JoPVN	0.00807495	0.289038	outcome	TRUE	reported	textfile	458440	0.0193287	1.5e-06	exposure	TRUE	reported	J8P9EQ	textfile	5959	2	1	TRUE	0.00387193	23.1547	22.8041	NA	NA	0.00387322	5959	2.45202e-06	458440	TRUE	3.18959e-06
	rs6538367	A	C	A	C	0.174774	0.00107144	0.0636013	0.054439	FALSE	FALSE	FALSE	4JoPVN	0.0158956	0.946259	outcome	TRUE	reported	textfile	458440	0.0366911	1.9e-06	exposure	TRUE	reported	J8P9EQ	textfile	5959	2	1	TRUE	0.00379322	22.6823	22.8041	NA	NA	0.00379449	5959	9.91063e-09	458440	TRUE	2.33864e-06
	rs6566292	G	A	G	A	-0.0878332	-0.0142705	0.368847	0.299828	FALSE	FALSE	FALSE	4JoPVN	0.00786198	0.069504	outcome	TRUE	reported	textfile	458440	0.0186653	2.5e-06	exposure	TRUE	reported	J8P9EQ	textfile	5959	2	1	TRUE	0.00370223	22.1361	22.8041	NA	NA	0.00370347	5959	7.18672e-06	458440	TRUE	7.94814e-06
	rs72862367	T	A	T	A	0.15513	0.00653371	0.089748	0.0540027	FALSE	TRUE	FALSE	4JoPVN	0.0158997	0.681122	outcome	TRUE	reported	textfile	458440	0.0314898	8.4e-07	exposure	TRUE	reported	J8P9EQ	textfile	5959	2	1	TRUE	0.00405614	24.2608	22.8041	NA	NA	0.0040575	5959	3.6835e-07	458440	TRUE	1.26996e-06
	rs77600851	A	T	A	T	-0.17728	0.0328874	0.0581809	0.0187407	FALSE	TRUE	FALSE	4JoPVN	0.026631	0.216855	outcome	TRUE	reported	textfile	458440	0.0384909	4.1e-06	exposure	TRUE	reported	J8P9EQ	textfile	5959	2	1	TRUE	0.00354721	21.2059	22.8041	NA	NA	0.0035484	5959	3.32661e-06	458440	TRUE	9.28517e-06
	rs8037071	C	A	C	A	-0.0972068	0.00485867	0.251148	0.272755	FALSE	FALSE	FALSE	4JoPVN	0.008085	0.547874	outcome	TRUE	reported	textfile	458440	0.0208866	3.3e-06	exposure	TRUE	reported	J8P9EQ	textfile	5959	2	1	TRUE	0.00362167	21.6527	22.8041	NA	NA	0.00362288	5959	7.8776e-07	458440	TRUE	5.29256e-06
GCST90032287	rs10871677	T	G	T	G	0.0945277	0.00851394	0.0458607	0.063438	FALSE	FALSE	FALSE	zBb6YN	0.0147727	0.564393	outcome	TRUE	reported	textfile	458440	0.0203074	3.2e-06	exposure	TRUE	reported	0REVMb	textfile	5959	2	1	TRUE	0.00362293	21.6603	22.601	NA	NA	0.00362414	5959	7.24537e-07	458440	TRUE	5.20284e-06
	rs11021720	C	G	C	G	-0.0592819	-0.0177872	0.133935	0.125071	FALSE	TRUE	FALSE	zBb6YN	0.0108778	0.10201	outcome	TRUE	reported	textfile	458440	0.012621	2.6e-06	exposure	TRUE	reported	0REVMb	textfile	5959	2	1	TRUE	0.00368874	22.0552	22.601	NA	NA	0.00368998	5959	5.83243e-06	458440	TRUE	7.51989e-06
	rs115282868	G	A	G	A	0.0563131	0.0179605	0.150696	0.0695674	FALSE	FALSE	FALSE	zBb6YN	0.0141059	0.202927	outcome	TRUE	reported	textfile	458440	0.0121721	3.7e-06	exposure	TRUE	reported	0REVMb	textfile	5959	2	1	TRUE	0.00357896	21.3965	22.601	NA	NA	0.00358016	5959	3.53633e-06	458440	TRUE	8.61445e-06
	rs141167708	A	T	A	T	0.174208	0.00163478	0.0151922	0.0166107	FALSE	TRUE	FALSE	zBb6YN	0.0282438	0.953843	outcome	TRUE	reported	textfile	458440	0.0349983	6.4e-07	exposure	TRUE	reported	0REVMb	textfile	5959	2	1	TRUE	0.00414063	24.7683	22.601	NA	NA	0.00414202	5959	7.30789e-09	458440	TRUE	8.00692e-07
	rs1868719	G	A	G	A	0.141991	0.0128604	0.0208227	0.043146	FALSE	FALSE	FALSE	zBb6YN	0.0177576	0.46893	outcome	TRUE	reported	textfile	458440	0.0298352	1.9e-06	exposure	TRUE	reported	0REVMb	textfile	5959	2	1	TRUE	0.00378654	22.6422	22.601	NA	NA	0.00378781	5959	1.14409e-06	458440	TRUE	3.4313e-06
	rs55998350	C	A	C	A	0.0918758	0.0196123	0.0508645	0.0800966	FALSE	FALSE	FALSE	zBb6YN	0.0132846	0.139858	outcome	TRUE	reported	textfile	458440	0.0195588	2.6e-06	exposure	TRUE	reported	0REVMb	textfile	5959	2	1	TRUE	0.00368926	22.0583	22.601	NA	NA	0.00369049	5959	4.7542e-06	458440	TRUE	6.90048e-06
	rs62129301	T	C	T	C	0.116007	0.042083	0.0329689	0.0512292	FALSE	FALSE	FALSE	zBb6YN	0.0161844	0.00931623	outcome	TRUE	reported	textfile	458440	0.023824	1.1e-06	exposure	TRUE	reported	0REVMb	textfile	5959	2	1	TRUE	0.00396315	23.7025	22.601	NA	NA	0.00396448	5959	1.4748e-05	458440	TRUE	5.62739e-06
	rs72681268	T	C	T	C	0.181171	0.00198651	0.0121228	0.0334657	FALSE	FALSE	FALSE	zBb6YN	0.0200364	0.921023	outcome	TRUE	reported	textfile	458440	0.0390936	3.6e-06	exposure	TRUE	reported	0REVMb	textfile	5959	2	1	TRUE	0.00359112	21.4694	22.601	NA	NA	0.00359232	5959	2.14418e-08	458440	TRUE	4.43039e-06
	rs844732	C	T	C	T	-0.0631159	-0.008924	0.129199	0.136277	FALSE	FALSE	FALSE	zBb6YN	0.0104774	0.394362	outcome	TRUE	reported	textfile	458440	0.0129745	1.1e-06	exposure	TRUE	reported	0REVMb	textfile	5959	2	1	TRUE	0.0039555	23.6565	22.601	NA	NA	0.00395683	5959	1.58245e-06	458440	TRUE	2.20945e-06
GCST90032298	rs10031823	T	C	T	C	0.0847214	0.0256806	0.326536	0.391847	FALSE	FALSE	FALSE	dRa908	0.00736839	0.000491688	outcome	TRUE	reported	textfile	458440	0.0179689	2.4e-06	exposure	TRUE	reported	jGCvz7	textfile	5959	2	1	TRUE	0.00371666	22.2227	30.5342	NA	NA	0.0037179	5959	2.64956e-05	458440	TRUE	1.81462e-05
	rs11027423	C	T	C	T	-0.0819372	-0.000758711	0.453339	0.37831	FALSE	FALSE	FALSE	dRa908	0.00741999	0.918557	outcome	TRUE	reported	textfile	458440	0.0175433	3e-06	exposure	TRUE	reported	jGCvz7	textfile	5959	2	1	TRUE	0.00364737	21.8069	30.5342	NA	NA	0.00364859	5959	2.28069e-08	458440	TRUE	3.7329e-06
	rs1265491	G	A	G	A	0.142992	0.00439133	0.117592	0.145984	FALSE	FALSE	FALSE	dRa908	0.0101918	0.666563	outcome	TRUE	reported	textfile	458440	0.0263066	5.5e-08	exposure	TRUE	reported	jGCvz7	textfile	5959	2	1	TRUE	0.0049337	29.5358	30.5342	NA	NA	0.00493535	5959	4.04958e-07	458440	TRUE	8.94625e-08
	rs34892180	C	G	C	G	0.123142	0.0282896	0.119976	0.137408	FALSE	TRUE	FALSE	dRa908	0.0104069	0.0065607	outcome	TRUE	reported	textfile	458440	0.0262629	2.7e-06	exposure	TRUE	reported	jGCvz7	textfile	5959	2	1	TRUE	0.00367582	21.9777	30.5342	NA	NA	0.00367705	5959	1.61184e-05	458440	TRUE	1.37664e-05
	rs35026345	T	C	T	C	-0.100796	0.0055009	0.318743	0.223601	FALSE	FALSE	FALSE	dRa908	0.00865512	0.52506	outcome	TRUE	reported	textfile	458440	0.018036	2.3e-08	exposure	TRUE	reported	jGCvz7	textfile	5959	2	1	TRUE	0.0052139	31.222	30.5342	NA	NA	0.00521564	5959	8.81131e-07	458440	TRUE	4.36614e-08
	rs3940549	G	A	G	A	-0.151222	-0.00508762	0.421891	0.27302	FALSE	FALSE	FALSE	dRa908	0.00829206	0.539511	outcome	TRUE	reported	textfile	458440	0.0172948	2.3e-18	exposure	TRUE	reported	jGCvz7	textfile	5959	2	1	TRUE	0.0126674	76.4281	30.5342	NA	NA	0.0126716	5959	8.21152e-07	458440	TRUE	8.05231e-18
	rs4877754	G	A	G	A	0.0877175	0.0156708	0.376153	0.50002	FALSE	FALSE	FALSE	dRa908	0.00720462	0.0296224	outcome	TRUE	reported	textfile	458440	0.0175692	6e-07	exposure	TRUE	reported	jGCvz7	textfile	5959	2	1	TRUE	0.00416564	24.9185	30.5342	NA	NA	0.00416704	5959	1.03199e-05	458440	TRUE	2.47268e-06
	rs59677531	C	G	C	G	-0.0815941	-0.00612649	0.496551	0.477996	FALSE	TRUE	TRUE	dRa908	0.00721192	0.395606	outcome	TRUE	reported	textfile	458440	0.0169172	1.4e-06	exposure	TRUE	reported	jGCvz7	textfile	5959	2	1	FALSE	0.00388862	23.2549	30.5342	NA	NA	0.00388992	5959	1.57413e-06	458440	TRUE	2.70024e-06
	rs59998390	A	G	A	G	0.175963	-0.00122335	0.0582418	0.0217913	FALSE	FALSE	FALSE	dRa908	0.0245896	0.960321	outcome	TRUE	reported	textfile	458440	0.0363376	1.3e-06	exposure	TRUE	reported	jGCvz7	textfile	5959	2	1	TRUE	0.00391969	23.4414	30.5342	NA	NA	0.003921	5959	5.39906e-09	458440	TRUE	1.57004e-06
GCST90032330	rs116926743	C	G	C	G	-0.383896	-0.03159	0.0113312	0.0123877	FALSE	TRUE	FALSE	tVR6NI	0.0324386	0.330136	outcome	TRUE	reported	textfile	458440	0.0774636	7.2e-07	exposure	TRUE	reported	LKxIfy	textfile	5959	2	1	TRUE	0.00410461	24.552	24.7598	NA	NA	0.00410598	5959	2.06868e-06	458440	TRUE	1.51032e-06
	rs12375090	T	C	T	C	-0.10466	0.00194983	0.169329	0.189475	FALSE	FALSE	FALSE	tVR6NI	0.00917988	0.831793	outcome	TRUE	reported	textfile	458440	0.0216657	1.4e-06	exposure	TRUE	reported	LKxIfy	textfile	5959	2	1	TRUE	0.00390072	23.3276	24.7598	NA	NA	0.00390203	5959	9.84099e-08	458440	TRUE	1.82392e-06
	rs17022786	G	A	G	A	0.110343	0.0104026	0.210585	0.209993	FALSE	FALSE	FALSE	tVR6NI	0.00883479	0.239014	outcome	TRUE	reported	textfile	458440	0.0204562	6.9e-08	exposure	TRUE	reported	LKxIfy	textfile	5959	2	1	TRUE	0.00485904	29.0867	24.7598	NA	NA	0.00486067	5959	3.02419e-06	458440	TRUE	1.7771e-07
	rs17466062	A	G	A	G	-0.280928	0.0242643	0.0191142	0.0174058	FALSE	FALSE	FALSE	tVR6NI	0.0274401	0.376554	outcome	TRUE	reported	textfile	458440	0.0600627	2.9e-06	exposure	TRUE	reported	LKxIfy	textfile	5959	2	1	TRUE	0.00365776	21.8693	24.7598	NA	NA	0.00365899	5959	1.70562e-06	458440	TRUE	5.52534e-06
	rs550057	T	C	T	C	0.0994397	0.0231316	0.307628	0.254067	FALSE	FALSE	FALSE	tVR6NI	0.0082626	0.00511729	outcome	TRUE	reported	textfile	458440	0.0178167	2.4e-08	exposure	TRUE	reported	LKxIfy	textfile	5959	2	1	TRUE	0.00520029	31.14	24.7598	NA	NA	0.00520202	5959	1.70958e-05	458440	TRUE	1.76024e-07
	rs646850	C	T	C	T	-0.0814458	-0.01183	0.345739	0.303618	FALSE	FALSE	FALSE	tVR6NI	0.0078324	0.130943	outcome	TRUE	reported	textfile	458440	0.0173649	2.7e-06	exposure	TRUE	reported	LKxIfy	textfile	5959	2	1	TRUE	0.00367806	21.9911	24.7598	NA	NA	0.00367929	5959	4.97619e-06	458440	TRUE	7.26491e-06
	rs9812270	A	G	A	G	0.180714	0.0225875	0.0475991	0.0434463	FALSE	FALSE	FALSE	tVR6NI	0.0176753	0.20128	outcome	TRUE	reported	textfile	458440	0.0391023	3.8e-06	exposure	TRUE	reported	LKxIfy	textfile	5959	2	1	TRUE	0.00357151	21.3517	24.7598	NA	NA	0.0035727	5959	3.56222e-06	458440	TRUE	8.83056e-06
GCST90032331	rs10248016	C	T	C	T	0.0242762	-0.00196147	0.261852	0.228696	FALSE	FALSE	FALSE	f91ufL	0.00858362	0.819247	outcome	TRUE	reported	textfile	458440	0.00528553	4.4e-06	exposure	TRUE	reported	O5awhM	textfile	5959	2	1	TRUE	0.00352757	21.0882	21.9158	NA	NA	0.00352875	5959	1.13905e-07	458440	TRUE	5.77522e-06
	rs11885958	G	A	G	A	-0.0843344	0.0278793	0.0173716	0.0244918	FALSE	FALSE	FALSE	f91ufL	0.023513	0.235742	outcome	TRUE	reported	textfile	458440	0.0177809	2.1e-06	exposure	TRUE	reported	O5awhM	textfile	5959	2	1	TRUE	0.0037609	22.4883	21.9158	NA	NA	0.00376216	5959	3.06666e-06	458440	TRUE	4.7661e-06
	rs12120892	T	C	T	C	0.0566032	-0.0276098	0.0411111	0.037981	FALSE	FALSE	FALSE	f91ufL	0.0188124	0.142202	outcome	TRUE	reported	textfile	458440	0.0117247	1.4e-06	exposure	TRUE	reported	O5awhM	textfile	5959	2	1	TRUE	0.00389592	23.2988	21.9158	NA	NA	0.00389722	5959	4.69846e-06	458440	TRUE	3.71184e-06
	rs140722677	G	C	G	C	0.0672412	-0.0419301	0.026713	0.00851366	FALSE	TRUE	FALSE	f91ufL	0.0392587	0.285501	outcome	TRUE	reported	textfile	458440	0.0143486	2.8e-06	exposure	TRUE	reported	O5awhM	textfile	5959	2	1	TRUE	0.00367182	21.9536	21.9158	NA	NA	0.00367304	5959	2.48827e-06	458440	TRUE	5.84541e-06
	rs142777179	A	G	A	G	-0.0779291	0.0325277	0.0191558	0.0389309	FALSE	FALSE	FALSE	f91ufL	0.0185679	0.0798031	outcome	TRUE	reported	textfile	458440	0.0169602	4.3e-06	exposure	TRUE	reported	O5awhM	textfile	5959	2	1	TRUE	0.00353043	21.1053	21.9158	NA	NA	0.00353161	5959	6.69418e-06	458440	TRUE	1.27826e-05
	rs143606156	T	C	T	C	-0.108372	0.0280141	0.0106794	0.0192632	FALSE	FALSE	FALSE	f91ufL	0.0262285	0.285485	outcome	TRUE	reported	textfile	458440	0.0222366	1.1e-06	exposure	TRUE	reported	O5awhM	textfile	5959	2	1	TRUE	0.00397005	23.7439	21.9158	NA	NA	0.00397138	5959	2.48843e-06	458440	TRUE	2.38577e-06
	rs17203668	T	G	T	G	0.0816463	-0.0158811	0.0178057	0.0309081	FALSE	FALSE	FALSE	f91ufL	0.0207518	0.4441	outcome	TRUE	reported	textfile	458440	0.0176193	3.6e-06	exposure	TRUE	reported	O5awhM	textfile	5959	2	1	TRUE	0.00359054	21.4659	21.9158	NA	NA	0.00359174	5959	1.27752e-06	458440	TRUE	6.35306e-06
	rs1873537	T	A	T	A	0.0492671	0.022672	0.050663	0.06108	FALSE	TRUE	FALSE	f91ufL	0.015063	0.132287	outcome	TRUE	reported	textfile	458440	0.010531	2.9e-06	exposure	TRUE	reported	O5awhM	textfile	5959	2	1	TRUE	0.00365939	21.8791	21.9158	NA	NA	0.00366062	5959	4.94167e-06	458440	TRUE	7.65874e-06
	rs56944804	C	T	C	T	0.097071	-0.0250297	0.012273	0.0177242	FALSE	FALSE	FALSE	f91ufL	0.0272662	0.358632	outcome	TRUE	reported	textfile	458440	0.0211222	4.3e-06	exposure	TRUE	reported	O5awhM	textfile	5959	2	1	TRUE	0.00353176	21.1132	21.9158	NA	NA	0.00353294	5959	1.83815e-06	458440	TRUE	8.23108e-06
	rs61936974	A	G	A	G	0.0275386	-0.00440663	0.204235	0.158609	FALSE	FALSE	FALSE	f91ufL	0.00985258	0.65469	outcome	TRUE	reported	textfile	458440	0.00588241	2.8e-06	exposure	TRUE	reported	O5awhM	textfile	5959	2	1	TRUE	0.00366442	21.9092	21.9158	NA	NA	0.00366565	5959	4.36347e-07	458440	TRUE	4.27571e-06
	rs75453249	T	C	T	C	0.0676892	0.000488724	0.0277684	0.047377	FALSE	FALSE	FALSE	f91ufL	0.0169863	0.977047	outcome	TRUE	reported	textfile	458440	0.0142255	2e-06	exposure	TRUE	reported	O5awhM	textfile	5959	2	1	TRUE	0.00378515	22.6338	21.9158	NA	NA	0.00378642	5959	1.80571e-09	458440	TRUE	2.34638e-06
	rs78189310	G	A	G	A	-0.0886617	-0.0202282	0.0147849	0.0184866	FALSE	FALSE	FALSE	f91ufL	0.0267283	0.449164	outcome	TRUE	reported	textfile	458440	0.0191852	3.8e-06	exposure	TRUE	reported	O5awhM	textfile	5959	2	1	TRUE	0.00357118	21.3498	21.9158	NA	NA	0.00357238	5959	1.24937e-06	458440	TRUE	6.70652e-06
	rs8007124	A	G	A	G	-0.0211928	0.00920156	0.444444	0.531738	FALSE	FALSE	FALSE	f91ufL	0.00721865	0.202418	outcome	TRUE	reported	textfile	458440	0.00463757	4.9e-06	exposure	TRUE	reported	O5awhM	textfile	5959	2	1	TRUE	0.00349223	20.8761	21.9158	NA	NA	0.0034934	5959	3.54429e-06	458440	TRUE	1.11786e-05
GCST90032359	rs1011166	A	G	A	G	0.151181	-0.0173157	0.046973	0.0226911	FALSE	FALSE	FALSE	3r2gA6	0.0241515	0.473399	outcome	TRUE	reported	textfile	458440	0.0309222	1e-06	exposure	TRUE	reported	zVFmBZ	textfile	5959	2	1	TRUE	0.00399523	23.895	23.8084	NA	NA	0.00399657	5959	1.12127e-06	458440	TRUE	1.81702e-06
	rs11927941	G	A	G	A	0.0663341	0.00365687	0.313245	0.312854	FALSE	FALSE	FALSE	3r2gA6	0.00775761	0.637362	outcome	TRUE	reported	textfile	458440	0.0142231	3.1e-06	exposure	TRUE	reported	zVFmBZ	textfile	5959	2	1	TRUE	0.00363688	21.744	23.8084	NA	NA	0.0036381	5959	4.8471e-07	458440	TRUE	4.7116e-06
	rs12606213	C	T	C	T	0.112796	0.0154996	0.077957	0.0406476	FALSE	FALSE	FALSE	3r2gA6	0.0182884	0.396712	outcome	TRUE	reported	textfile	458440	0.0242296	3.2e-06	exposure	TRUE	reported	zVFmBZ	textfile	5959	2	1	TRUE	0.00362364	21.6645	23.8084	NA	NA	0.00362485	5959	1.56678e-06	458440	TRUE	6.00592e-06
	rs1321323	C	T	C	T	0.155095	0.0347494	0.0377628	0.0377585	FALSE	FALSE	FALSE	3r2gA6	0.0188409	0.0651313	outcome	TRUE	reported	textfile	458440	0.0337811	4.4e-06	exposure	TRUE	reported	zVFmBZ	textfile	5959	2	1	TRUE	0.00352485	21.0718	23.8084	NA	NA	0.00352603	5959	7.42006e-06	458440	TRUE	1.36324e-05
	rs17535596	G	A	G	A	0.153025	0.00172269	0.0477476	0.0369023	FALSE	FALSE	FALSE	3r2gA6	0.0190634	0.927996	outcome	TRUE	reported	textfile	458440	0.0306311	5.9e-07	exposure	TRUE	reported	zVFmBZ	textfile	5959	2	1	TRUE	0.00417072	24.949	23.8084	NA	NA	0.00417212	5959	1.78128e-08	458440	TRUE	7.4408e-07
	rs34022830	G	A	G	A	0.284	0.0251495	0.014869	0.0287911	FALSE	FALSE	FALSE	3r2gA6	0.021526	0.242672	outcome	TRUE	reported	textfile	458440	0.0537986	1.3e-07	exposure	TRUE	reported	zVFmBZ	textfile	5959	2	1	TRUE	0.00465474	27.8579	23.8084	NA	NA	0.00465629	5959	2.97749e-06	458440	TRUE	3.25322e-07
	rs4556017	C	T	C	T	-0.0963984	-0.0234367	0.178173	0.146644	FALSE	FALSE	FALSE	3r2gA6	0.0101569	0.0210286	outcome	TRUE	reported	textfile	458440	0.0170714	1.6e-08	exposure	TRUE	reported	zVFmBZ	textfile	5959	2	1	TRUE	0.00532243	31.8754	23.8084	NA	NA	0.00532421	5959	1.16141e-05	458440	TRUE	9.1084e-08
	rs58494940	C	T	C	T	0.0710418	0.0222046	0.237312	0.207342	FALSE	FALSE	FALSE	3r2gA6	0.00888983	0.0124983	outcome	TRUE	reported	textfile	458440	0.0154744	4.4e-06	exposure	TRUE	reported	zVFmBZ	textfile	5959	2	1	TRUE	0.00352447	21.0695	23.8084	NA	NA	0.00352565	5959	1.36086e-05	458440	TRUE	1.90748e-05
	rs67106669	C	A	C	A	0.108849	-0.00114828	0.118475	0.136843	FALSE	FALSE	FALSE	3r2gA6	0.0104718	0.912684	outcome	TRUE	reported	textfile	458440	0.020878	1.9e-07	exposure	TRUE	reported	zVFmBZ	textfile	5959	2	1	TRUE	0.00454068	27.1722	23.8084	NA	NA	0.0045422	5959	2.62284e-08	458440	TRUE	2.427e-07
	rs76580439	C	G	C	G	0.1601	-0.0478577	0.0366655	0.0181463	FALSE	TRUE	FALSE	3r2gA6	0.0270466	0.0768192	outcome	TRUE	reported	textfile	458440	0.0347999	4.2e-06	exposure	TRUE	reported	zVFmBZ	textfile	5959	2	1	TRUE	0.00353927	21.1583	23.8084	NA	NA	0.00354045	5959	6.82959e-06	458440	TRUE	1.25667e-05
	rs77889679	A	G	A	G	0.234029	0.0335241	0.0166526	0.0213943	FALSE	FALSE	FALSE	3r2gA6	0.0248213	0.176817	outcome	TRUE	reported	textfile	458440	0.0511239	4.7e-06	exposure	TRUE	reported	zVFmBZ	textfile	5959	2	1	TRUE	0.00350424	20.9481	23.8084	NA	NA	0.00350541	5959	3.97908e-06	458440	TRUE	1.12192e-05
	rs9403911	T	A	T	A	0.0742133	-0.00123251	0.221885	0.226311	FALSE	TRUE	FALSE	3r2gA6	0.00860776	0.886143	outcome	TRUE	reported	textfile	458440	0.0157146	2.3e-06	exposure	TRUE	reported	zVFmBZ	textfile	5959	2	1	TRUE	0.00372873	22.2952	23.8084	NA	NA	0.00372998	5959	4.47219e-08	458440	TRUE	2.9733e-06
GCST90032371	rs10033614	G	A	G	A	-0.0365982	-0.00830418	0.242126	0.338552	FALSE	FALSE	FALSE	e7iuFL	0.00760559	0.274898	outcome	TRUE	reported	textfile	458440	0.00799857	4.7e-06	exposure	TRUE	reported	roSARv	textfile	5959	2	1	TRUE	0.00350105	20.929	22.6541	NA	NA	0.00350222	5959	2.60043e-06	458440	TRUE	9.89454e-06
	rs10828852	A	T	A	T	-0.0430036	0.00137937	0.17609	0.219409	FALSE	TRUE	FALSE	e7iuFL	0.00870039	0.87403	outcome	TRUE	reported	textfile	458440	0.00902267	1.9e-06	exposure	TRUE	reported	roSARv	textfile	5959	2	1	TRUE	0.00379764	22.7088	22.6541	NA	NA	0.00379891	5959	5.48281e-08	458440	TRUE	2.42718e-06
	rs117026605	G	C	G	C	0.154493	-0.0158952	0.0116318	0.0301882	FALSE	TRUE	FALSE	e7iuFL	0.0209399	0.4478	outcome	TRUE	reported	textfile	458440	0.0321648	1.6e-06	exposure	TRUE	reported	roSARv	textfile	5959	2	1	TRUE	0.0038566	23.0627	22.6541	NA	NA	0.00385789	5959	1.2569e-06	458440	TRUE	2.82943e-06
	rs12823603	A	G	A	G	0.0342846	-0.000851773	0.296912	0.306855	FALSE	FALSE	FALSE	e7iuFL	0.00780787	0.91313	outcome	TRUE	reported	textfile	458440	0.00746813	4.4e-06	exposure	TRUE	reported	roSARv	textfile	5959	2	1	TRUE	0.00352426	21.0683	22.6541	NA	NA	0.00352544	5959	2.59598e-08	458440	TRUE	5.47189e-06
	rs144924770	T	A	T	A	0.102832	0.021363	0.025754	0.0171615	FALSE	TRUE	FALSE	e7iuFL	0.0275884	0.438725	outcome	TRUE	reported	textfile	458440	0.021762	2.3e-06	exposure	TRUE	reported	roSARv	textfile	5959	2	1	TRUE	0.00373303	22.321	22.6541	NA	NA	0.00373428	5959	1.30795e-06	458440	TRUE	4.1468e-06
	rs2974396	A	G	A	G	0.0382647	0.0117148	0.294325	0.27394	FALSE	FALSE	FALSE	e7iuFL	0.00807216	0.146707	outcome	TRUE	reported	textfile	458440	0.00746367	2.9e-07	exposure	TRUE	reported	roSARv	textfile	5959	2	1	TRUE	0.00439144	26.2752	22.6541	NA	NA	0.00439291	5959	4.59418e-06	458440	TRUE	8.42343e-07
	rs55792479	G	A	G	A	-0.0628391	-0.0149525	0.0781224	0.0901045	FALSE	FALSE	FALSE	e7iuFL	0.0125221	0.232446	outcome	TRUE	reported	textfile	458440	0.0126703	7.1e-07	exposure	TRUE	reported	roSARv	textfile	5959	2	1	TRUE	0.00411078	24.589	22.6541	NA	NA	0.00411215	5959	3.11022e-06	458440	TRUE	1.67928e-06
	rs72809280	A	G	A	G	0.045589	0.0031801	0.150605	0.0692501	FALSE	FALSE	FALSE	e7iuFL	0.014205	0.822857	outcome	TRUE	reported	textfile	458440	0.00954076	1.8e-06	exposure	TRUE	reported	roSARv	textfile	5959	2	1	TRUE	0.00381698	22.8249	22.6541	NA	NA	0.00381826	5959	1.09325e-07	458440	TRUE	2.37216e-06
	rs757198	T	C	T	C	0.0345757	0.00729848	0.365666	0.248284	FALSE	FALSE	FALSE	e7iuFL	0.00834881	0.382013	outcome	TRUE	reported	textfile	458440	0.00728322	2.1e-06	exposure	TRUE	reported	roSARv	textfile	5959	2	1	TRUE	0.00376775	22.5294	22.6541	NA	NA	0.00376901	5959	1.667e-06	458440	TRUE	3.94228e-06
	rs78172273	C	T	C	T	0.0497435	0.00361249	0.112903	0.0898242	FALSE	FALSE	FALSE	e7iuFL	0.0126002	0.774342	outcome	TRUE	reported	textfile	458440	0.0108389	4.4e-06	exposure	TRUE	reported	roSARv	textfile	5959	2	1	TRUE	0.00352206	21.0551	22.6541	NA	NA	0.00352324	5959	1.79299e-07	458440	TRUE	6.05984e-06
	rs9545779	T	C	T	C	-0.0797867	-0.0274032	0.0418209	0.0866078	FALSE	FALSE	FALSE	e7iuFL	0.0127705	0.0318867	outcome	TRUE	reported	textfile	458440	0.0170729	3e-06	exposure	TRUE	reported	roSARv	textfile	5959	2	1	TRUE	0.00365161	21.8324	22.6541	NA	NA	0.00365283	5959	1.00439e-05	458440	TRUE	1.09759e-05
GCST90032396	rs10499262	C	A	C	A	-0.0224053	-0.000370252	0.140013	0.165205	FALSE	FALSE	FALSE	tqgYyd	0.00969131	0.969525	outcome	TRUE	reported	textfile	458440	0.00470713	1.9e-06	exposure	TRUE	reported	5BAWQV	textfile	5959	2	1	TRUE	0.00378763	22.6487	24.3422	NA	NA	0.0037889	5959	3.18383e-09	458440	TRUE	2.34081e-06
	rs141350591	A	G	A	G	0.0697422	0.0362314	0.0119288	0.0218578	FALSE	FALSE	FALSE	tqgYyd	0.0245449	0.139908	outcome	TRUE	reported	textfile	458440	0.014799	2.4e-06	exposure	TRUE	reported	5BAWQV	textfile	5959	2	1	TRUE	0.00371311	22.2014	24.3422	NA	NA	0.00371435	5959	4.75297e-06	458440	TRUE	6.42664e-06
	rs16861477	A	T	A	T	0.0327087	0.0322519	0.0571331	0.0761768	FALSE	TRUE	FALSE	tqgYyd	0.0135935	0.0176636	outcome	TRUE	reported	textfile	458440	0.00700288	3e-06	exposure	TRUE	reported	5BAWQV	textfile	5959	2	1	TRUE	0.00364765	21.8086	24.3422	NA	NA	0.00364887	5959	1.2279e-05	458440	TRUE	1.24937e-05
	rs33988153	C	T	C	T	-0.0171778	0.0114281	0.253588	0.246159	FALSE	FALSE	FALSE	tqgYyd	0.00836093	0.171676	outcome	TRUE	reported	textfile	458440	0.00372719	4.1e-06	exposure	TRUE	reported	5BAWQV	textfile	5959	2	1	TRUE	0.00355184	21.2337	24.3422	NA	NA	0.00355303	5959	4.07527e-06	458440	TRUE	9.81381e-06
	rs4486157	T	C	T	C	-0.0192752	-0.00705909	0.198093	0.275334	FALSE	FALSE	FALSE	tqgYyd	0.00805691	0.380947	outcome	TRUE	reported	textfile	458440	0.004089	2.4e-06	exposure	TRUE	reported	5BAWQV	textfile	5959	2	1	TRUE	0.00371513	22.2135	24.3422	NA	NA	0.00371637	5959	1.67448e-06	458440	TRUE	4.62612e-06
	rs7079743	A	G	A	G	-0.0159935	-0.0123038	0.318441	0.435777	FALSE	FALSE	FALSE	tqgYyd	0.0072566	0.0899725	outcome	TRUE	reported	textfile	458440	0.00346355	3.9e-06	exposure	TRUE	reported	5BAWQV	textfile	5959	2	1	TRUE	0.00356549	21.3156	24.3422	NA	NA	0.00356668	5959	6.27088e-06	458440	TRUE	1.1189e-05
	rs7371606	G	A	G	A	-0.0222986	-0.00140436	0.328615	0.233676	FALSE	FALSE	FALSE	tqgYyd	0.00864328	0.870928	outcome	TRUE	reported	textfile	458440	0.00346724	1.3e-10	exposure	TRUE	reported	5BAWQV	textfile	5959	2	1	TRUE	0.00689303	41.3468	24.3422	NA	NA	0.00689533	5959	5.75863e-08	458440	TRUE	1.97153e-10
	rs7807431	T	C	T	C	0.0176842	0.0176064	0.265385	0.214926	FALSE	FALSE	FALSE	tqgYyd	0.00875349	0.0442884	outcome	TRUE	reported	textfile	458440	0.00377232	2.8e-06	exposure	TRUE	reported	5BAWQV	textfile	5959	2	1	TRUE	0.00367436	21.9689	24.3422	NA	NA	0.00367559	5959	8.82458e-06	458440	TRUE	9.56892e-06
GCST90032413	rs10134381	C	G	C	G	-0.0410375	-0.0262747	0.183767	0.163876	FALSE	TRUE	FALSE	iNTT7k	0.00975592	0.00707685	outcome	TRUE	reported	textfile	458440	0.00742281	3.2e-08	exposure	TRUE	reported	WXhJGX	textfile	5959	2	1	TRUE	0.00510305	30.5548	23.4314	NA	NA	0.00510475	5959	1.58216e-05	458440	TRUE	2.1852e-07
	rs117794339	A	G	A	G	-0.124469	0.0172985	0.0116103	0.027948	FALSE	FALSE	FALSE	iNTT7k	0.0218139	0.427776	outcome	TRUE	reported	textfile	458440	0.0266031	2.9e-06	exposure	TRUE	reported	WXhJGX	textfile	5959	2	1	TRUE	0.00366009	21.8833	23.4314	NA	NA	0.00366132	5959	1.37173e-06	458440	TRUE	5.22359e-06
	rs145848388	A	G	A	G	-0.0695471	0.0204025	0.0421107	0.00877105	FALSE	FALSE	FALSE	iNTT7k	0.0384167	0.59536	outcome	TRUE	reported	textfile	458440	0.014165	9.1e-07	exposure	TRUE	reported	WXhJGX	textfile	5959	2	1	TRUE	0.00402901	24.0979	23.4314	NA	NA	0.00403036	5959	6.15242e-07	458440	TRUE	1.47672e-06
	rs147916135	G	A	G	A	-0.0534242	-0.138943	0.0630585	0.000104703	FALSE	FALSE	FALSE	iNTT7k	0.375367	0.711269	outcome	TRUE	reported	textfile	458440	0.0116768	4.8e-06	exposure	TRUE	reported	WXhJGX	textfile	5959	2	1	TRUE	0.00350052	20.9258	23.4314	NA	NA	0.00350169	5959	2.98869e-07	458440	TRUE	6.76822e-06
	rs149527935	A	G	A	G	-0.0862129	-0.0288704	0.0250259	0.0858706	FALSE	FALSE	FALSE	iNTT7k	0.0128575	0.0247412	outcome	TRUE	reported	textfile	458440	0.018443	2.9e-06	exposure	TRUE	reported	WXhJGX	textfile	5959	2	1	TRUE	0.00365358	21.8442	23.4314	NA	NA	0.0036548	5959	1.09978e-05	458440	TRUE	1.1494e-05
	rs28514714	T	C	T	C	-0.0310518	-0.00449994	0.362434	0.370272	FALSE	FALSE	FALSE	iNTT7k	0.0074568	0.546198	outcome	TRUE	reported	textfile	458440	0.00593332	1.7e-07	exposure	TRUE	reported	WXhJGX	textfile	5959	2	1	TRUE	0.00457523	27.3799	23.4314	NA	NA	0.00457676	5959	7.94379e-07	458440	TRUE	2.94336e-07
	rs35515607	C	A	C	A	-0.0274018	-0.0137904	0.363683	0.440953	FALSE	FALSE	FALSE	iNTT7k	0.00726023	0.0575056	outcome	TRUE	reported	textfile	458440	0.00591618	3.6e-06	exposure	TRUE	reported	WXhJGX	textfile	5959	2	1	TRUE	0.00358708	21.4452	23.4314	NA	NA	0.00358828	5959	7.8699e-06	458440	TRUE	1.16723e-05
	rs4667565	G	C	G	C	-0.0304536	0.00441561	0.25063	0.175169	FALSE	TRUE	FALSE	iNTT7k	0.00948387	0.641508	outcome	TRUE	reported	textfile	458440	0.0065543	3.4e-06	exposure	TRUE	reported	WXhJGX	textfile	5959	2	1	TRUE	0.00360978	21.5814	23.4314	NA	NA	0.00361099	5959	4.72857e-07	458440	TRUE	5.10165e-06
	rs62160533	A	T	A	T	0.087217	-0.0078665	0.0237404	0.0465873	FALSE	TRUE	FALSE	iNTT7k	0.0171275	0.646026	outcome	TRUE	reported	textfile	458440	0.0188286	3.6e-06	exposure	TRUE	reported	WXhJGX	textfile	5959	2	1	TRUE	0.00358783	21.4497	23.4314	NA	NA	0.00358903	5959	4.60145e-07	458440	TRUE	5.43653e-06
	rs74681494	C	T	C	T	0.0365431	0.0123539	0.193874	0.124806	FALSE	FALSE	FALSE	iNTT7k	0.010881	0.256224	outcome	TRUE	reported	textfile	458440	0.00728175	5.2e-07	exposure	TRUE	reported	WXhJGX	textfile	5959	2	1	TRUE	0.00420857	25.1764	23.4314	NA	NA	0.00420997	5959	2.81183e-06	458440	TRUE	1.21203e-06
	rs77788684	T	C	T	C	-0.122056	-0.0155217	0.0118243	0.0161504	FALSE	FALSE	FALSE	iNTT7k	0.0284205	0.584968	outcome	TRUE	reported	textfile	458440	0.0263762	3.7e-06	exposure	TRUE	reported	WXhJGX	textfile	5959	2	1	TRUE	0.00358066	21.4066	23.4314	NA	NA	0.00358185	5959	6.5063e-07	458440	TRUE	5.82211e-06
GCST90032415	rs11022321	C	T	C	T	-0.0314999	0.00278824	0.125411	0.128165	FALSE	FALSE	FALSE	YgzynD	0.0107419	0.795198	outcome	TRUE	reported	textfile	458440	0.0067643	3.2e-06	exposure	TRUE	reported	zJXM0h	textfile	5959	2	1	TRUE	0.00362595	21.6784	23.4903	NA	NA	0.00362716	5959	1.46966e-07	458440	TRUE	4.34327e-06
	rs116856501	C	T	C	T	-0.0684087	0.020427	0.0227196	0.0273133	FALSE	FALSE	FALSE	YgzynD	0.0220731	0.354746	outcome	TRUE	reported	textfile	458440	0.0149716	4.9e-06	exposure	TRUE	reported	zJXM0h	textfile	5959	2	1	TRUE	0.00349135	20.8709	23.4903	NA	NA	0.00349252	5959	1.8681e-06	458440	TRUE	9.33614e-06
	rs12169131	G	A	G	A	-0.0759473	0.0653247	0.0204718	0.0136572	FALSE	FALSE	FALSE	YgzynD	0.0310672	0.0354928	outcome	TRUE	reported	textfile	458440	0.0157749	1.5e-06	exposure	TRUE	reported	zJXM0h	textfile	5959	2	1	TRUE	0.00387465	23.171	23.4903	NA	NA	0.00387594	5959	9.64419e-06	458440	TRUE	5.5765e-06
	rs13082491	A	G	A	G	-0.0254739	0.0139781	0.22472	0.200084	FALSE	FALSE	FALSE	YgzynD	0.00897939	0.119544	outcome	TRUE	reported	textfile	458440	0.00540589	2.4e-06	exposure	TRUE	reported	zJXM0h	textfile	5959	2	1	TRUE	0.00371251	22.1978	23.4903	NA	NA	0.00371375	5959	5.28591e-06	458440	TRUE	6.72081e-06
	rs13261147	A	G	A	G	-0.0236229	0.00240573	0.294488	0.238135	FALSE	FALSE	FALSE	YgzynD	0.00845026	0.775879	outcome	TRUE	reported	textfile	458440	0.00487019	1.2e-06	exposure	TRUE	reported	zJXM0h	textfile	5959	2	1	TRUE	0.00393269	23.5195	23.4903	NA	NA	0.00393401	5959	1.76796e-07	458440	TRUE	1.72276e-06
	rs162646	A	C	A	C	-0.0378582	0.0122243	0.0791962	0.0618118	FALSE	FALSE	FALSE	YgzynD	0.0149781	0.414418	outcome	TRUE	reported	textfile	458440	0.00824024	4.3e-06	exposure	TRUE	reported	zJXM0h	textfile	5959	2	1	TRUE	0.00352965	21.1006	23.4903	NA	NA	0.00353083	5959	1.45296e-06	458440	TRUE	7.84946e-06
	rs1864927	T	C	T	C	-0.0251716	0.00694287	0.270232	0.226868	FALSE	FALSE	FALSE	YgzynD	0.00859377	0.419151	outcome	TRUE	reported	textfile	458440	0.00501672	5.2e-07	exposure	TRUE	reported	zJXM0h	textfile	5959	2	1	TRUE	0.00420705	25.1673	23.4903	NA	NA	0.00420846	5959	1.42374e-06	458440	TRUE	1.00915e-06
	rs2553044	G	A	G	A	-0.0257098	0.0203159	0.196075	0.196829	FALSE	FALSE	FALSE	YgzynD	0.00905707	0.0248909	outcome	TRUE	reported	textfile	458440	0.00555506	3.7e-06	exposure	TRUE	reported	zJXM0h	textfile	5959	2	1	TRUE	0.00358169	21.4128	23.4903	NA	NA	0.00358289	5959	1.09752e-05	458440	TRUE	1.41683e-05
	rs3790088	G	A	G	A	-0.0338653	-0.00418753	0.102988	0.120593	FALSE	FALSE	FALSE	YgzynD	0.0110518	0.704761	outcome	TRUE	reported	textfile	458440	0.00726429	3.1e-06	exposure	TRUE	reported	zJXM0h	textfile	5959	2	1	TRUE	0.00363387	21.7259	23.4903	NA	NA	0.00363508	5959	3.13162e-07	458440	TRUE	4.52284e-06
	rs4930241	G	A	G	A	-0.0332883	-0.00749374	0.131361	0.289216	FALSE	FALSE	FALSE	YgzynD	0.0079489	0.345814	outcome	TRUE	reported	textfile	458440	0.0065933	4.4e-07	exposure	TRUE	reported	zJXM0h	textfile	5959	2	1	TRUE	0.00425942	25.4819	23.4903	NA	NA	0.00426084	5959	1.93866e-06	458440	TRUE	9.31561e-07
	rs74497921	C	T	C	T	-0.0524619	0.00259015	0.0587443	0.0400194	FALSE	FALSE	FALSE	YgzynD	0.0183376	0.887674	outcome	TRUE	reported	textfile	458440	0.00952977	3.7e-08	exposure	TRUE	reported	zJXM0h	textfile	5959	2	1	TRUE	0.00505996	30.2954	23.4903	NA	NA	0.00506165	5959	4.35195e-08	458440	TRUE	5.07804e-08
	rs76264713	A	G	A	G	-0.034794	-0.00578366	0.0960299	0.130916	FALSE	FALSE	FALSE	YgzynD	0.010688	0.588415	outcome	TRUE	reported	textfile	458440	0.00755527	4.1e-06	exposure	TRUE	reported	zJXM0h	textfile	5959	2	1	TRUE	0.00354644	21.2013	23.4903	NA	NA	0.00354762	5959	6.38751e-07	458440	TRUE	6.44445e-06
	rs79740357	A	G	A	G	-0.0733025	0.0367986	0.026054	0.0195969	FALSE	FALSE	FALSE	YgzynD	0.0260988	0.158547	outcome	TRUE	reported	textfile	458440	0.0139628	1.5e-07	exposure	TRUE	reported	zJXM0h	textfile	5959	2	1	TRUE	0.00460379	27.5516	23.4903	NA	NA	0.00460532	5959	4.3365e-06	458440	TRUE	4.37347e-07
GCST90032420	rs113729517	C	A	C	A	0.0682541	-0.00344359	0.173087	0.270598	FALSE	FALSE	FALSE	hbjqry	0.00809119	0.670402	outcome	TRUE	reported	textfile	458440	0.014885	4.5e-06	exposure	TRUE	reported	S1Ywne	textfile	5959	2	1	TRUE	0.00351606	21.0191	24.84	NA	NA	0.00351724	5959	3.95109e-07	458440	TRUE	6.64755e-06
	rs117680904	T	C	T	C	-0.0914059	0.0143617	0.0942318	0.0865588	FALSE	FALSE	FALSE	hbjqry	0.0127797	0.261102	outcome	TRUE	reported	textfile	458440	0.0193654	2.4e-06	exposure	TRUE	reported	S1Ywne	textfile	5959	2	1	TRUE	0.00372479	22.2715	24.84	NA	NA	0.00372603	5959	2.75479e-06	458440	TRUE	5.13691e-06
	rs118080825	A	C	A	C	0.233439	-0.0392918	0.0152263	0.0208904	FALSE	FALSE	FALSE	hbjqry	0.0253685	0.12142	outcome	TRUE	reported	textfile	458440	0.0456914	3.2e-07	exposure	TRUE	reported	S1Ywne	textfile	5959	2	1	TRUE	0.0043612	26.0935	24.84	NA	NA	0.00436266	5959	5.23277e-06	458440	TRUE	9.74905e-07
	rs12658153	G	A	G	A	0.0869298	-0.00937134	0.182322	0.173673	FALSE	FALSE	FALSE	hbjqry	0.00951418	0.32463	outcome	TRUE	reported	textfile	458440	0.014506	2.1e-09	exposure	TRUE	reported	S1Ywne	textfile	5959	2	1	TRUE	0.00599045	35.9001	24.84	NA	NA	0.00599245	5959	2.11631e-06	458440	TRUE	5.34331e-09
	rs138223156	T	G	T	G	0.197281	0.00715807	0.0186782	0.0439709	FALSE	FALSE	FALSE	hbjqry	0.0175411	0.683219	outcome	TRUE	reported	textfile	458440	0.0417523	2.3e-06	exposure	TRUE	reported	S1Ywne	textfile	5959	2	1	TRUE	0.00373261	22.3184	24.84	NA	NA	0.00373386	5959	3.63243e-07	458440	TRUE	3.39912e-06
	rs144195999	T	C	T	C	0.265196	-0.0583739	0.0103344	0.0155964	FALSE	FALSE	FALSE	hbjqry	0.0292286	0.0458089	outcome	TRUE	reported	textfile	458440	0.055209	1.6e-06	exposure	TRUE	reported	S1Ywne	textfile	5959	2	1	TRUE	0.00385711	23.0658	24.84	NA	NA	0.0038584	5959	8.70036e-06	458440	TRUE	5.54753e-06
	rs2728542	T	C	T	C	0.0523964	-0.00770442	0.422973	0.507048	FALSE	FALSE	FALSE	hbjqry	0.00720202	0.284728	outcome	TRUE	reported	textfile	458440	0.0113795	4.1e-06	exposure	TRUE	reported	S1Ywne	textfile	5959	2	1	TRUE	0.0035452	21.1939	24.84	NA	NA	0.00354639	5959	2.49626e-06	458440	TRUE	8.56342e-06
	rs57583441	T	C	T	C	0.159791	0.00316685	0.0322771	0.0202906	FALSE	FALSE	FALSE	hbjqry	0.0255103	0.901204	outcome	TRUE	reported	textfile	458440	0.0316505	4.5e-07	exposure	TRUE	reported	S1Ywne	textfile	5959	2	1	TRUE	0.00425909	25.4799	24.84	NA	NA	0.00426051	5959	3.36158e-08	458440	TRUE	5.7904e-07
	rs6585999	C	T	C	T	0.133952	0.00529622	0.0539315	0.00655484	FALSE	FALSE	FALSE	hbjqry	0.0450617	0.906438	outcome	TRUE	reported	textfile	458440	0.0247545	6.3e-08	exposure	TRUE	reported	S1Ywne	textfile	5959	2	1	TRUE	0.00488976	29.2715	24.84	NA	NA	0.0048914	5959	3.01326e-08	458440	TRUE	8.40321e-08
	rs746763	G	C	G	C	0.0564573	-0.00481444	0.32191	0.320703	FALSE	TRUE	FALSE	hbjqry	0.00770823	0.532243	outcome	TRUE	reported	textfile	458440	0.0120096	2.6e-06	exposure	TRUE	reported	S1Ywne	textfile	5959	2	1	TRUE	0.00369489	22.0921	24.84	NA	NA	0.00369613	5959	8.50945e-07	458440	TRUE	4.29107e-06
	rs79581324	T	G	T	G	-0.0849552	0.00252998	0.122063	0.136424	FALSE	FALSE	FALSE	hbjqry	0.0104863	0.809349	outcome	TRUE	reported	textfile	458440	0.0171486	7.3e-07	exposure	TRUE	reported	S1Ywne	textfile	5959	2	1	TRUE	0.0041017	24.5345	24.84	NA	NA	0.00410307	5959	1.26972e-07	458440	TRUE	1.00284e-06
GCST90032444	rs140405800	T	C	T	C	0.209394	0.00047508	0.0244538	0.0206428	FALSE	FALSE	FALSE	XyShyu	0.0253533	0.98505	outcome	TRUE	reported	textfile	458440	0.042522	8.5e-07	exposure	TRUE	reported	12C0Fr	textfile	5959	2	1	TRUE	0.00405288	24.2413	23.6837	NA	NA	0.00405424	5959	7.65921e-10	458440	TRUE	1.02466e-06
	rs187716232	T	G	T	G	-0.370633	0.0641974	0.0106007	0.0204225	FALSE	FALSE	FALSE	XyShyu	0.0254327	0.011596	outcome	TRUE	reported	textfile	458440	0.0644227	8.8e-09	exposure	TRUE	reported	12C0Fr	textfile	5959	2	1	TRUE	0.00552372	33.0875	23.6837	NA	NA	0.00552556	5959	1.38984e-05	458440	TRUE	5.81143e-08
	rs28519639	G	C	G	C	-0.0783989	-0.000994624	0.189088	0.276086	FALSE	TRUE	FALSE	XyShyu	0.0080521	0.901693	outcome	TRUE	reported	textfile	458440	0.0168725	3.4e-06	exposure	TRUE	reported	12C0Fr	textfile	5959	2	1	TRUE	0.00361008	21.5832	23.6837	NA	NA	0.00361129	5959	3.32827e-08	458440	TRUE	4.23515e-06
	rs4448900	G	A	G	A	0.0883493	-0.00679317	0.15521	0.266637	FALSE	FALSE	FALSE	XyShyu	0.0081451	0.40427	outcome	TRUE	reported	textfile	458440	0.0180657	1e-06	exposure	TRUE	reported	12C0Fr	textfile	5959	2	1	TRUE	0.00399746	23.9084	23.6837	NA	NA	0.00399879	5959	1.5173e-06	458440	TRUE	1.92753e-06
	rs4741606	A	C	A	C	0.0795718	-0.00580861	0.189965	0.166489	FALSE	FALSE	FALSE	XyShyu	0.0096447	0.547002	outcome	TRUE	reported	textfile	458440	0.016899	2.5e-06	exposure	TRUE	reported	12C0Fr	textfile	5959	2	1	TRUE	0.00370689	22.1641	23.6837	NA	NA	0.00370813	5959	7.912e-07	458440	TRUE	4.08752e-06
	rs67716376	T	C	T	C	-0.0754015	0.00387295	0.218109	0.332167	FALSE	FALSE	FALSE	XyShyu	0.00763971	0.61219	outcome	TRUE	reported	textfile	458440	0.0159781	2.4e-06	exposure	TRUE	reported	12C0Fr	textfile	5959	2	1	TRUE	0.0037232	22.262	23.6837	NA	NA	0.00372445	5959	5.60595e-07	458440	TRUE	3.69263e-06
	rs7548374	T	C	T	C	0.088519	-0.00525999	0.132625	0.217515	FALSE	FALSE	FALSE	XyShyu	0.00873419	0.547021	outcome	TRUE	reported	textfile	458440	0.0192878	4.4e-06	exposure	TRUE	reported	12C0Fr	textfile	5959	2	1	TRUE	0.0035221	21.0553	23.6837	NA	NA	0.00352328	5959	7.91122e-07	458440	TRUE	7.16977e-06
	rs78673225	C	T	C	T	0.160025	0.00289237	0.0352634	0.0436328	FALSE	FALSE	FALSE	XyShyu	0.0176357	0.869726	outcome	TRUE	reported	textfile	458440	0.0347757	4.2e-06	exposure	TRUE	reported	12C0Fr	textfile	5959	2	1	TRUE	0.00354087	21.1679	23.6837	NA	NA	0.00354205	5959	5.86735e-08	458440	TRUE	5.35523e-06
GCST90032453	rs112870369	A	T	A	T	0.299342	-0.0364251	0.0260003	0.0271082	FALSE	TRUE	FALSE	XO75LP	0.0221924	0.100728	outcome	TRUE	reported	textfile	458440	0.0630334	2e-06	exposure	TRUE	reported	XxhkCv	textfile	5959	2	1	TRUE	0.00377033	22.5449	22.5337	NA	NA	0.0037716	5959	5.87638e-06	458440	TRUE	5.92231e-06
	rs114554434	T	C	T	C	0.367763	-0.0353333	0.0179323	0.0222766	FALSE	FALSE	FALSE	XO75LP	0.0242871	0.145719	outcome	TRUE	reported	textfile	458440	0.0750418	9.5e-07	exposure	TRUE	reported	XxhkCv	textfile	5959	2	1	TRUE	0.0040143	24.0095	22.5337	NA	NA	0.00401564	5959	4.61673e-06	458440	TRUE	2.59124e-06
	rs73530148	T	C	T	C	-0.270775	0.0206778	0.0297005	0.066494	FALSE	FALSE	FALSE	XO75LP	0.0144167	0.151488	outcome	TRUE	reported	textfile	458440	0.058542	3.7e-06	exposure	TRUE	reported	XxhkCv	textfile	5959	2	1	TRUE	0.00357727	21.3863	22.5337	NA	NA	0.00357847	5959	4.4874e-06	458440	TRUE	9.42368e-06
	rs76839937	G	C	G	C	-0.192945	-0.0107307	0.0631489	0.0364235	FALSE	TRUE	FALSE	XO75LP	0.0192844	0.577907	outcome	TRUE	reported	textfile	458440	0.0409488	2.5e-06	exposure	TRUE	reported	XxhkCv	textfile	5959	2	1	TRUE	0.0037119	22.1942	22.5337	NA	NA	0.00371314	5959	6.75403e-07	458440	TRUE	3.92653e-06
GCST90032460	rs116988601	C	T	C	T	0.141706	-0.0627632	0.0195418	0.035539	FALSE	FALSE	FALSE	mY4mQY	0.0196786	0.00142564	outcome	TRUE	reported	textfile	458440	0.0298059	2e-06	exposure	TRUE	reported	cGhZAf	textfile	5959	2	1	TRUE	0.0037788	22.5957	23.7917	NA	NA	0.00378007	5959	2.21887e-05	458440	TRUE	1.30579e-05
	rs144958708	T	C	T	C	0.117332	-0.00592952	0.0397698	0.0154153	FALSE	FALSE	FALSE	mY4mQY	0.0291453	0.838786	outcome	TRUE	reported	textfile	458440	0.0214757	4.7e-08	exposure	TRUE	reported	cGhZAf	textfile	5959	2	1	TRUE	0.00498419	29.8396	23.7917	NA	NA	0.00498586	5959	9.02862e-08	458440	TRUE	6.65258e-08
	rs2241919	G	A	G	A	0.0623018	-0.0196269	0.146001	0.155388	FALSE	FALSE	FALSE	mY4mQY	0.00992597	0.0480054	outcome	TRUE	reported	textfile	458440	0.0120211	2.2e-07	exposure	TRUE	reported	cGhZAf	textfile	5959	2	1	TRUE	0.00448731	26.8514	23.7917	NA	NA	0.00448881	5959	8.52851e-06	458440	TRUE	8.60426e-07
	rs2859868	G	A	G	A	-0.0388289	0.011476	0.439587	0.450258	FALSE	FALSE	FALSE	mY4mQY	0.00724074	0.112985	outcome	TRUE	reported	textfile	458440	0.00833031	3.1e-06	exposure	TRUE	reported	cGhZAf	textfile	5959	2	1	TRUE	0.00363274	21.7191	23.7917	NA	NA	0.00363395	5959	5.47939e-06	458440	TRUE	8.6479e-06
	rs4684157	A	G	A	G	-0.0454008	0.00469419	0.245372	0.276407	FALSE	FALSE	FALSE	mY4mQY	0.00805072	0.559841	outcome	TRUE	reported	textfile	458440	0.00960881	2.3e-06	exposure	TRUE	reported	cGhZAf	textfile	5959	2	1	TRUE	0.00373242	22.3173	23.7917	NA	NA	0.00373367	5959	7.41602e-07	458440	TRUE	3.74304e-06
	rs6778770	G	A	G	A	0.0571936	-0.0115985	0.165606	0.243811	FALSE	FALSE	FALSE	mY4mQY	0.0084022	0.167461	outcome	TRUE	reported	textfile	458440	0.0115978	8.2e-07	exposure	TRUE	reported	cGhZAf	textfile	5959	2	1	TRUE	0.00406445	24.3107	23.7917	NA	NA	0.00406581	5959	4.15657e-06	458440	TRUE	2.14115e-06
	rs74376597	A	G	A	G	-0.0774295	0.0224972	0.0721975	0.0411297	FALSE	FALSE	FALSE	mY4mQY	0.0180866	0.213552	outcome	TRUE	reported	textfile	458440	0.0162827	2e-06	exposure	TRUE	reported	cGhZAf	textfile	5959	2	1	TRUE	0.00378043	22.6055	23.7917	NA	NA	0.0037817	5959	3.3749e-06	458440	TRUE	4.63901e-06
	rs7522260	C	T	C	T	-0.040171	0.0111689	0.38482	0.315031	FALSE	FALSE	FALSE	mY4mQY	0.00775008	0.149546	outcome	TRUE	reported	textfile	458440	0.00853039	2.5e-06	exposure	TRUE	reported	cGhZAf	textfile	5959	2	1	TRUE	0.00370767	22.1688	23.7917	NA	NA	0.00370891	5959	4.53029e-06	458440	TRUE	6.41072e-06
	rs76326848	T	G	T	G	0.0910121	0.0277839	0.046559	0.047353	FALSE	FALSE	FALSE	mY4mQY	0.0169658	0.101496	outcome	TRUE	reported	textfile	458440	0.0195266	3.1e-06	exposure	TRUE	reported	cGhZAf	textfile	5959	2	1	TRUE	0.00363238	21.717	23.7917	NA	NA	0.00363359	5959	5.84998e-06	458440	TRUE	8.90089e-06
GCST90032497	rs10032258	T	A	T	A	0.0278558	0.00452573	0.26483	0.271599	FALSE	TRUE	FALSE	Yv7le2	0.00811738	0.577162	outcome	TRUE	reported	textfile	458440	0.00605386	4.2e-06	exposure	TRUE	reported	1GwPBK	textfile	5959	2	1	TRUE	0.0035404	21.1651	22.7101	NA	NA	0.00354159	5959	6.78055e-07	458440	TRUE	6.62171e-06
	rs11649290	T	A	T	A	0.028908	0.0270126	0.247335	0.28488	FALSE	TRUE	FALSE	Yv7le2	0.00795394	0.000683471	outcome	TRUE	reported	textfile	458440	0.0061933	3e-06	exposure	TRUE	reported	1GwPBK	textfile	5959	2	1	TRUE	0.00364279	21.7794	22.7101	NA	NA	0.003644	5959	2.5158e-05	458440	TRUE	2.13982e-05
	rs58686486	C	T	C	T	-0.0477945	-0.0291902	0.0986046	0.0490402	FALSE	FALSE	FALSE	Yv7le2	0.0166942	0.0803748	outcome	TRUE	reported	textfile	458440	0.0087468	4.6e-08	exposure	TRUE	reported	1GwPBK	textfile	5959	2	1	TRUE	0.00498555	29.8478	22.7101	NA	NA	0.00498722	5959	6.66898e-06	458440	TRUE	1.73146e-07
	rs61901730	C	T	C	T	-0.0541863	-0.00389044	0.0563321	0.0539111	FALSE	FALSE	FALSE	Yv7le2	0.0159275	0.807029	outcome	TRUE	reported	textfile	458440	0.0114956	2.4e-06	exposure	TRUE	reported	1GwPBK	textfile	5959	2	1	TRUE	0.00371472	22.2111	22.7101	NA	NA	0.00371596	5959	1.30143e-07	458440	TRUE	3.28142e-06
	rs6904492	C	T	C	T	0.031175	0.015536	0.204775	0.278463	FALSE	FALSE	FALSE	Yv7le2	0.00806675	0.0541128	outcome	TRUE	reported	textfile	458440	0.00657709	2.1e-06	exposure	TRUE	reported	1GwPBK	textfile	5959	2	1	TRUE	0.0037561	22.4595	22.7101	NA	NA	0.00375736	5959	8.09091e-06	458440	TRUE	7.19e-06
	rs72833081	C	A	C	A	-0.124523	-0.00988905	0.00966593	0.0575462	FALSE	FALSE	FALSE	Yv7le2	0.0154608	0.522419	outcome	TRUE	reported	textfile	458440	0.0268286	3.5e-06	exposure	TRUE	reported	1GwPBK	textfile	5959	2	1	TRUE	0.00360216	21.5356	22.7101	NA	NA	0.00360336	5959	8.9241e-07	458440	TRUE	5.73395e-06
	rs76953952	A	G	A	G	0.0783546	-0.013213	0.0245131	0.0383911	FALSE	FALSE	FALSE	Yv7le2	0.0187575	0.481177	outcome	TRUE	reported	textfile	458440	0.016933	3.7e-06	exposure	TRUE	reported	1GwPBK	textfile	5959	2	1	TRUE	0.00358039	21.405	22.7101	NA	NA	0.00358159	5959	1.08236e-06	458440	TRUE	6.34206e-06
	rs77121201	G	A	G	A	0.0441199	0.01833	0.0826692	0.106158	FALSE	FALSE	FALSE	Yv7le2	0.0117054	0.117361	outcome	TRUE	reported	textfile	458440	0.00950493	3.5e-06	exposure	TRUE	reported	1GwPBK	textfile	5959	2	1	TRUE	0.00360272	21.539	22.7101	NA	NA	0.00360392	5959	5.34896e-06	458440	TRUE	9.36124e-06
	rs9357436	A	G	A	G	0.0299209	0.0041577	0.22107	0.146687	FALSE	FALSE	FALSE	Yv7le2	0.010202	0.683614	outcome	TRUE	reported	textfile	458440	0.00631411	2.2e-06	exposure	TRUE	reported	1GwPBK	textfile	5959	2	1	TRUE	0.00375421	22.4481	22.7101	NA	NA	0.00375546	5959	3.62289e-07	458440	TRUE	3.18137e-06
GCST90032544	rs112435825	T	C	T	C	0.0702669	-0.0293232	0.0358526	0.0340361	FALSE	FALSE	FALSE	WjweWK	0.0199037	0.140682	outcome	TRUE	reported	textfile	458440	0.0150659	3.1e-06	exposure	TRUE	reported	GnbZ0D	textfile	5959	2	1	TRUE	0.0036371	21.7453	22.8444	NA	NA	0.00363832	5959	4.73448e-06	458440	TRUE	8.04751e-06
	rs117684381	A	T	A	T	0.0598415	-0.0164631	0.0513295	0.0152288	FALSE	TRUE	FALSE	WjweWK	0.0294796	0.576533	outcome	TRUE	reported	textfile	458440	0.0127173	2.5e-06	exposure	TRUE	reported	GnbZ0D	textfile	5959	2	1	TRUE	0.00370195	22.1345	22.8444	NA	NA	0.00370319	5959	6.80298e-07	458440	TRUE	4.05158e-06
	rs4802988	C	T	C	T	-0.0321018	0.0141688	0.257143	0.289904	FALSE	FALSE	FALSE	WjweWK	0.00793054	0.0739997	outcome	TRUE	reported	textfile	458440	0.00646424	6.8e-07	exposure	TRUE	reported	GnbZ0D	textfile	5959	2	1	TRUE	0.00412151	24.6535	22.8444	NA	NA	0.00412289	5959	6.96269e-06	458440	TRUE	2.26779e-06
GCST90032545	rs114681056	A	G	A	G	-0.0461479	0.0274043	0.0681857	0.036309	FALSE	FALSE	FALSE	wOwYyK	0.0191966	0.153419	outcome	TRUE	reported	textfile	458440	0.010091	4.8e-06	exposure	TRUE	reported	dt3zai	textfile	5959	2	1	TRUE	0.00349736	20.9069	22.8302	NA	NA	0.00349853	5959	4.44535e-06	458440	TRUE	1.19199e-05
	rs11671988	A	G	A	G	-0.0255315	-5.23722e-05	0.343576	0.2544	FALSE	FALSE	FALSE	wOwYyK	0.00826776	0.994946	outcome	TRUE	reported	textfile	458440	0.00535657	1.9e-06	exposure	TRUE	reported	dt3zai	textfile	5959	2	1	TRUE	0.00379798	22.7108	22.8302	NA	NA	0.00379925	5959	8.75277e-11	458440	TRUE	2.2275e-06
	rs147653720	T	G	T	G	0.0490926	0.0348033	0.0616346	0.0352151	FALSE	FALSE	FALSE	wOwYyK	0.0195303	0.0747464	outcome	TRUE	reported	textfile	458440	0.0105651	3.4e-06	exposure	TRUE	reported	dt3zai	textfile	5959	2	1	TRUE	0.00361028	21.5844	22.8302	NA	NA	0.00361149	5959	6.92691e-06	458440	TRUE	1.02515e-05
	rs17166688	T	C	T	C	0.122462	-0.0273915	0.0108586	0.0306027	FALSE	FALSE	FALSE	wOwYyK	0.020888	0.18974	outcome	TRUE	reported	textfile	458440	0.0242744	4.5e-07	exposure	TRUE	reported	dt3zai	textfile	5959	2	1	TRUE	0.00425286	25.4425	22.8302	NA	NA	0.00425428	5959	3.75107e-06	458440	TRUE	1.17412e-06
	rs2676071	C	T	C	T	0.0257688	-0.00342202	0.372115	0.401	FALSE	FALSE	FALSE	wOwYyK	0.00734349	0.64122	outcome	TRUE	reported	textfile	458440	0.00522028	8e-07	exposure	TRUE	reported	dt3zai	textfile	5959	2	1	TRUE	0.00407244	24.3588	22.8302	NA	NA	0.00407381	5959	4.73674e-07	458440	TRUE	1.24707e-06
	rs2716562	T	C	T	C	-0.0318701	0.0229008	0.173511	0.199495	FALSE	FALSE	FALSE	wOwYyK	0.00901087	0.0110388	outcome	TRUE	reported	textfile	458440	0.00667896	1.8e-06	exposure	TRUE	reported	dt3zai	textfile	5959	2	1	TRUE	0.00380644	22.7616	22.8302	NA	NA	0.00380772	5959	1.4089e-05	458440	TRUE	8.59552e-06
	rs309022	A	C	A	C	-0.0262873	0.00317004	0.343994	0.356942	FALSE	FALSE	FALSE	wOwYyK	0.00751962	0.673339	outcome	TRUE	reported	textfile	458440	0.00536221	9.5e-07	exposure	TRUE	reported	dt3zai	textfile	5959	2	1	TRUE	0.00401683	24.0247	22.8302	NA	NA	0.00401817	5959	3.87665e-07	458440	TRUE	1.44014e-06
	rs337092	C	T	C	T	-0.0247594	0.00484178	0.374552	0.334443	FALSE	FALSE	FALSE	wOwYyK	0.0076299	0.525702	outcome	TRUE	reported	textfile	458440	0.00529987	3e-06	exposure	TRUE	reported	dt3zai	textfile	5959	2	1	TRUE	0.00364912	21.8175	22.8302	NA	NA	0.00365035	5959	8.78398e-07	458440	TRUE	4.95792e-06
	rs72991239	A	G	A	G	-0.0480691	0.00269407	0.0695542	0.125384	FALSE	FALSE	FALSE	wOwYyK	0.0108857	0.804532	outcome	TRUE	reported	textfile	458440	0.00993259	1.3e-06	exposure	TRUE	reported	dt3zai	textfile	5959	2	1	TRUE	0.00391498	23.4132	22.8302	NA	NA	0.00391629	5959	1.33606e-07	458440	TRUE	1.78087e-06
	rs7763764	A	G	A	G	-0.0244752	0.00757925	0.347372	0.405592	FALSE	FALSE	FALSE	wOwYyK	0.00732673	0.300919	outcome	TRUE	reported	textfile	458440	0.00530458	4e-06	exposure	TRUE	reported	dt3zai	textfile	5959	2	1	TRUE	0.00355982	21.2816	22.8302	NA	NA	0.00356101	5959	2.33427e-06	458440	TRUE	8.04327e-06
GCST90032590	rs11244001	G	C	G	C	-0.101303	0.0261245	0.0149493	0.0390182	FALSE	TRUE	FALSE	M5Ow1C	0.0186133	0.160456	outcome	TRUE	reported	textfile	458440	0.0217323	3.1e-06	exposure	TRUE	reported	fkyS2r	textfile	5959	2	1	TRUE	0.00363311	21.7214	22.0668	NA	NA	0.00363433	5959	4.29701e-06	458440	TRUE	7.84887e-06
	rs113064681	A	G	A	G	-0.066578	0.00715802	0.0368217	0.0215601	FALSE	FALSE	FALSE	M5Ow1C	0.0245828	0.770914	outcome	TRUE	reported	textfile	458440	0.0142071	2.8e-06	exposure	TRUE	reported	fkyS2r	textfile	5959	2	1	TRUE	0.00367181	21.9536	22.0668	NA	NA	0.00367303	5959	1.84945e-07	458440	TRUE	3.83967e-06
	rs117055780	A	G	A	G	-0.121142	-0.0268804	0.0108622	0.0173807	FALSE	FALSE	FALSE	M5Ow1C	0.0276115	0.330296	outcome	TRUE	reported	textfile	458440	0.0260748	3.4e-06	exposure	TRUE	reported	fkyS2r	textfile	5959	2	1	TRUE	0.00360914	21.5775	22.0668	NA	NA	0.00361035	5959	2.06733e-06	458440	TRUE	6.7117e-06
	rs118079798	A	G	A	G	0.0619771	-0.0298062	0.0443283	0.0336838	FALSE	FALSE	FALSE	M5Ow1C	0.0199415	0.134998	outcome	TRUE	reported	textfile	458440	0.013034	2e-06	exposure	TRUE	reported	fkyS2r	textfile	5959	2	1	TRUE	0.00377998	22.6028	22.0668	NA	NA	0.00378124	5959	4.87321e-06	458440	TRUE	5.31911e-06
	rs150502657	G	C	G	C	-0.0866614	-0.00219071	0.0209773	0.0160512	FALSE	TRUE	FALSE	M5Ow1C	0.0286575	0.939066	outcome	TRUE	reported	textfile	458440	0.0188776	4.4e-06	exposure	TRUE	reported	fkyS2r	textfile	5959	2	1	TRUE	0.00352412	21.0675	22.0668	NA	NA	0.0035253	5959	1.27471e-08	458440	TRUE	5.37885e-06
	rs152253	A	G	A	G	-0.062379	0.0106796	0.0428305	0.071125	FALSE	FALSE	FALSE	M5Ow1C	0.0140278	0.446469	outcome	TRUE	reported	textfile	458440	0.0132883	2.7e-06	exposure	TRUE	reported	fkyS2r	textfile	5959	2	1	TRUE	0.00368436	22.0289	22.0668	NA	NA	0.00368559	5959	1.2643e-06	458440	TRUE	4.77132e-06
	rs3795915	G	T	G	T	-0.0344852	-0.00243417	0.172376	0.199494	FALSE	FALSE	FALSE	M5Ow1C	0.00901312	0.787106	outcome	TRUE	reported	textfile	458440	0.00710555	1.2e-06	exposure	TRUE	reported	fkyS2r	textfile	5959	2	1	TRUE	0.00393716	23.5464	22.0668	NA	NA	0.00393848	5959	1.591e-07	458440	TRUE	1.68542e-06
	rs8106720	T	C	T	C	-0.0865397	0.0691811	0.0212784	0.0364388	FALSE	FALSE	FALSE	M5Ow1C	0.0188872	0.000249425	outcome	TRUE	reported	textfile	458440	0.0183645	2.4e-06	exposure	TRUE	reported	fkyS2r	textfile	5959	2	1	TRUE	0.00371265	22.1987	22.0668	NA	NA	0.00371389	5959	2.92649e-05	458440	TRUE	2.0088e-05
	rs915896	T	A	T	A	-0.0329166	0.0222001	0.181749	0.311254	FALSE	TRUE	FALSE	M5Ow1C	0.00776854	0.00426737	outcome	TRUE	reported	textfile	458440	0.00703186	2.9e-06	exposure	TRUE	reported	fkyS2r	textfile	5959	2	1	TRUE	0.00366372	21.905	22.0668	NA	NA	0.00366494	5959	1.78132e-05	458440	TRUE	1.53167e-05
GCST90032591	rs11153022	C	G	C	G	-0.0307641	0.0146829	0.335402	0.360552	FALSE	TRUE	FALSE	uliNco	0.00749452	0.0500956	outcome	TRUE	reported	textfile	458440	0.00488635	3.1e-10	exposure	TRUE	reported	w6mnvM	textfile	5959	2	1	TRUE	0.00660795	39.6254	25.4058	NA	NA	0.00661015	5959	8.37244e-06	458440	TRUE	1.67953e-09
	rs112643363	T	C	T	C	-0.0505669	0.00585844	0.0451261	0.0643127	FALSE	FALSE	FALSE	uliNco	0.0146963	0.690164	outcome	TRUE	reported	textfile	458440	0.0108965	3.5e-06	exposure	TRUE	reported	w6mnvM	textfile	5959	2	1	TRUE	0.00360096	21.5285	25.4058	NA	NA	0.00360217	5959	3.46631e-07	458440	TRUE	5.05493e-06
	rs113883921	G	A	G	A	-0.061033	0.00427945	0.0333617	0.027683	FALSE	FALSE	FALSE	uliNco	0.0220397	0.846043	outcome	TRUE	reported	textfile	458440	0.0125715	1.2e-06	exposure	TRUE	reported	w6mnvM	textfile	5959	2	1	TRUE	0.00393974	23.5619	25.4058	NA	NA	0.00394106	5959	8.22402e-08	458440	TRUE	1.60204e-06
	rs117217513	T	G	T	G	-0.0686009	0.00801601	0.0253751	0.00617202	FALSE	FALSE	FALSE	uliNco	0.0458388	0.861179	outcome	TRUE	reported	textfile	458440	0.0144773	2.2e-06	exposure	TRUE	reported	w6mnvM	textfile	5959	2	1	TRUE	0.00375386	22.446	25.4058	NA	NA	0.00375511	5959	6.67067e-08	458440	TRUE	2.80126e-06
	rs138652347	C	T	C	T	-0.0999157	0.0594676	0.0126348	0.00917568	FALSE	FALSE	FALSE	uliNco	0.0377096	0.114798	outcome	TRUE	reported	textfile	458440	0.0204295	1e-06	exposure	TRUE	reported	w6mnvM	textfile	5959	2	1	TRUE	0.00399796	23.9115	25.4058	NA	NA	0.0039993	5959	5.42468e-06	458440	TRUE	2.91037e-06
	rs73145798	G	A	G	A	0.0289513	-0.0127508	0.15577	0.0732604	FALSE	FALSE	FALSE	uliNco	0.0138078	0.355771	outcome	TRUE	reported	textfile	458440	0.00626296	3.8e-06	exposure	TRUE	reported	w6mnvM	textfile	5959	2	1	TRUE	0.00357313	21.3615	25.4058	NA	NA	0.00357433	5959	1.86014e-06	458440	TRUE	7.28534e-06
GCST90032609	rs117472695	C	T	C	T	0.0969509	0.0232913	0.0218418	0.0479321	FALSE	FALSE	FALSE	LiBLeX	0.0168775	0.16758	outcome	TRUE	reported	textfile	458440	0.0194348	6.1e-07	exposure	TRUE	reported	PpE0gm	textfile	5959	2	1	TRUE	0.00415873	24.877	26.7291	NA	NA	0.00416012	5959	4.15421e-06	458440	TRUE	1.61638e-06
	rs117518675	T	C	T	C	0.0604668	0.00489116	0.0545943	0.0407567	FALSE	FALSE	FALSE	LiBLeX	0.0181583	0.787649	outcome	TRUE	reported	textfile	458440	0.0123436	9.7e-07	exposure	TRUE	reported	PpE0gm	textfile	5959	2	1	TRUE	0.0040108	23.9886	26.7291	NA	NA	0.00401215	5959	1.58268e-07	458440	TRUE	1.34527e-06
	rs541713	G	A	G	A	-0.0403461	-0.0156089	0.153245	0.174736	FALSE	FALSE	FALSE	LiBLeX	0.00956825	0.102822	outcome	TRUE	reported	textfile	458440	0.00794189	3.8e-07	exposure	TRUE	reported	PpE0gm	textfile	5959	2	1	TRUE	0.00431226	25.7994	26.7291	NA	NA	0.0043137	5959	5.80492e-06	458440	TRUE	1.18174e-06
	rs6417145	C	T	C	T	0.143688	0.0491225	0.0126518	0.034359	FALSE	FALSE	FALSE	LiBLeX	0.0197728	0.012979	outcome	TRUE	reported	textfile	458440	0.0252973	1.3e-08	exposure	TRUE	reported	PpE0gm	textfile	5959	2	1	TRUE	0.00538486	32.2513	26.7291	NA	NA	0.00538666	5959	1.34629e-05	458440	TRUE	8.48361e-08
GCST90032635	rs117047925	A	G	A	G	0.136032	-0.00764231	0.0131512	0.0591222	FALSE	FALSE	FALSE	AXUIws	0.0152644	0.616608	outcome	TRUE	reported	textfile	458440	0.0295528	4.2e-06	exposure	TRUE	reported	BrGXH4	textfile	5959	2	1	TRUE	0.00354299	21.1806	23.7655	NA	NA	0.00354418	5959	5.46775e-07	458440	TRUE	6.37325e-06
	rs140978838	C	T	C	T	-0.0660043	-0.00276259	0.0617821	0.0322921	FALSE	FALSE	FALSE	AXUIws	0.0204128	0.892346	outcome	TRUE	reported	textfile	458440	0.0141036	2.9e-06	exposure	TRUE	reported	BrGXH4	textfile	5959	2	1	TRUE	0.003662	21.8947	23.7655	NA	NA	0.00366322	5959	3.99528e-08	458440	TRUE	3.63391e-06
	rs17459831	A	G	A	G	0.0630183	-0.0187901	0.0686391	0.0965263	FALSE	FALSE	FALSE	AXUIws	0.0121769	0.122808	outcome	TRUE	reported	textfile	458440	0.0132559	2e-06	exposure	TRUE	reported	BrGXH4	textfile	5959	2	1	TRUE	0.00377831	22.5928	23.7655	NA	NA	0.00377957	5959	5.194e-06	458440	TRUE	5.4866e-06
	rs6434500	G	C	G	C	-0.066524	-0.000168876	0.060724	0.0468131	FALSE	TRUE	FALSE	AXUIws	0.0170904	0.992116	outcome	TRUE	reported	textfile	458440	0.0140055	2e-06	exposure	TRUE	reported	BrGXH4	textfile	5959	2	1	TRUE	0.00377177	22.5535	23.7655	NA	NA	0.00377303	5959	2.12986e-10	458440	TRUE	2.41946e-06
	rs6743333	A	G	A	G	-0.0474992	0.0175961	0.194071	0.287575	FALSE	FALSE	FALSE	AXUIws	0.00795561	0.0269811	outcome	TRUE	reported	textfile	458440	0.0085419	2.7e-08	exposure	TRUE	reported	BrGXH4	textfile	5959	2	1	TRUE	0.00516229	30.9113	23.7655	NA	NA	0.00516402	5959	1.06709e-05	458440	TRUE	1.36988e-07
	rs6972820	T	C	T	C	-0.0331528	-0.000874431	0.419493	0.435039	FALSE	FALSE	FALSE	AXUIws	0.00727277	0.904298	outcome	TRUE	reported	textfile	458440	0.00680384	1.1e-06	exposure	TRUE	reported	BrGXH4	textfile	5959	2	1	TRUE	0.00396855	23.7348	23.7655	NA	NA	0.00396988	5959	3.15334e-08	458440	TRUE	1.40651e-06
	rs7311655	T	G	T	G	0.0327977	-0.0129324	0.448122	0.4916	FALSE	FALSE	FALSE	AXUIws	0.00719997	0.072467	outcome	TRUE	reported	textfile	458440	0.00676583	1.2e-06	exposure	TRUE	reported	BrGXH4	textfile	5959	2	1	TRUE	0.00392791	23.4909	23.7655	NA	NA	0.00392923	5959	7.03742e-06	458440	TRUE	4.03863e-06
GCST90032639	rs114698862	G	A	G	A	-0.0501221	-0.0185662	0.0631402	0.0546331	FALSE	FALSE	FALSE	oTbXl5	0.0158704	0.242056	outcome	TRUE	reported	textfile	458440	0.00932633	7.7e-08	exposure	TRUE	reported	65yvQp	textfile	5959	2	1	TRUE	0.00482352	28.873	23.5941	NA	NA	0.00482513	5959	2.9853e-06	458440	TRUE	1.96685e-07
	rs13255030	G	A	G	A	0.0221479	-0.000318305	0.349521	0.41512	FALSE	FALSE	FALSE	oTbXl5	0.00731233	0.965279	outcome	TRUE	reported	textfile	458440	0.00475292	3.2e-06	exposure	TRUE	reported	65yvQp	textfile	5959	2	1	TRUE	0.00363071	21.7069	23.5941	NA	NA	0.00363192	5959	4.13328e-09	458440	TRUE	3.80523e-06
	rs146721298	G	C	G	C	0.0750267	0.0289666	0.0235492	0.0195936	FALSE	TRUE	FALSE	oTbXl5	0.0260035	0.2653	outcome	TRUE	reported	textfile	458440	0.0148432	4.3e-07	exposure	TRUE	reported	65yvQp	textfile	5959	2	1	TRUE	0.00426919	25.5406	23.5941	NA	NA	0.00427061	5959	2.70676e-06	458440	TRUE	9.98461e-07
	rs189353830	A	G	A	G	0.0511509	0.369647	0.0434051	0.000110156	FALSE	FALSE	FALSE	oTbXl5	0.352849	0.29482	outcome	TRUE	reported	textfile	458440	0.0111033	4.1e-06	exposure	TRUE	reported	65yvQp	textfile	5959	2	1	TRUE	0.00354883	21.2157	23.5941	NA	NA	0.00355002	5959	2.39395e-06	458440	TRUE	8.37196e-06
	rs2465153	G	A	G	A	0.025014	-0.0131249	0.246845	0.225467	FALSE	FALSE	FALSE	oTbXl5	0.00860056	0.126995	outcome	TRUE	reported	textfile	458440	0.00528849	2.2e-06	exposure	TRUE	reported	65yvQp	textfile	5959	2	1	TRUE	0.00374026	22.3644	23.5941	NA	NA	0.00374151	5959	5.07991e-06	458440	TRUE	6.08797e-06
	rs2842124	G	T	G	T	0.0289328	0.00353078	0.187395	0.223429	FALSE	FALSE	FALSE	oTbXl5	0.00864944	0.68312	outcome	TRUE	reported	textfile	458440	0.00574796	4.8e-07	exposure	TRUE	reported	65yvQp	textfile	5959	2	1	TRUE	0.00423387	25.3284	23.5941	NA	NA	0.00423528	5959	3.63483e-07	458440	TRUE	7.38304e-07
	rs2859246	T	C	T	C	-0.0246499	-0.00932978	0.470935	0.410202	FALSE	FALSE	FALSE	oTbXl5	0.00732206	0.202592	outcome	TRUE	reported	textfile	458440	0.00459504	8.1e-08	exposure	TRUE	reported	65yvQp	textfile	5959	2	1	TRUE	0.00480603	28.7678	23.5941	NA	NA	0.00480763	5959	3.54156e-06	458440	TRUE	2.20799e-07
	rs387455	G	A	G	A	0.0230825	-0.00882889	0.319575	0.32947	FALSE	FALSE	FALSE	oTbXl5	0.00764961	0.248433	outcome	TRUE	reported	textfile	458440	0.00483943	1.8e-06	exposure	TRUE	reported	65yvQp	textfile	5959	2	1	TRUE	0.0038032	22.7421	23.5941	NA	NA	0.00380447	5959	2.90571e-06	458440	TRUE	4.1272e-06
	rs56160072	A	G	A	G	-0.0589414	-0.0377525	0.0335267	0.0359567	FALSE	FALSE	FALSE	oTbXl5	0.019366	0.0512448	outcome	TRUE	reported	textfile	458440	0.0126549	3.2e-06	exposure	TRUE	reported	65yvQp	textfile	5959	2	1	TRUE	0.0036272	21.6859	23.5941	NA	NA	0.00362842	5959	8.28948e-06	458440	TRUE	1.06435e-05
	rs56295230	G	A	G	A	0.0332505	0.00753034	0.109992	0.158479	FALSE	FALSE	FALSE	oTbXl5	0.00986591	0.445303	outcome	TRUE	reported	textfile	458440	0.0072611	4.7e-06	exposure	TRUE	reported	65yvQp	textfile	5959	2	1	TRUE	0.00350665	20.9626	23.5941	NA	NA	0.00350782	5959	1.27079e-06	458440	TRUE	8.18379e-06
	rs62495394	G	A	G	A	-0.0548959	-0.0338864	0.0414777	0.0226289	FALSE	FALSE	FALSE	oTbXl5	0.0241957	0.161359	outcome	TRUE	reported	textfile	458440	0.0112642	1.1e-06	exposure	TRUE	reported	65yvQp	textfile	5959	2	1	TRUE	0.00396989	23.7429	23.5941	NA	NA	0.00397122	5959	4.2785e-06	458440	TRUE	2.87006e-06
	rs72679176	G	C	G	C	-0.100507	-0.0193912	0.0114826	0.046054	FALSE	TRUE	FALSE	oTbXl5	0.0171692	0.25872	outcome	TRUE	reported	textfile	458440	0.0211778	2.1e-06	exposure	TRUE	reported	65yvQp	textfile	5959	2	1	TRUE	0.00376547	22.5157	23.5941	NA	NA	0.00376673	5959	2.78245e-06	458440	TRUE	4.56018e-06
	rs8192856	T	A	T	A	-0.0421359	-0.0267651	0.0670973	0.0820456	FALSE	TRUE	FALSE	oTbXl5	0.0131328	0.0415461	outcome	TRUE	reported	textfile	458440	0.00913326	4e-06	exposure	TRUE	reported	65yvQp	textfile	5959	2	1	TRUE	0.00355903	21.2768	23.5941	NA	NA	0.00356022	5959	9.06022e-06	458440	TRUE	1.36223e-05
GCST90032644	rs115192798	A	G	A	G	0.1585	-0.0441153	0.0727999	0.0547956	FALSE	FALSE	FALSE	8hET2I	0.0159167	0.00557751	outcome	TRUE	reported	textfile	458440	0.0340189	3.2e-06	exposure	TRUE	reported	EHYDKk	textfile	5959	2	1	TRUE	0.00362966	21.7006	24.4451	NA	NA	0.00363087	5959	1.67565e-05	458440	TRUE	1.61696e-05
	rs11767407	T	C	T	C	-0.0961253	0.0147563	0.235798	0.179426	FALSE	FALSE	FALSE	8hET2I	0.00938732	0.115964	outcome	TRUE	reported	textfile	458440	0.02057	3e-06	exposure	TRUE	reported	EHYDKk	textfile	5959	2	1	TRUE	0.00365128	21.8304	24.4451	NA	NA	0.0036525	5959	5.39e-06	458440	TRUE	8.12829e-06
	rs12741843	T	A	T	A	0.235514	-0.0144472	0.0353484	0.045609	FALSE	TRUE	FALSE	8hET2I	0.0172999	0.403657	outcome	TRUE	reported	textfile	458440	0.047839	8.5e-07	exposure	TRUE	reported	EHYDKk	textfile	5959	2	1	TRUE	0.00405073	24.2283	24.4451	NA	NA	0.00405208	5959	1.52124e-06	458440	TRUE	1.64234e-06
	rs28374514	T	A	T	A	0.369686	-0.0192096	0.016381	0.0564098	FALSE	TRUE	FALSE	8hET2I	0.0156306	0.219083	outcome	TRUE	reported	textfile	458440	0.0685276	6.9e-08	exposure	TRUE	reported	EHYDKk	textfile	5959	2	1	TRUE	0.00486011	29.093	24.4451	NA	NA	0.00486173	5959	3.2946e-06	458440	TRUE	1.82816e-07
	rs58747962	G	A	G	A	-0.110055	-0.000144689	0.184593	0.248005	FALSE	FALSE	FALSE	8hET2I	0.00833005	0.986142	outcome	TRUE	reported	textfile	458440	0.0226498	1.2e-06	exposure	TRUE	reported	EHYDKk	textfile	5959	2	1	TRUE	0.00394639	23.6018	24.4451	NA	NA	0.00394771	5959	6.58105e-10	458440	TRUE	1.42006e-06
	rs59379559	G	T	G	T	0.145582	-0.0261461	0.103561	0.0782469	FALSE	FALSE	FALSE	8hET2I	0.0133855	0.050782	outcome	TRUE	reported	textfile	458440	0.0283953	2.9e-07	exposure	TRUE	reported	EHYDKk	textfile	5959	2	1	TRUE	0.00439175	26.2771	24.4451	NA	NA	0.00439322	5959	8.32263e-06	458440	TRUE	1.12383e-06
	rs72681118	A	G	A	G	0.130082	0.0045715	0.13071	0.0600438	FALSE	FALSE	FALSE	8hET2I	0.0151558	0.762932	outcome	TRUE	reported	textfile	458440	0.0259082	5.1e-07	exposure	TRUE	reported	EHYDKk	textfile	5959	2	1	TRUE	0.00421263	25.2008	24.4451	NA	NA	0.00421404	5959	1.98463e-07	458440	TRUE	7.40267e-07
	rs7956303	A	G	A	G	-0.215058	-0.00115393	0.0465934	0.055762	FALSE	FALSE	FALSE	8hET2I	0.0157215	0.941489	outcome	TRUE	reported	textfile	458440	0.0419216	2.9e-07	exposure	TRUE	reported	EHYDKk	textfile	5959	2	1	TRUE	0.00439692	26.3081	24.4451	NA	NA	0.00439839	5959	1.17514e-08	458440	TRUE	3.68565e-07
	rs9689992	C	T	C	T	-0.0970715	0.0159035	0.226677	0.169944	FALSE	FALSE	FALSE	8hET2I	0.00960792	0.0978746	outcome	TRUE	reported	textfile	458440	0.0208033	3.1e-06	exposure	TRUE	reported	EHYDKk	textfile	5959	2	1	TRUE	0.00364051	21.7657	24.4451	NA	NA	0.00364172	5959	5.97645e-06	458440	TRUE	8.76974e-06

## Sheet: Supplementary Table S3 
Supplementary Table S3: SNP-specific causal estimates for gut microbiota on osteoarthritis
id	id.exposure	id.outcome	samplesize	SNP	b	se	p	lo_ci	up_ci	or	or_lci95	or_uci95
GCST90032174	8D3oHL	sbIIIp	458440	rs10781012	0.053307	0.556383	0.923672	-1.0372	1.14382	1.05475	0.354445	3.13873
	8D3oHL	sbIIIp	458440	rs10878425	0.00947454	0.730848	0.989657	-1.42299	1.44194	1.00952	0.240993	4.22888
	8D3oHL	sbIIIp	458440	rs118022621	-1.06559	0.495468	0.0315016	-2.03671	-0.0944749	0.344524	0.130457	0.909851
	8D3oHL	sbIIIp	458440	rs12637754	-0.412877	0.571878	0.470315	-1.53376	0.708004	0.661744	0.215724	2.02994
	8D3oHL	sbIIIp	458440	rs13020322	-0.548999	0.563236	0.329697	-1.65294	0.554943	0.577528	0.191486	1.74184
	8D3oHL	sbIIIp	458440	rs164427	-2.46833	0.597264	3.58492e-05	-3.63897	-1.29769	0.0847264	0.0262795	0.273162
	8D3oHL	sbIIIp	458440	rs2827109	-0.24644	0.622582	0.692226	-1.4667	0.973819	0.781578	0.230685	2.64804
	8D3oHL	sbIIIp	458440	All - Inverse variance weighted	-0.707731	0.322232	0.0280676	-1.33931	-0.0761563	0.492761	0.262028	0.926671
	8D3oHL	sbIIIp	458440	All - MR Egger	-1.26931	1.34872	0.389851	-3.9128	1.37417	0.281025	0.0199846	3.95181
GCST90032189	52Kelv	1GVcY7	458440	rs139588694	-0.163039	0.222528	0.463761	-0.599194	0.273116	0.849558	0.549254	1.31405
	52Kelv	1GVcY7	458440	rs1599011	-0.362582	0.183345	0.0479737	-0.721938	-0.00322708	0.695877	0.48581	0.996778
	52Kelv	1GVcY7	458440	rs6697926	-0.329341	0.157363	0.0363604	-0.637772	-0.0209095	0.719398	0.528469	0.979308
	52Kelv	1GVcY7	458440	rs6834989	-0.355752	0.185766	0.0554853	-0.719852	0.00834889	0.700647	0.486824	1.00838
	52Kelv	1GVcY7	458440	rs6866016	0.163455	0.184981	0.376895	-0.199108	0.526018	1.17757	0.819461	1.69218
	52Kelv	1GVcY7	458440	rs7165513	-0.289324	0.177127	0.10238	-0.636493	0.057846	0.74877	0.529145	1.05955
	52Kelv	1GVcY7	458440	rs74838822	-0.144953	0.20297	0.475129	-0.542774	0.252868	0.865063	0.581134	1.28771
	52Kelv	1GVcY7	458440	All - Inverse variance weighted	-0.22304	0.0714664	0.00180291	-0.363114	-0.0829663	0.800083	0.695507	0.920382
	52Kelv	1GVcY7	458440	All - MR Egger	0.00732509	0.206356	0.973057	-0.397133	0.411783	1.00735	0.672245	1.50951
GCST90032254	2R1p0K	ohAhVo	458440	rs10931443	0.209374	0.175011	0.231559	-0.133647	0.552396	1.23291	0.874899	1.73741
	2R1p0K	ohAhVo	458440	rs113106320	0.0497031	0.219412	0.82079	-0.380345	0.479751	1.05096	0.683626	1.61567
	2R1p0K	ohAhVo	458440	rs12074319	-0.152614	0.201335	0.448444	-0.54723	0.242002	0.858461	0.57855	1.2738
	2R1p0K	ohAhVo	458440	rs13025431	0.629685	0.257959	0.0146456	0.124085	1.13528	1.87702	1.13211	3.11206
	2R1p0K	ohAhVo	458440	rs156926	0.284939	0.195546	0.145076	-0.0983313	0.668209	1.32968	0.906349	1.95074
	2R1p0K	ohAhVo	458440	rs2073142	-0.0576849	0.240069	0.810109	-0.528219	0.41285	0.943947	0.589654	1.51112
	2R1p0K	ohAhVo	458440	rs62553714	0.455782	0.2003	0.022876	0.0631945	0.848369	1.57741	1.06523	2.33583
	2R1p0K	ohAhVo	458440	All - Inverse variance weighted	0.194231	0.0978483	0.0471417	0.00244869	0.386014	1.21438	1.00245	1.47111
	2R1p0K	ohAhVo	458440	All - MR Egger	-0.0737892	0.26309	0.79035	-0.589446	0.441867	0.928867	0.554635	1.55561
GCST90032282	J8P9EQ	4JoPVN	458440	rs11149701	-0.0587862	0.0803367	0.464323	-0.216246	0.0986737	0.942908	0.805537	1.10371
	J8P9EQ	4JoPVN	458440	rs113732002	-0.103136	0.0614314	0.0931764	-0.223541	0.0172699	0.902005	0.799682	1.01742
	J8P9EQ	4JoPVN	458440	rs117186187	0.0252873	0.0874499	0.772456	-0.146115	0.196689	1.02561	0.864059	1.21737
	J8P9EQ	4JoPVN	458440	rs12937830	-0.0842383	0.0739727	0.254797	-0.229225	0.0607482	0.919212	0.79515	1.06263
	J8P9EQ	4JoPVN	458440	rs138926794	-0.41395	0.148133	0.00519878	-0.704291	-0.12361	0.661034	0.494459	0.883725
	J8P9EQ	4JoPVN	458440	rs1491836	-0.0717028	0.0858831	0.403781	-0.240034	0.0966281	0.930808	0.786601	1.10145
	J8P9EQ	4JoPVN	458440	rs1579597	-0.0345382	0.0798755	0.66545	-0.191094	0.122018	0.966051	0.826055	1.12977
	J8P9EQ	4JoPVN	458440	rs1715444	-0.0448887	0.0868999	0.605466	-0.215212	0.125435	0.956104	0.80637	1.13364
	J8P9EQ	4JoPVN	458440	rs17797837	-0.0918393	0.0820074	0.26276	-0.252574	0.0688952	0.912252	0.776799	1.07132
	J8P9EQ	4JoPVN	458440	rs34575286	-0.0920337	0.0868049	0.289037	-0.262171	0.078104	0.912074	0.769379	1.08124
	J8P9EQ	4JoPVN	458440	rs6538367	0.00613043	0.0909495	0.946259	-0.17213	0.184391	1.00615	0.841869	1.20249
	J8P9EQ	4JoPVN	458440	rs6566292	0.162473	0.0895103	0.0695042	-0.0129675	0.337913	1.17642	0.987116	1.40202
	J8P9EQ	4JoPVN	458440	rs72862367	0.0421176	0.102493	0.681122	-0.158768	0.243003	1.04302	0.853194	1.27507
	J8P9EQ	4JoPVN	458440	rs77600851	-0.185511	0.15022	0.216857	-0.479942	0.10892	0.83068	0.618819	1.11507
	J8P9EQ	4JoPVN	458440	rs8037071	-0.0499828	0.0831732	0.547874	-0.213002	0.113037	0.951246	0.808154	1.11967
	J8P9EQ	4JoPVN	458440	All - Inverse variance weighted	-0.0519902	0.0238014	0.0289377	-0.098641	-0.00533946	0.949338	0.906068	0.994675
	J8P9EQ	4JoPVN	458440	All - MR Egger	-0.133355	0.0716697	0.0855541	-0.273827	0.00711779	0.875155	0.760463	1.00714
GCST90032287	0REVMb	zBb6YN	458440	rs10871677	0.0900682	0.156279	0.564393	-0.216239	0.396375	1.09425	0.805543	1.48643
	0REVMb	zBb6YN	458440	rs11021720	0.300044	0.183493	0.102011	-0.0596015	0.65969	1.34992	0.94214	1.93419
	0REVMb	zBb6YN	458440	rs115282868	0.31894	0.250491	0.202925	-0.172022	0.809901	1.37567	0.841961	2.24769
	0REVMb	zBb6YN	458440	rs141167708	0.00938407	0.162127	0.953843	-0.308385	0.327153	1.00943	0.734633	1.38701
	0REVMb	zBb6YN	458440	rs1868719	0.0905719	0.125061	0.468931	-0.154548	0.335692	1.0948	0.856802	1.39891
	0REVMb	zBb6YN	458440	rs55998350	0.213465	0.144593	0.139858	-0.069937	0.496868	1.23796	0.932453	1.64357
	0REVMb	zBb6YN	458440	rs62129301	0.362763	0.139512	0.0093164	0.0893185	0.636207	1.43729	1.09343	1.8893
	0REVMb	zBb6YN	458440	rs72681268	0.0109648	0.110594	0.921023	-0.205799	0.227729	1.01103	0.813997	1.25574
	0REVMb	zBb6YN	458440	rs844732	0.141391	0.166003	0.39436	-0.183974	0.466756	1.15187	0.831957	1.59481
	0REVMb	zBb6YN	458440	All - Inverse variance weighted	0.144659	0.0496401	0.00356648	0.0473646	0.241954	1.15565	1.0485	1.27374
	0REVMb	zBb6YN	458440	All - MR Egger	-0.0298659	0.127957	0.822125	-0.280661	0.22093	0.970576	0.755284	1.24724
GCST90032298	jGCvz7	dRa908	458440	rs10031823	0.303118	0.086972	0.000491698	0.132653	0.473583	1.35407	1.14185	1.60574
	jGCvz7	dRa908	458440	rs11027423	0.00925966	0.090557	0.918556	-0.168232	0.186751	1.0093	0.845158	1.20533
	jGCvz7	dRa908	458440	rs1265491	0.0307103	0.0712753	0.666564	-0.108989	0.17041	1.03119	0.89674	1.18579
	jGCvz7	dRa908	458440	rs34892180	0.229732	0.0845114	0.00656083	0.0640892	0.395374	1.25826	1.06619	1.48494
	jGCvz7	dRa908	458440	rs35026345	-0.0545746	0.0858677	0.525059	-0.222875	0.113726	0.946888	0.800215	1.12045
	jGCvz7	dRa908	458440	rs3940549	0.0336434	0.0548337	0.539511	-0.0738306	0.141117	1.03422	0.928829	1.15156
	jGCvz7	dRa908	458440	rs4877754	0.178651	0.0821344	0.0296223	0.0176675	0.339634	1.1956	1.01782	1.40443
	jGCvz7	dRa908	458440	rs59998390	-0.00695231	0.139743	0.960321	-0.280849	0.266944	0.993072	0.755143	1.30597
	jGCvz7	dRa908	458440	All - Inverse variance weighted	0.0868598	0.0422806	0.0399402	0.00398988	0.16973	1.09074	1.004	1.18498
	jGCvz7	dRa908	458440	All - MR Egger	-0.0841177	0.166955	0.632338	-0.411349	0.243114	0.919323	0.662756	1.27521
GCST90032330	LKxIfy	tVR6NI	458440	rs116926743	0.0822879	0.0844984	0.330136	-0.083329	0.247905	1.08577	0.920048	1.28134
	LKxIfy	tVR6NI	458440	rs12375090	-0.0186301	0.0877114	0.831793	-0.190545	0.153284	0.981542	0.826509	1.16566
	LKxIfy	tVR6NI	458440	rs17022786	0.0942751	0.0800666	0.239012	-0.0626554	0.251206	1.09886	0.939267	1.28557
	LKxIfy	tVR6NI	458440	rs17466062	-0.086372	0.0976766	0.376554	-0.277818	0.105074	0.917253	0.757435	1.11079
	LKxIfy	tVR6NI	458440	rs550057	0.232619	0.0830916	0.00511732	0.0697599	0.395479	1.2619	1.07225	1.4851
	LKxIfy	tVR6NI	458440	rs646850	0.14525	0.096167	0.130943	-0.0432374	0.333737	1.15633	0.957684	1.39618
	LKxIfy	tVR6NI	458440	rs9812270	0.12499	0.0978081	0.20128	-0.0667136	0.316694	1.13314	0.935463	1.37258
	LKxIfy	tVR6NI	458440	All - Inverse variance weighted	0.0869259	0.0392259	0.0266893	0.0100431	0.163809	1.09082	1.01009	1.17799
	LKxIfy	tVR6NI	458440	All - MR Egger	-0.0105447	0.0966689	0.917381	-0.200016	0.178926	0.989511	0.818718	1.19593
GCST90032331	O5awhM	f91ufL	458440	rs10248016	-0.0807981	0.353582	0.819247	-0.773818	0.612222	0.92238	0.461249	1.84453
	O5awhM	f91ufL	458440	rs11885958	-0.33058	0.278807	0.235742	-0.877042	0.215881	0.718507	0.416012	1.24095
	O5awhM	f91ufL	458440	rs12120892	-0.487778	0.332356	0.142202	-1.1392	0.163639	0.613989	0.320076	1.17779
	O5awhM	f91ufL	458440	rs140722677	-0.623578	0.583849	0.2855	-1.76792	0.520766	0.536023	0.170687	1.68332
	O5awhM	f91ufL	458440	rs142777179	-0.417401	0.238267	0.079804	-0.884404	0.0496013	0.658757	0.41296	1.05085
	O5awhM	f91ufL	458440	rs143606156	-0.258499	0.242023	0.285485	-0.732864	0.215865	0.772209	0.480531	1.24094
	O5awhM	f91ufL	458440	rs17203668	-0.194511	0.254167	0.4441	-0.692678	0.303656	0.823237	0.500234	1.3548
	O5awhM	f91ufL	458440	rs1873537	0.460185	0.305742	0.132287	-0.139068	1.05944	1.58437	0.870169	2.88475
	O5awhM	f91ufL	458440	rs56944804	-0.257849	0.280889	0.358632	-0.808392	0.292694	0.772712	0.445574	1.34003
	O5awhM	f91ufL	458440	rs61936974	-0.160016	0.357773	0.65469	-0.861252	0.541219	0.85213	0.422632	1.7181
	O5awhM	f91ufL	458440	rs75453249	0.00722012	0.250945	0.977047	-0.484633	0.499073	1.00725	0.615923	1.64719
	O5awhM	f91ufL	458440	rs78189310	0.22815	0.301464	0.449165	-0.362719	0.81902	1.25627	0.695782	2.26827
	O5awhM	f91ufL	458440	rs8007124	-0.434183	0.340618	0.202418	-1.10179	0.233428	0.647793	0.332274	1.26292
	O5awhM	f91ufL	458440	All - Inverse variance weighted	-0.177907	0.0817306	0.0294997	-0.338099	-0.0177146	0.837021	0.713125	0.982441
	O5awhM	f91ufL	458440	All - MR Egger	-0.17074	0.153806	0.290633	-0.472199	0.130719	0.843041	0.623629	1.13965
GCST90032359	zVFmBZ	3r2gA6	458440	rs1011166	-0.114536	0.159752	0.473398	-0.427651	0.198578	0.89178	0.652039	1.21967
	zVFmBZ	3r2gA6	458440	rs11927941	0.0551281	0.116948	0.637361	-0.174089	0.284345	1.05668	0.840222	1.32889
	zVFmBZ	3r2gA6	458440	rs12606213	0.137413	0.162137	0.396711	-0.180376	0.455201	1.1473	0.834956	1.57649
	zVFmBZ	3r2gA6	458440	rs1321323	0.224052	0.12148	0.0651307	-0.0140479	0.462153	1.25114	0.98605	1.58749
	zVFmBZ	3r2gA6	458440	rs17535596	0.0112576	0.124577	0.927996	-0.232913	0.255429	1.01132	0.792222	1.29101
	zVFmBZ	3r2gA6	458440	rs34022830	0.0885546	0.0757958	0.242673	-0.0600051	0.237114	1.09259	0.94176	1.26759
	zVFmBZ	3r2gA6	458440	rs4556017	0.243123	0.105364	0.0210289	0.0366103	0.449636	1.27523	1.03729	1.56774
	zVFmBZ	3r2gA6	458440	rs58494940	0.312557	0.125135	0.0124983	0.0672918	0.557822	1.36692	1.06961	1.74686
	zVFmBZ	3r2gA6	458440	rs67106669	-0.0105493	0.0962048	0.912683	-0.199111	0.178012	0.989506	0.819459	1.19484
	zVFmBZ	3r2gA6	458440	rs76580439	-0.298924	0.168936	0.0768182	-0.630038	0.0321901	0.741616	0.532572	1.03271
	zVFmBZ	3r2gA6	458440	rs77889679	0.143248	0.106061	0.176818	-0.0646315	0.351127	1.15402	0.937413	1.42067
	zVFmBZ	3r2gA6	458440	rs9403911	-0.0166077	0.115987	0.886143	-0.243942	0.210726	0.983529	0.783533	1.23457
	zVFmBZ	3r2gA6	458440	All - Inverse variance weighted	0.0848968	0.0400437	0.033997	0.00641128	0.163382	1.0886	1.00643	1.17749
	zVFmBZ	3r2gA6	458440	All - MR Egger	0.0498673	0.0974787	0.620057	-0.141191	0.240926	1.05113	0.868323	1.27243
GCST90032371	roSARv	e7iuFL	458440	rs10033614	0.226901	0.207813	0.274898	-0.180413	0.634215	1.25471	0.834926	1.88554
	roSARv	e7iuFL	458440	rs10828852	-0.0320757	0.202318	0.87403	-0.428618	0.364467	0.968433	0.651408	1.43975
	roSARv	e7iuFL	458440	rs117026605	-0.102886	0.135539	0.447801	-0.368544	0.162771	0.90223	0.691741	1.17677
	roSARv	e7iuFL	458440	rs12823603	-0.0248442	0.227737	0.91313	-0.471209	0.42152	0.975462	0.624247	1.52428
	roSARv	e7iuFL	458440	rs144924770	0.207747	0.268286	0.438726	-0.318094	0.733587	1.2309	0.727534	2.08254
	roSARv	e7iuFL	458440	rs2974396	0.306152	0.210956	0.146708	-0.107322	0.719625	1.35819	0.898237	2.05366
	roSARv	e7iuFL	458440	rs55792479	0.237949	0.199272	0.232443	-0.152625	0.628523	1.26864	0.858452	1.87484
	roSARv	e7iuFL	458440	rs72809280	0.0697559	0.311588	0.822857	-0.540957	0.680469	1.07225	0.582191	1.9748
	roSARv	e7iuFL	458440	rs757198	0.211087	0.241465	0.382013	-0.262184	0.684358	1.23502	0.76937	1.9825
	roSARv	e7iuFL	458440	rs78172273	0.0726224	0.253303	0.774341	-0.423852	0.569097	1.07532	0.65452	1.76667
	roSARv	e7iuFL	458440	rs9545779	0.343456	0.160058	0.0318873	0.029742	0.657169	1.40981	1.03019	1.92932
	roSARv	e7iuFL	458440	All - Inverse variance weighted	0.124665	0.061439	0.0424494	0.00424467	0.245085	1.13277	1.00425	1.27773
	roSARv	e7iuFL	458440	All - MR Egger	0.0306302	0.146379	0.838911	-0.256272	0.317533	1.0311	0.773931	1.37373
GCST90032396	5BAWQV	tqgYyd	458440	rs10499262	0.0165252	0.432545	0.969525	-0.831264	0.864314	1.01666	0.435499	2.37338
	5BAWQV	tqgYyd	458440	rs141350591	0.519505	0.351938	0.13991	-0.170293	1.2093	1.68119	0.843418	3.35115
	5BAWQV	tqgYyd	458440	rs16861477	0.986034	0.415593	0.0176635	0.171472	1.8006	2.68058	1.18705	6.05326
	5BAWQV	tqgYyd	458440	rs33988153	-0.665283	0.486729	0.171674	-1.61927	0.288705	0.514128	0.198043	1.3347
	5BAWQV	tqgYyd	458440	rs4486157	0.366227	0.417994	0.380947	-0.453041	1.18549	1.44228	0.635692	3.2723
	5BAWQV	tqgYyd	458440	rs7079743	0.7693	0.453722	0.0899745	-0.119995	1.65859	2.15826	0.886925	5.25193
	5BAWQV	tqgYyd	458440	rs7371606	0.0629797	0.387615	0.870928	-0.696746	0.822706	1.06501	0.498204	2.27665
	5BAWQV	tqgYyd	458440	rs7807431	0.995601	0.494989	0.0442877	0.0254215	1.96578	2.70635	1.02575	7.14048
	5BAWQV	tqgYyd	458440	All - Inverse variance weighted	0.391059	0.183517	0.0330957	0.0313667	0.750752	1.47855	1.03186	2.11859
	5BAWQV	tqgYyd	458440	All - MR Egger	0.683958	0.546403	0.25725	-0.386993	1.75491	1.98171	0.679096	5.78292
GCST90032413	WXhJGX	iNTT7k	458440	rs10134381	0.640261	0.237732	0.00707686	0.174306	1.10622	1.89698	1.19042	3.0229
	WXhJGX	iNTT7k	458440	rs117794339	-0.138978	0.175256	0.427776	-0.48248	0.204523	0.870247	0.617251	1.22694
	WXhJGX	iNTT7k	458440	rs145848388	-0.293362	0.552384	0.59536	-1.37603	0.78931	0.745752	0.252578	2.20188
	WXhJGX	iNTT7k	458440	rs147916135	2.60075	7.02616	0.711269	-11.1705	16.372	13.4738	1.40833e-05	1.28908e+07
	WXhJGX	iNTT7k	458440	rs149527935	0.334873	0.149137	0.0247416	0.0425656	0.627181	1.39776	1.04348	1.87233
	WXhJGX	iNTT7k	458440	rs28514714	0.144917	0.240141	0.546197	-0.325759	0.615593	1.15594	0.72198	1.85075
	WXhJGX	iNTT7k	458440	rs35515607	0.503266	0.264954	0.0575061	-0.0160446	1.02258	1.65412	0.984083	2.78035
	WXhJGX	iNTT7k	458440	rs4667565	-0.144995	0.31142	0.641508	-0.755379	0.465389	0.865027	0.469833	1.59263
	WXhJGX	iNTT7k	458440	rs62160533	-0.0901946	0.196378	0.646025	-0.475095	0.294706	0.913753	0.621826	1.34273
	WXhJGX	iNTT7k	458440	rs74681494	0.338064	0.297758	0.256223	-0.245542	0.921669	1.40223	0.782281	2.51348
	WXhJGX	iNTT7k	458440	rs77788684	0.127169	0.232848	0.584967	-0.329213	0.583551	1.13561	0.719489	1.79239
	WXhJGX	iNTT7k	458440	All - Inverse variance weighted	0.1681	0.0838664	0.0450289	0.00372234	0.332478	1.18306	1.00373	1.39442
	WXhJGX	iNTT7k	458440	All - MR Egger	-0.0167517	0.160976	0.919401	-0.332265	0.298761	0.983388	0.717297	1.34819
GCST90032415	zJXM0h	YgzynD	458440	rs11022321	-0.0885158	0.341014	0.795198	-0.756903	0.579871	0.915289	0.469117	1.78581
	zJXM0h	YgzynD	458440	rs116856501	-0.298602	0.322665	0.354745	-0.931026	0.333821	0.741854	0.394149	1.39629
	zJXM0h	YgzynD	458440	rs12169131	-0.860132	0.409063	0.0354929	-1.66189	-0.0583693	0.423106	0.189779	0.943302
	zJXM0h	YgzynD	458440	rs13082491	-0.548722	0.352494	0.119545	-1.23961	0.142165	0.577687	0.289497	1.15277
	zJXM0h	YgzynD	458440	rs13261147	-0.101839	0.357715	0.775879	-0.80296	0.599282	0.903175	0.448001	1.82081
	zJXM0h	YgzynD	458440	rs162646	-0.322897	0.395637	0.414417	-1.09835	0.452551	0.724048	0.333422	1.57232
	zJXM0h	YgzynD	458440	rs1864927	-0.275822	0.341407	0.419151	-0.94498	0.393337	0.758948	0.388687	1.48192
	zJXM0h	YgzynD	458440	rs2553044	-0.790201	0.352281	0.0248905	-1.48067	-0.0997302	0.453754	0.227485	0.905082
	zJXM0h	YgzynD	458440	rs3790088	0.123653	0.326346	0.704762	-0.515985	0.76329	1.13162	0.596912	2.14532
	zJXM0h	YgzynD	458440	rs4930241	0.225116	0.23879	0.345814	-0.242911	0.693144	1.25247	0.784341	1.99999
	zJXM0h	YgzynD	458440	rs74497921	-0.049372	0.349541	0.887674	-0.734473	0.635729	0.951827	0.479758	1.8884
	zJXM0h	YgzynD	458440	rs76264713	0.166226	0.307179	0.588414	-0.435846	0.768297	1.18084	0.646717	2.15609
	zJXM0h	YgzynD	458440	rs79740357	-0.50201	0.356042	0.158548	-1.19985	0.195833	0.605313	0.301238	1.21632
	zJXM0h	YgzynD	458440	All - Inverse variance weighted	-0.190899	0.0973986	0.0499981	-0.381801	1.91869e-06	0.826216	0.682631	1
	zJXM0h	YgzynD	458440	All - MR Egger	-0.305744	0.324024	0.365645	-0.940831	0.329343	0.736575	0.390303	1.39005
GCST90032420	S1Ywne	hbjqry	458440	rs113729517	-0.0504525	0.118545	0.670401	-0.282801	0.181896	0.950799	0.75367	1.19949
	S1Ywne	hbjqry	458440	rs117680904	-0.15712	0.139813	0.261102	-0.431153	0.116913	0.854601	0.64976	1.12402
	S1Ywne	hbjqry	458440	rs118080825	-0.168317	0.108673	0.12142	-0.381316	0.0446817	0.845086	0.682962	1.0457
	S1Ywne	hbjqry	458440	rs12658153	-0.107804	0.109447	0.324631	-0.322319	0.106712	0.897804	0.724467	1.11261
	S1Ywne	hbjqry	458440	rs138223156	0.0362836	0.0889143	0.683219	-0.137988	0.210556	1.03695	0.871109	1.23436
	S1Ywne	hbjqry	458440	rs144195999	-0.220116	0.110215	0.0458089	-0.436138	-0.0040945	0.802426	0.646529	0.995914
	S1Ywne	hbjqry	458440	rs2728542	-0.147041	0.137453	0.284728	-0.416448	0.122366	0.863259	0.659385	1.13017
	S1Ywne	hbjqry	458440	rs57583441	0.0198187	0.159648	0.901204	-0.293091	0.332729	1.02002	0.745954	1.39477
	S1Ywne	hbjqry	458440	rs6585999	0.0395382	0.336402	0.906438	-0.619809	0.698886	1.04033	0.538047	2.01151
	S1Ywne	hbjqry	458440	rs746763	-0.0852758	0.136532	0.532244	-0.352879	0.182327	0.918259	0.702663	1.20001
	S1Ywne	hbjqry	458440	rs79581324	-0.0297802	0.123433	0.80935	-0.271709	0.212149	0.970659	0.762076	1.23633
	S1Ywne	hbjqry	458440	All - Inverse variance weighted	-0.0856014	0.037279	0.0216623	-0.158668	-0.0125346	0.91796	0.853279	0.987544
	S1Ywne	hbjqry	458440	All - MR Egger	-0.0841883	0.0789903	0.314268	-0.239009	0.0706327	0.919258	0.787408	1.07319
GCST90032444	12C0Fr	XyShyu	458440	rs140405800	0.00226883	0.121079	0.98505	-0.235047	0.239584	1.00227	0.790534	1.27072
	12C0Fr	XyShyu	458440	rs187716232	-0.17321	0.0686196	0.011596	-0.307705	-0.0387157	0.840961	0.735132	0.962024
	12C0Fr	XyShyu	458440	rs28519639	0.0126867	0.102707	0.901693	-0.188619	0.213992	1.01277	0.828102	1.23861
	12C0Fr	XyShyu	458440	rs4448900	-0.0768899	0.092192	0.40427	-0.257586	0.103806	0.925992	0.772915	1.10939
	12C0Fr	XyShyu	458440	rs4741606	-0.0729983	0.121208	0.547002	-0.310565	0.164568	0.929602	0.733033	1.17888
	12C0Fr	XyShyu	458440	rs67716376	-0.0513644	0.10132	0.61219	-0.249952	0.147224	0.949932	0.778838	1.15861
	12C0Fr	XyShyu	458440	rs7548374	-0.0594222	0.0986702	0.547021	-0.252816	0.133971	0.942309	0.776611	1.14336
	12C0Fr	XyShyu	458440	rs78673225	0.0180745	0.110206	0.869726	-0.197929	0.234078	1.01824	0.820428	1.26374
	12C0Fr	XyShyu	458440	All - Inverse variance weighted	-0.0700146	0.0344302	0.0419998	-0.137498	-0.00253137	0.93238	0.871536	0.997472
	12C0Fr	XyShyu	458440	All - MR Egger	-0.14568	0.0776616	0.109787	-0.297897	0.00653648	0.864434	0.742378	1.00656
GCST90032453	XxhkCv	XO75LP	458440	rs112870369	-0.121684	0.0741373	0.100728	-0.266993	0.0236252	0.885428	0.765678	1.02391
	XxhkCv	XO75LP	458440	rs114554434	-0.0960763	0.0660401	0.14572	-0.225515	0.0333623	0.908395	0.798105	1.03393
	XxhkCv	XO75LP	458440	rs73530148	-0.0763652	0.0532424	0.151488	-0.18072	0.0279898	0.926478	0.834669	1.02839
	XxhkCv	XO75LP	458440	rs76839937	0.0556153	0.0999477	0.577907	-0.140282	0.251513	1.05719	0.869113	1.28597
	XxhkCv	XO75LP	458440	All - Inverse variance weighted	-0.0758478	0.0340187	0.0257747	-0.142525	-0.00917109	0.926957	0.867166	0.990871
	XxhkCv	XO75LP	458440	All - MR Egger	-0.29308	0.171809	0.230155	-0.629825	0.0436654	0.745963	0.532685	1.04463
GCST90032460	cGhZAf	mY4mQY	458440	rs116988601	-0.442911	0.138869	0.00142562	-0.715095	-0.170728	0.642164	0.489146	0.843051
	cGhZAf	mY4mQY	458440	rs144958708	-0.0505363	0.2484	0.838786	-0.537401	0.436328	0.950719	0.584265	1.54702
	cGhZAf	mY4mQY	458440	rs2241919	-0.315029	0.159321	0.0480045	-0.627298	-0.00276074	0.729767	0.534033	0.997243
	cGhZAf	mY4mQY	458440	rs2859868	-0.295553	0.186478	0.112984	-0.66105	0.069944	0.74412	0.516309	1.07245
	cGhZAf	mY4mQY	458440	rs4684157	-0.103394	0.177326	0.559841	-0.450952	0.244164	0.901771	0.637021	1.27655
	cGhZAf	mY4mQY	458440	rs6778770	-0.202794	0.146908	0.16746	-0.490733	0.0851461	0.816447	0.612177	1.08888
	cGhZAf	mY4mQY	458440	rs74376597	-0.290551	0.233588	0.213551	-0.748383	0.167282	0.747852	0.473131	1.18209
	cGhZAf	mY4mQY	458440	rs7522260	-0.278034	0.192927	0.149547	-0.656171	0.100103	0.757271	0.518834	1.10529
	cGhZAf	mY4mQY	458440	rs76326848	0.305277	0.186413	0.101496	-0.0600917	0.670646	1.357	0.941678	1.9555
	cGhZAf	mY4mQY	458440	All - Inverse variance weighted	-0.212923	0.0724746	0.00330441	-0.354973	-0.0708731	0.808218	0.701192	0.93158
	cGhZAf	mY4mQY	458440	All - MR Egger	-0.212084	0.206529	0.338641	-0.616881	0.192714	0.808897	0.539625	1.21254
GCST90032497	1GwPBK	Yv7le2	458440	rs10032258	0.16247	0.291407	0.577161	-0.408688	0.733628	1.17641	0.664521	2.08262
	1GwPBK	Yv7le2	458440	rs11649290	0.934433	0.275147	0.000683463	0.395146	1.47372	2.54577	1.4846	4.36545
	1GwPBK	Yv7le2	458440	rs58686486	0.610744	0.349291	0.0803734	-0.0738669	1.29535	1.8418	0.928795	3.65229
	1GwPBK	Yv7le2	458440	rs61901730	0.0717975	0.29394	0.80703	-0.504324	0.647919	1.07444	0.603914	1.91156
	1GwPBK	Yv7le2	458440	rs6904492	0.498348	0.258757	0.0541131	-0.00881572	1.00551	1.646	0.991223	2.73331
	1GwPBK	Yv7le2	458440	rs72833081	0.0794154	0.12416	0.522419	-0.163939	0.322769	1.08265	0.848794	1.38095
	1GwPBK	Yv7le2	458440	rs76953952	-0.168631	0.239392	0.481177	-0.63784	0.300578	0.844821	0.528433	1.35064
	1GwPBK	Yv7le2	458440	rs77121201	0.415459	0.265309	0.117362	-0.104547	0.935464	1.51507	0.900733	2.5484
	1GwPBK	Yv7le2	458440	rs9357436	0.138956	0.340966	0.683613	-0.529336	0.807249	1.14907	0.588996	2.24173
	1GwPBK	Yv7le2	458440	All - Inverse variance weighted	0.223537	0.10289	0.029812	0.0218724	0.425202	1.25049	1.02211	1.5299
	1GwPBK	Yv7le2	458440	All - MR Egger	-0.101846	0.166617	0.560345	-0.428415	0.224722	0.903168	0.651541	1.25197
GCST90032544	GnbZ0D	WjweWK	458440	rs112435825	-0.417312	0.283259	0.140683	-0.972498	0.137875	0.658816	0.378137	1.14783
	GnbZ0D	WjweWK	458440	rs117684381	-0.275112	0.492628	0.576532	-1.24066	0.690439	0.759487	0.289193	1.99459
	GnbZ0D	WjweWK	458440	rs4802988	-0.441371	0.247043	0.0740002	-0.925576	0.0428343	0.643154	0.396303	1.04376
	GnbZ0D	WjweWK	458440	All - Inverse variance weighted	-0.411496	0.174159	0.0181393	-0.752848	-0.0701446	0.662658	0.471023	0.932259
	GnbZ0D	WjweWK	458440	All - MR Egger	-0.339951	0.518348	0.630464	-1.35591	0.676012	0.711805	0.257712	1.96602
GCST90032545	dt3zai	wOwYyK	458440	rs114681056	-0.593836	0.41598	0.153419	-1.40916	0.221484	0.552205	0.244349	1.24793
	dt3zai	wOwYyK	458440	rs11671988	0.00205128	0.323826	0.994946	-0.632647	0.63675	1.00205	0.531184	1.89033
	dt3zai	wOwYyK	458440	rs147653720	0.708932	0.397826	0.0747467	-0.0708068	1.48867	2.03182	0.931642	4.4312
	dt3zai	wOwYyK	458440	rs17166688	-0.223673	0.170567	0.189739	-0.557985	0.110638	0.799576	0.572361	1.11699
	dt3zai	wOwYyK	458440	rs2676071	-0.132797	0.284976	0.64122	-0.69135	0.425756	0.875643	0.500899	1.53075
	dt3zai	wOwYyK	458440	rs2716562	-0.718567	0.282737	0.0110389	-1.27273	-0.164402	0.48745	0.280065	0.848401
	dt3zai	wOwYyK	458440	rs309022	-0.120592	0.286055	0.67334	-0.68126	0.440076	0.886395	0.505979	1.55283
	dt3zai	wOwYyK	458440	rs337092	-0.195553	0.308162	0.525703	-0.79955	0.408444	0.82238	0.449531	1.50447
	dt3zai	wOwYyK	458440	rs72991239	-0.0560458	0.226459	0.804531	-0.499906	0.387815	0.945496	0.606588	1.47376
	dt3zai	wOwYyK	458440	rs7763764	-0.309671	0.299353	0.300919	-0.896403	0.277062	0.733689	0.408035	1.31925
	dt3zai	wOwYyK	458440	All - Inverse variance weighted	-0.188668	0.0934156	0.0434185	-0.371762	-0.00557333	0.828062	0.689518	0.994442
	dt3zai	wOwYyK	458440	All - MR Egger	-0.155807	0.225156	0.508522	-0.597113	0.285499	0.855724	0.550398	1.33043
GCST90032590	fkyS2r	M5Ow1C	458440	rs11244001	-0.257885	0.183739	0.160456	-0.618013	0.102243	0.772684	0.539014	1.10765
	fkyS2r	M5Ow1C	458440	rs113064681	-0.107513	0.369233	0.770914	-0.83121	0.616184	0.898065	0.435522	1.85185
	fkyS2r	M5Ow1C	458440	rs117055780	0.221892	0.227927	0.330294	-0.224845	0.668628	1.24844	0.79864	1.95156
	fkyS2r	M5Ow1C	458440	rs118079798	-0.480923	0.321756	0.134997	-1.11156	0.149719	0.618213	0.329044	1.16151
	fkyS2r	M5Ow1C	458440	rs150502657	0.025279	0.330684	0.939065	-0.622861	0.673419	1.0256	0.536408	1.96093
	fkyS2r	M5Ow1C	458440	rs152253	-0.171205	0.22488	0.446468	-0.61197	0.26956	0.842649	0.542281	1.30939
	fkyS2r	M5Ow1C	458440	rs3795915	0.0705859	0.261362	0.787107	-0.441684	0.582855	1.07314	0.642953	1.79115
	fkyS2r	M5Ow1C	458440	rs8106720	-0.799415	0.218249	0.000249418	-1.22718	-0.371647	0.449592	0.293117	0.689598
	fkyS2r	M5Ow1C	458440	rs915896	-0.674435	0.236007	0.00426733	-1.13701	-0.211862	0.509444	0.320777	0.809077
	fkyS2r	M5Ow1C	458440	All - Inverse variance weighted	-0.268343	0.118949	0.0240737	-0.501482	-0.0352029	0.764646	0.605632	0.965409
	fkyS2r	M5Ow1C	458440	All - MR Egger	-0.129766	0.281731	0.659052	-0.681958	0.422426	0.878301	0.505626	1.52566
GCST90032591	w6mnvM	uliNco	458440	rs11153022	-0.477274	0.243613	0.050095	-0.954754	0.000206708	0.620473	0.384907	1.00021
	w6mnvM	uliNco	458440	rs112643363	-0.115855	0.290631	0.690163	-0.685492	0.453781	0.890604	0.503842	1.57425
	w6mnvM	uliNco	458440	rs113883921	-0.070117	0.361111	0.846043	-0.777895	0.637661	0.932285	0.459372	1.89205
	w6mnvM	uliNco	458440	rs117217513	-0.11685	0.668195	0.861179	-1.42651	1.19281	0.889719	0.240145	3.29634
	w6mnvM	uliNco	458440	rs138652347	-0.595178	0.377414	0.114798	-1.33491	0.144554	0.551465	0.263182	1.15552
	w6mnvM	uliNco	458440	rs73145798	-0.440422	0.476932	0.355773	-1.37521	0.494364	0.643764	0.252787	1.63946
	w6mnvM	uliNco	458440	All - Inverse variance weighted	-0.326462	0.141401	0.0209567	-0.603609	-0.0493157	0.721472	0.546835	0.951881
	w6mnvM	uliNco	458440	All - MR Egger	-0.145517	0.397734	0.732994	-0.925076	0.634042	0.864575	0.396501	1.88522
GCST90032609	PpE0gm	LiBLeX	458440	rs117472695	0.240238	0.174083	0.16758	-0.100965	0.581441	1.27155	0.903965	1.78861
	PpE0gm	LiBLeX	458440	rs117518675	0.08089	0.300302	0.787651	-0.507702	0.669482	1.08425	0.601877	1.95323
	PpE0gm	LiBLeX	458440	rs541713	0.386875	0.237154	0.102822	-0.0779473	0.851697	1.47237	0.925013	2.34362
	PpE0gm	LiBLeX	458440	rs6417145	0.341869	0.137609	0.0129789	0.072155	0.611583	1.40758	1.07482	1.84335
	PpE0gm	LiBLeX	458440	All - Inverse variance weighted	0.294367	0.0933823	0.00162001	0.111338	0.477396	1.34228	1.11777	1.61187
	PpE0gm	LiBLeX	458440	All - MR Egger	0.292699	0.195829	0.273614	-0.0911254	0.676523	1.34004	0.912903	1.96703
GCST90032635	BrGXH4	AXUIws	458440	rs117047925	-0.0561802	0.112212	0.616609	-0.276115	0.163755	0.945369	0.758725	1.17793
	BrGXH4	AXUIws	458440	rs140978838	0.0418547	0.309265	0.892346	-0.564304	0.648014	1.04274	0.568756	1.91174
	BrGXH4	AXUIws	458440	rs17459831	-0.298169	0.193228	0.122808	-0.676896	0.0805579	0.742176	0.508192	1.08389
	BrGXH4	AXUIws	458440	rs6434500	0.00253857	0.256906	0.992116	-0.500997	0.506074	1.00254	0.605926	1.65877
	BrGXH4	AXUIws	458440	rs6743333	-0.37045	0.167489	0.0269815	-0.69873	-0.0421713	0.690423	0.497217	0.958706
	BrGXH4	AXUIws	458440	rs6972820	0.0263758	0.219371	0.904298	-0.403592	0.456343	1.02673	0.667917	1.57829
	BrGXH4	AXUIws	458440	rs7311655	-0.394308	0.219527	0.0724668	-0.82458	0.0359641	0.674146	0.438419	1.03662
	BrGXH4	AXUIws	458440	All - Inverse variance weighted	-0.157001	0.0691738	0.023228	-0.292582	-0.0214206	0.854703	0.746334	0.978807
	BrGXH4	AXUIws	458440	All - MR Egger	-0.0206786	0.148473	0.894669	-0.311685	0.270328	0.979534	0.732212	1.31039
GCST90032639	65yvQp	oTbXl5	458440	rs114698862	0.370419	0.316635	0.242056	-0.250185	0.991024	1.44834	0.778657	2.69399
	65yvQp	oTbXl5	458440	rs13255030	-0.0143718	0.330159	0.965279	-0.661484	0.63274	0.985731	0.516085	1.88276
	65yvQp	oTbXl5	458440	rs146721298	0.386084	0.34659	0.265301	-0.293232	1.0654	1.47121	0.745849	2.902
	65yvQp	oTbXl5	458440	rs189353830	7.2266	6.8982	0.29482	-6.29387	20.7471	1375.54	0.0018476	1.02408e+09
	65yvQp	oTbXl5	458440	rs2465153	-0.524702	0.34383	0.126997	-1.19861	0.149204	0.591732	0.301614	1.16091
	65yvQp	oTbXl5	458440	rs2842124	0.122034	0.298949	0.68312	-0.463907	0.707974	1.12979	0.628822	2.02988
	65yvQp	oTbXl5	458440	rs2859246	0.378492	0.297042	0.202592	-0.203711	0.960694	1.46008	0.815698	2.61351
	65yvQp	oTbXl5	458440	rs387455	-0.382493	0.331403	0.248434	-1.03204	0.267057	0.682159	0.356278	1.30612
	65yvQp	oTbXl5	458440	rs56160072	0.640509	0.328564	0.0512451	-0.00347566	1.28449	1.89745	0.99653	3.61284
	65yvQp	oTbXl5	458440	rs56295230	0.226473	0.296715	0.445303	-0.355088	0.808034	1.25417	0.701112	2.24349
	65yvQp	oTbXl5	458440	rs62495394	0.617285	0.440756	0.16136	-0.246597	1.48117	1.85389	0.781455	4.39807
	65yvQp	oTbXl5	458440	rs72679176	0.192934	0.170826	0.258722	-0.141885	0.527753	1.2128	0.867721	1.69512
	65yvQp	oTbXl5	458440	rs8192856	0.635209	0.311677	0.0415465	0.0243216	1.2461	1.88742	1.02462	3.47674
	65yvQp	oTbXl5	458440	All - Inverse variance weighted	0.213877	0.0940054	0.0228966	0.0296264	0.398128	1.23847	1.03007	1.48903
	65yvQp	oTbXl5	458440	All - MR Egger	0.52617	0.189066	0.0178081	0.155601	0.89674	1.69244	1.16836	2.4516
GCST90032644	EHYDKk	8hET2I	458440	rs115192798	-0.27833	0.100421	0.00557754	-0.475155	-0.0815052	0.757047	0.621789	0.921728
	EHYDKk	8hET2I	458440	rs11767407	-0.153511	0.0976571	0.115965	-0.344919	0.0378969	0.857691	0.708278	1.03862
	EHYDKk	8hET2I	458440	rs12741843	-0.0613433	0.0734559	0.40366	-0.205317	0.0826303	0.9405	0.814389	1.08614
	EHYDKk	8hET2I	458440	rs28374514	-0.0519619	0.0422807	0.219082	-0.134832	0.0309083	0.949365	0.873863	1.03139
	EHYDKk	8hET2I	458440	rs58747962	0.0013147	0.0756899	0.986142	-0.147037	0.149667	1.00132	0.863262	1.16145
	EHYDKk	8hET2I	458440	rs59379559	-0.179597	0.0919447	0.0507823	-0.359809	0.000614636	0.835607	0.69781	1.00061
	EHYDKk	8hET2I	458440	rs72681118	0.0351432	0.11651	0.762931	-0.193216	0.263502	1.03577	0.824304	1.30148
	EHYDKk	8hET2I	458440	rs7956303	0.00536567	0.0731035	0.941489	-0.137917	0.148649	1.00538	0.871171	1.16027
	EHYDKk	8hET2I	458440	rs9689992	-0.163833	0.0989778	0.097874	-0.357829	0.0301636	0.848884	0.699192	1.03062
	EHYDKk	8hET2I	458440	All - Inverse variance weighted	-0.0737189	0.0283186	0.00923587	-0.129223	-0.0182144	0.928933	0.878778	0.98195
	EHYDKk	8hET2I	458440	All - MR Egger	-0.0278666	0.0643998	0.678243	-0.15409	0.098357	0.972518	0.857195	1.10336

## Sheet: Supplementary Table S4
Supplementary Table S4: List of curated pyroptosis-related genes used in this study
Gene	pqtl-id	Full name
CASP3	3593_72_CASP3_Caspase_3	Caspase 3
CASP8	18158_45_CASP8_Caspase_8	Caspase 8
ELANE	13671_40_ELANE_Elastase	Elastase, neutrophil expressed
IL18	5661_15_IL18_IL_18	Interleukin 18
IL1B	3037_62_IL1B_IL_1b	Interleukin 1 beta
IL6	4673_13_IL6_IL_6	Interleukin 6
NLRP1	11661_11_NLRP1_NALP1	NLR family pyrin domain containing 1
PLCG1	4563_61_PLCG1_PLCG1	Phospholipase C gamma 1
PRKACA	3466_8_PRKACA_PRKACA	Protein kinase cAMP-activated catalytic subunit alpha
TIRAP	9839_148_TIRAP_Tirap	TIR domain containing adaptor protein
TNF	5936_53_TNF_TNF_a	Tumor necrosis factor

## Sheet: Supplementary Table S5
Supplementary Table S5: Instrumental variables for pyroptosis-related proteins associated with osteoarthritis
id	SNP	effect_allele.exposure	other_allele.exposure	effect_allele.outcome	other_allele.outcome	beta.exposure	beta.outcome	eaf.exposure	eaf.outcome	remove	palindromic	ambiguous	id.outcome	se.outcome	pval.outcome	outcome	mr_keep.outcome	pval_origin.outcome	data_source.outcome	samplesize.outcome	se.exposure	pval.exposure	exposure	mr_keep.exposure	pval_origin.exposure	id.exposure	data_source.exposure	samplesize.exposure	action	SNP_index	mr_keep	R2	f	meanf	units.outcome	units.exposure	rsq.exposure	effective_n.exposure	rsq.outcome	effective_n.outcome	steiger_dir	steiger_pval
3037_62_IL1B_IL_1b	rs111577964	C	T	C	T	0.5799	0.0259329	0.00159	0.00350755	FALSE	FALSE	FALSE	k3NGIM	0.0609953	0.67072	outcome	TRUE	reported	textfile	458440	3.515e-08	0.105176	35336	exposure	TRUE	reported	so7lmD	textfile	2	1	TRUE	0.000859572	30.3982	123.018	NA	NA	0.00085962	35336	3.94302e-07	458440	TRUE	2.0132e-07
	rs114288983	T	C	T	C	0.2826	0.00243734	0.02356	0.0158734	FALSE	FALSE	FALSE	k3NGIM	0.0287369	0.932408	outcome	TRUE	reported	textfile	458440	7.293e-25	0.027446	35338	exposure	TRUE	reported	so7lmD	textfile	2	1	TRUE	0.00299118	106.014	123.018	NA	NA	0.00299135	35338	1.56918e-08	458440	TRUE	4.44034e-23
	rs114785923	A	G	A	G	0.2861	-0.0163807	0.02089	0.0235418	FALSE	FALSE	FALSE	k3NGIM	0.0236078	0.487767	outcome	TRUE	reported	textfile	458440	6.972e-24	0.028391	35334	exposure	TRUE	reported	so7lmD	textfile	2	1	TRUE	0.00286573	101.543	123.018	NA	NA	0.00286589	35334	1.0502e-06	458440	TRUE	1.73967e-21
	rs115026597	A	G	A	G	0.3535	0.0738681	0.0057	0.00978536	FALSE	FALSE	FALSE	k3NGIM	0.0366072	0.0436064	outcome	TRUE	reported	textfile	458440	4.09e-11	0.053554	35336	exposure	TRUE	reported	so7lmD	textfile	2	1	TRUE	0.00123152	43.5683	123.018	NA	NA	0.00123159	35336	8.88171e-06	458440	TRUE	5.91707e-09
	rs142953961	C	G	C	G	-0.1124	0.0161805	0.19343	0.173646	FALSE	TRUE	FALSE	k3NGIM	0.00950431	0.0886727	outcome	TRUE	reported	textfile	458440	2.958e-27	0.010394	35340	exposure	TRUE	reported	so7lmD	textfile	2	1	TRUE	0.00329812	116.934	123.018	NA	NA	0.0032983	35340	6.32207e-06	458440	TRUE	2.31568e-23
	rs144376891	C	T	C	T	0.3455	-0.124707	0.00578	0.000308655	FALSE	FALSE	FALSE	k3NGIM	0.20247	0.537943	outcome	TRUE	reported	textfile	458440	4.959e-10	0.055543	35330	exposure	TRUE	reported	so7lmD	textfile	2	1	TRUE	0.001094	38.6913	123.018	NA	NA	0.00109406	35330	8.27522e-07	458440	TRUE	5.61543e-09
	rs145976248	A	G	A	G	0.1819	-0.0146126	0.01658	0.030294	FALSE	FALSE	FALSE	k3NGIM	0.0209935	0.486393	outcome	TRUE	reported	textfile	458440	1.755e-08	0.032283	35375	exposure	TRUE	reported	so7lmD	textfile	2	1	TRUE	0.000896668	31.7463	123.018	NA	NA	0.000896718	35375	1.05683e-06	458440	TRUE	1.59008e-07
	rs146457388	G	A	G	A	0.1912	-0.00163714	0.03747	0.0244525	FALSE	FALSE	FALSE	k3NGIM	0.0233366	0.944072	outcome	TRUE	reported	textfile	458440	1.37e-18	0.021728	35375	exposure	TRUE	reported	so7lmD	textfile	2	1	TRUE	0.00218419	77.4304	123.018	NA	NA	0.00218431	35375	1.07353e-08	458440	TRUE	2.75054e-17
	rs17441745	T	C	T	C	-0.2685	-0.0647166	0.01733	0.0123626	FALSE	FALSE	FALSE	k3NGIM	0.032655	0.0474985	outcome	TRUE	reported	textfile	458440	4.586e-18	0.030993	35311	exposure	TRUE	reported	so7lmD	textfile	2	1	TRUE	0.00212094	75.0476	123.018	NA	NA	0.00212106	35311	8.56737e-06	458440	TRUE	5.50926e-15
	rs1864480	C	T	C	T	-0.1377	0.0089194	0.25624	0.23856	FALSE	FALSE	FALSE	k3NGIM	0.00845276	0.291331	outcome	TRUE	reported	textfile	458440	4.328e-48	0.009451	35332	exposure	TRUE	reported	so7lmD	textfile	2	1	TRUE	0.00597231	212.27	123.018	NA	NA	0.00597265	35332	2.4288e-06	458440	TRUE	5.64901e-43
	rs188023612	C	T	C	T	-0.2882	0.0365595	0.01131	0.0101911	FALSE	FALSE	FALSE	k3NGIM	0.0358166	0.307377	outcome	TRUE	reported	textfile	458440	2.475e-13	0.03937	35308	exposure	TRUE	reported	so7lmD	textfile	2	1	TRUE	0.00151539	53.5837	123.018	NA	NA	0.00151548	35308	2.27274e-06	458440	TRUE	1.21103e-11
	rs189163743	G	C	G	C	-0.2462	0.0415667	0.01138	0.0096054	FALSE	TRUE	FALSE	k3NGIM	0.0370169	0.261474	outcome	TRUE	reported	textfile	458440	3.077e-10	0.039111	35375	exposure	TRUE	reported	so7lmD	textfile	2	1	TRUE	0.00111891	39.6236	123.018	NA	NA	0.00111897	35375	2.75048e-06	458440	TRUE	8.23834e-09
	rs2198531	G	A	G	A	-0.0734	0.0220188	0.10376	0.122247	FALSE	FALSE	FALSE	k3NGIM	0.0109862	0.0450454	outcome	TRUE	reported	textfile	458440	3.72e-08	0.013337	35375	exposure	TRUE	reported	so7lmD	textfile	2	1	TRUE	0.000855476	30.2867	123.018	NA	NA	0.000855524	35375	8.76209e-06	458440	TRUE	1.88409e-06
	rs3105782	G	A	G	A	-0.0592	-0.0176684	0.24857	0.25363	FALSE	FALSE	FALSE	k3NGIM	0.00828017	0.0328572	outcome	TRUE	reported	textfile	458440	3.978e-10	0.009465	35368	exposure	TRUE	reported	so7lmD	textfile	2	1	TRUE	0.00110487	39.1181	123.018	NA	NA	0.00110493	35368	9.93187e-06	458440	TRUE	4.91788e-08
	rs34492166	C	T	C	T	0.1345	-0.00587599	0.21451	0.250328	FALSE	FALSE	FALSE	k3NGIM	0.00830605	0.479296	outcome	TRUE	reported	textfile	458440	3.351e-41	0.010005	35336	exposure	TRUE	reported	so7lmD	textfile	2	1	TRUE	0.00508836	180.712	123.018	NA	NA	0.00508864	35336	1.09167e-06	458440	TRUE	3.00257e-37
	rs34862026	G	A	G	A	-0.0942	-0.00701634	0.07768	0.0979049	FALSE	FALSE	FALSE	k3NGIM	0.012097	0.561909	outcome	TRUE	reported	textfile	458440	4.755e-10	0.015128	35333	exposure	TRUE	reported	so7lmD	textfile	2	1	TRUE	0.00109618	38.7716	123.018	NA	NA	0.00109624	35333	7.33812e-07	458440	TRUE	5.10757e-09
	rs56836833	T	A	T	A	-0.2016	-0.0176933	0.01391	0.0156149	FALSE	TRUE	FALSE	k3NGIM	0.0289816	0.541529	outcome	TRUE	reported	textfile	458440	1.256e-08	0.035418	35303	exposure	TRUE	reported	so7lmD	textfile	2	1	TRUE	0.000916902	32.3973	123.018	NA	NA	0.000916954	35303	8.13003e-07	458440	TRUE	1.03417e-07
	rs62107903	T	C	T	C	-0.144	-0.0228245	0.02494	0.0259816	FALSE	FALSE	FALSE	k3NGIM	0.0226233	0.313026	outcome	TRUE	reported	textfile	458440	4.223e-08	0.026271	35372	exposure	TRUE	reported	so7lmD	textfile	2	1	TRUE	0.000848679	30.0433	123.018	NA	NA	0.000848727	35372	2.22029e-06	458440	TRUE	5.42745e-07
	rs62121131	T	C	T	C	0.0536	-0.000975629	0.33149	0.310309	FALSE	FALSE	FALSE	k3NGIM	0.00778636	0.900286	outcome	TRUE	reported	textfile	458440	6.754e-10	0.008685	35320	exposure	TRUE	reported	so7lmD	textfile	2	1	TRUE	0.00107721	38.086	123.018	NA	NA	0.00107727	35320	3.42468e-08	458440	TRUE	3.37806e-09
	rs6542680	T	C	T	C	-0.3681	-0.0110648	0.18362	0.819453	FALSE	FALSE	FALSE	k3NGIM	0.00934595	0.236447	outcome	TRUE	reported	textfile	458440	1e-200	0.010425	35332	exposure	TRUE	reported	so7lmD	textfile	2	1	TRUE	0.034084	1246.68	123.018	NA	NA	0.0340859	35332	3.05744e-06	458440	TRUE	3.61643e-246
	rs72767193	T	C	T	C	0.1445	-0.00837953	0.03	0.0315963	FALSE	FALSE	FALSE	k3NGIM	0.0205627	0.683633	outcome	TRUE	reported	textfile	458440	1.186e-09	0.023758	35333	exposure	TRUE	reported	so7lmD	textfile	2	1	TRUE	0.00104588	36.9906	123.018	NA	NA	0.00104594	35333	3.62242e-07	458440	TRUE	8.90234e-09
	rs75564661	A	G	A	G	-0.1565	-0.00523941	0.0421	0.0337045	FALSE	FALSE	FALSE	k3NGIM	0.0200025	0.793369	outcome	TRUE	reported	textfile	458440	1.79e-14	0.020418	35318	exposure	TRUE	reported	so7lmD	textfile	2	1	TRUE	0.00166067	58.7459	123.018	NA	NA	0.00166077	35318	1.49663e-07	458440	TRUE	2.60447e-13
	rs77246730	T	C	T	C	-0.6644	0.00690463	0.01381	0.00991078	FALSE	FALSE	FALSE	k3NGIM	0.036482	0.849888	outcome	TRUE	reported	textfile	458440	6.518e-81	0.034876	35334	exposure	TRUE	reported	so7lmD	textfile	2	1	TRUE	0.0101666	362.895	123.018	NA	NA	0.0101672	35334	7.81345e-08	458440	TRUE	1.33379e-74
	rs80177267	C	A	C	A	-0.1504	-0.0154271	0.04037	0.0418223	FALSE	FALSE	FALSE	k3NGIM	0.0179782	0.390837	outcome	TRUE	reported	textfile	458440	2.512e-13	0.020551	35330	exposure	TRUE	reported	so7lmD	textfile	2	1	TRUE	0.00151366	53.5556	123.018	NA	NA	0.00151375	35330	1.60618e-06	458440	TRUE	9.08424e-12
	rs80220851	T	A	T	A	0.2167	0.025501	0.02345	0.0226715	FALSE	TRUE	FALSE	k3NGIM	0.024226	0.29251	outcome	TRUE	reported	textfile	458440	2.084e-15	0.027305	35336	exposure	TRUE	reported	so7lmD	textfile	2	1	TRUE	0.00177927	62.9809	123.018	NA	NA	0.00177937	35336	2.41696e-06	458440	TRUE	1.79693e-13
	rs9309719	G	A	G	A	-0.3012	0.0115585	0.01198	0.987449	FALSE	FALSE	FALSE	k3NGIM	0.0322734	0.720236	outcome	TRUE	reported	textfile	458440	7.851e-15	0.038765	35333	exposure	TRUE	reported	so7lmD	textfile	2	1	TRUE	0.00170572	60.3679	123.018	NA	NA	0.00170582	35333	2.7979e-07	458440	TRUE	1.48244e-13
3593_72_CASP3_Caspase_3	rs10098139	C	T	T	A	-0.0583	-0.00960922	0.1966	0.309789	TRUE	FALSE	FALSE	aix3JW	0.00778876	0.217304	outcome	TRUE	reported	textfile	458440	1.438e-08	0.010284	35362	exposure	TRUE	reported	b5N8sF	textfile	2	1	FALSE	0.000907991	32.1357	63.7019	NA	NA	0.000908043	35362	3.32015e-06	458440	TRUE	2.8787e-07
	rs10428373	T	A	G	A	-0.1711	0.000978631	0.15994	0.149408	TRUE	TRUE	FALSE	aix3JW	0.0101036	0.922838	outcome	TRUE	reported	textfile	458440	1.462e-53	0.011105	35391	exposure	TRUE	reported	b5N8sF	textfile	2	1	FALSE	0.00666295	237.377	63.7019	NA	NA	0.00666333	35391	2.04647e-08	458440	TRUE	1.41201e-49
	rs11933776	T	C	T	C	0.0557	0.0016027	0.45364	0.594377	FALSE	FALSE	FALSE	aix3JW	0.00733852	0.827121	outcome	TRUE	reported	textfile	458440	1.128e-11	0.008204	35391	exposure	TRUE	reported	b5N8sF	textfile	2	1	TRUE	0.00130077	46.093	63.7019	NA	NA	0.00130084	35391	1.04042e-07	458440	TRUE	9.07504e-11
	rs12641300	G	A	G	A	-0.0789	-0.00444158	0.46634	0.451239	FALSE	FALSE	FALSE	aix3JW	0.00724096	0.539614	outcome	TRUE	reported	textfile	458440	3.918e-22	0.008157	35390	exposure	TRUE	reported	b5N8sF	textfile	2	1	TRUE	0.00263673	93.5553	63.7019	NA	NA	0.00263688	35390	8.20733e-07	458440	TRUE	5.62891e-20
	rs148800248	A	G	A	G	-0.192	0.0138818	0.02685	0.0305176	FALSE	FALSE	FALSE	aix3JW	0.0209281	0.507132	outcome	TRUE	reported	textfile	458440	4.281e-14	0.025423	35381	exposure	TRUE	reported	b5N8sF	textfile	2	1	TRUE	0.00160946	57.0327	63.7019	NA	NA	0.00160955	35381	9.59734e-07	458440	TRUE	1.27436e-12
	rs191215861	G	A	G	A	0.2009	0.0241555	0.0208	0.0207683	FALSE	FALSE	FALSE	aix3JW	0.025244	0.338627	outcome	TRUE	reported	textfile	458440	3.677e-12	0.02891	35391	exposure	TRUE	reported	b5N8sF	textfile	2	1	TRUE	0.00136263	48.288	63.7019	NA	NA	0.00136271	35391	1.99726e-06	458440	TRUE	1.21246e-10
	rs35340377	A	G	A	G	-0.0591	9.7591e-05	0.25094	0.277638	FALSE	FALSE	FALSE	aix3JW	0.008047	0.990324	outcome	TRUE	reported	textfile	458440	4.025e-10	0.009451	35156	exposure	TRUE	reported	b5N8sF	textfile	2	1	TRUE	0.00111106	39.1016	63.7019	NA	NA	0.00111112	35156	3.20827e-10	458440	TRUE	1.72192e-09
	rs4440267	A	G	A	G	0.1457	-0.0066549	0.04226	0.0535141	FALSE	FALSE	FALSE	aix3JW	0.0159876	0.677225	outcome	TRUE	reported	textfile	458440	4.778e-13	0.020148	35391	exposure	TRUE	reported	b5N8sF	textfile	2	1	TRUE	0.00147544	52.2914	63.7019	NA	NA	0.00147552	35391	3.77951e-07	458440	TRUE	7.16523e-12
	rs4541868	A	C	A	C	-0.0689	0.00264833	0.21915	0.274275	FALSE	FALSE	FALSE	aix3JW	0.00807514	0.742942	outcome	TRUE	reported	textfile	458440	2.6e-12	0.009846	35364	exposure	TRUE	reported	b5N8sF	textfile	2	1	TRUE	0.00138279	48.966	63.7019	NA	NA	0.00138287	35364	2.34619e-07	458440	TRUE	2.86899e-11
	rs4980320	C	T	C	T	0.0462	0.000523837	0.46986	0.470271	FALSE	FALSE	FALSE	aix3JW	0.00721346	0.942109	outcome	TRUE	reported	textfile	458440	1.455e-08	0.008153	35352	exposure	TRUE	reported	b5N8sF	textfile	2	1	TRUE	0.000907488	32.1088	63.7019	NA	NA	0.000907539	35352	1.15034e-08	458440	TRUE	5.33716e-08
	rs72691790	C	T	C	T	-0.152	-0.0364685	0.02352	0.0190025	FALSE	FALSE	FALSE	aix3JW	0.0264244	0.167554	outcome	TRUE	reported	textfile	458440	2.476e-08	0.027265	35387	exposure	TRUE	reported	b5N8sF	textfile	2	1	TRUE	0.000877508	31.0779	63.7019	NA	NA	0.000877558	35387	4.15473e-06	458440	TRUE	5.69807e-07
	rs72695685	C	T	C	T	-0.1467	0.00102658	0.0658	0.0704844	FALSE	FALSE	FALSE	aix3JW	0.0140147	0.941607	outcome	TRUE	reported	textfile	458440	1.305e-18	0.01666	35389	exposure	TRUE	reported	b5N8sF	textfile	2	1	TRUE	0.00218621	77.5328	63.7019	NA	NA	0.00218633	35389	1.17041e-08	458440	TRUE	2.64311e-17
	rs77265585	C	G	C	G	0.0661	0.00534805	0.14219	0.131902	FALSE	TRUE	FALSE	aix3JW	0.0106466	0.615438	outcome	TRUE	reported	textfile	458440	1.152e-08	0.011583	35374	exposure	TRUE	reported	b5N8sF	textfile	2	1	TRUE	0.000919765	32.5639	63.7019	NA	NA	0.000919817	35374	5.50412e-07	458440	TRUE	8.18056e-08
4563_61_PLCG1_PLCG1	rs10922098	T	C	T	C	-0.1609	0.0240836	0.40011	0.613651	FALSE	FALSE	FALSE	c9ohiA	0.00740359	0.00114206	outcome	TRUE	reported	textfile	458440	1.178e-87	0.008107	35338	exposure	TRUE	reported	i2qTKv	textfile	2	1	TRUE	0.0110239	393.883	68.4611	NA	NA	0.0110245	35338	2.30817e-05	458440	TRUE	3.72119e-74
	rs111579393	C	A	C	A	-0.0595	-0.000837702	0.23965	0.183341	FALSE	FALSE	FALSE	c9ohiA	0.00928273	0.928094	outcome	TRUE	reported	textfile	458440	1.887e-10	0.00934	35338	exposure	TRUE	reported	i2qTKv	textfile	2	1	TRUE	0.0011471	40.5803	68.4611	NA	NA	0.00114716	35338	1.77643e-08	458440	TRUE	9.78502e-10
	rs11569415	A	G	A	G	-0.0649	-0.00292235	0.24276	0.223676	FALSE	FALSE	FALSE	c9ohiA	0.00864428	0.735313	outcome	TRUE	reported	textfile	458440	2.27e-12	0.009249	35372	exposure	TRUE	reported	i2qTKv	textfile	2	1	TRUE	0.00139007	49.2352	68.4611	NA	NA	0.00139015	35372	2.49302e-07	458440	TRUE	2.5778e-11
	rs11751024	A	C	A	C	0.0614	-0.0141171	0.39789	0.398036	FALSE	FALSE	FALSE	c9ohiA	0.00735743	0.0550149	outcome	TRUE	reported	textfile	458440	3.544e-14	0.008104	35439	exposure	TRUE	reported	i2qTKv	textfile	2	1	TRUE	0.00161716	57.4002	68.4611	NA	NA	0.00161725	35439	8.03072e-06	458440	TRUE	1.17219e-11
	rs12478841	G	A	G	A	0.0588	0.0020704	0.21569	0.251072	FALSE	FALSE	FALSE	c9ohiA	0.00825594	0.801987	outcome	TRUE	reported	textfile	458440	8.75e-10	0.009591	35373	exposure	TRUE	reported	i2qTKv	textfile	2	1	TRUE	0.00106144	37.5839	68.4611	NA	NA	0.0010615	35373	1.37181e-07	458440	TRUE	5.25595e-09
	rs12567186	T	C	T	C	0.0764	0.0135316	0.11338	0.111085	FALSE	FALSE	FALSE	c9ohiA	0.0114561	0.237533	outcome	TRUE	reported	textfile	458440	1.214e-09	0.012569	35343	exposure	TRUE	reported	i2qTKv	textfile	2	1	TRUE	0.00104431	36.9454	68.4611	NA	NA	0.00104437	35343	3.04329e-06	458440	TRUE	3.02831e-08
	rs12726412	C	T	C	T	0.1115	-0.00234272	0.06009	0.0448597	FALSE	FALSE	FALSE	c9ohiA	0.0173837	0.892798	outcome	TRUE	reported	textfile	458440	1.91e-11	0.01661	35338	exposure	TRUE	reported	i2qTKv	textfile	2	1	TRUE	0.00127355	45.0595	68.4611	NA	NA	0.00127362	35338	3.96165e-08	458440	TRUE	1.27051e-10
	rs1337169	C	T	C	T	-0.0664	0.0241146	0.32703	0.683191	FALSE	FALSE	FALSE	c9ohiA	0.00776087	0.00188869	outcome	TRUE	reported	textfile	458440	6.405e-15	0.008518	35336	exposure	TRUE	reported	i2qTKv	textfile	2	1	TRUE	0.00171671	60.7626	68.4611	NA	NA	0.00171681	35336	2.10596e-05	458440	TRUE	2.42659e-11
	rs1706435	G	A	G	A	0.0668	-0.00307846	0.36981	0.439746	FALSE	FALSE	FALSE	c9ohiA	0.00725531	0.671344	outcome	TRUE	reported	textfile	458440	4.849e-16	0.008231	35339	exposure	TRUE	reported	i2qTKv	textfile	2	1	TRUE	0.00186031	65.8602	68.4611	NA	NA	0.00186041	35339	3.92712e-07	458440	TRUE	1.32043e-14
	rs17514403	A	G	A	G	-0.1481	-0.00352429	0.02655	0.0233335	FALSE	FALSE	FALSE	c9ohiA	0.0236948	0.881761	outcome	TRUE	reported	textfile	458440	2.283e-09	0.024781	35338	exposure	TRUE	reported	i2qTKv	textfile	2	1	TRUE	0.0010097	35.7148	68.4611	NA	NA	0.00100976	35338	4.82566e-08	458440	TRUE	1.07972e-08
	rs184080912	A	C	A	C	0.1238	-0.0420095	0.045	0.0373916	FALSE	FALSE	FALSE	c9ohiA	0.0187708	0.0252191	outcome	TRUE	reported	textfile	458440	1.843e-10	0.019423	35338	exposure	TRUE	reported	i2qTKv	textfile	2	1	TRUE	0.00114833	40.6241	68.4611	NA	NA	0.0011484	35338	1.09256e-05	458440	TRUE	2.99656e-08
	rs188302747	G	C	G	C	0.1669	0.00135928	0.0349	0.0130235	FALSE	TRUE	FALSE	c9ohiA	0.0318008	0.965906	outcome	TRUE	reported	textfile	458440	1.408e-14	0.021688	35439	exposure	TRUE	reported	i2qTKv	textfile	2	1	TRUE	0.00166827	59.2174	68.4611	NA	NA	0.00166837	35439	3.9853e-09	458440	TRUE	1.35506e-13
	rs2213570	C	A	C	A	0.0533	0.0119221	0.33028	0.754452	FALSE	FALSE	FALSE	c9ohiA	0.00837268	0.154467	outcome	TRUE	reported	textfile	458440	2.541e-10	0.008428	35438	exposure	TRUE	reported	i2qTKv	textfile	2	1	TRUE	0.00112732	39.9927	68.4611	NA	NA	0.00112738	35438	4.42277e-06	458440	TRUE	1.12703e-08
	rs550671	T	C	T	C	0.1231	-0.0289601	0.14045	0.132183	FALSE	FALSE	FALSE	c9ohiA	0.0106734	0.00666178	outcome	TRUE	reported	textfile	458440	4.533e-27	0.011425	35440	exposure	TRUE	reported	i2qTKv	textfile	2	1	TRUE	0.00326505	116.086	68.4611	NA	NA	0.00326523	35440	1.60586e-05	458440	TRUE	4.99976e-22
	rs61820876	T	G	T	G	-0.0785	0.00511271	0.27768	0.305042	FALSE	FALSE	FALSE	c9ohiA	0.00781531	0.512988	outcome	TRUE	reported	textfile	458440	1.115e-18	0.008897	35337	exposure	TRUE	reported	i2qTKv	textfile	2	1	TRUE	0.0021982	77.8444	68.4611	NA	NA	0.00219832	35337	9.33531e-07	458440	TRUE	8.5469e-17
	rs6477	G	C	G	C	0.08	0.0142201	0.23653	0.0872851	FALSE	TRUE	FALSE	c9ohiA	0.0129963	0.273881	outcome	TRUE	reported	textfile	458440	1.411e-15	0.010019	35439	exposure	TRUE	reported	i2qTKv	textfile	2	1	TRUE	0.00179585	63.7539	68.4611	NA	NA	0.00179595	35439	2.61146e-06	458440	TRUE	1.38735e-13
	rs704	A	G	A	G	0.0549	0.00786365	0.49189	0.475392	FALSE	FALSE	FALSE	c9ohiA	0.00720319	0.27497	outcome	TRUE	reported	textfile	458440	6.021e-12	0.007981	35360	exposure	TRUE	reported	i2qTKv	textfile	2	1	TRUE	0.0013364	47.3157	68.4611	NA	NA	0.00133648	35360	2.59966e-06	458440	TRUE	2.38423e-10
	rs74974231	A	G	A	G	0.0575	-0.015173	0.22045	0.181552	FALSE	FALSE	FALSE	c9ohiA	0.00934464	0.104439	outcome	TRUE	reported	textfile	458440	2.905e-09	0.009685	35370	exposure	TRUE	reported	i2qTKv	textfile	2	1	TRUE	0.000995563	35.2462	68.4611	NA	NA	0.000995619	35370	5.75088e-06	458440	TRUE	1.25783e-07
	rs753381	C	T	C	T	0.0669	-0.0237533	0.47315	0.550995	FALSE	FALSE	FALSE	c9ohiA	0.00723082	0.00101984	outcome	TRUE	reported	textfile	458440	5.799e-17	0.007994	35372	exposure	TRUE	reported	i2qTKv	textfile	2	1	TRUE	0.00197608	70.0325	68.4611	NA	NA	0.00197619	35372	2.35387e-05	458440	TRUE	6.89159e-13
	rs9267139	A	G	A	G	0.07	-0.0051935	0.10872	0.0823914	FALSE	FALSE	FALSE	c9ohiA	0.0131053	0.691892	outcome	TRUE	reported	textfile	458440	3.658e-08	0.012712	35439	exposure	TRUE	reported	i2qTKv	textfile	2	1	TRUE	0.0008549	30.321	68.4611	NA	NA	0.000854948	35439	3.42567e-07	458440	TRUE	2.01016e-07
	rs9270675	T	A	C	A	0.0806	0.00969494	0.09125	0.673949	TRUE	TRUE	FALSE	c9ohiA	0.00767781	0.206689	outcome	TRUE	reported	textfile	458440	4.903e-09	0.013777	35439	exposure	TRUE	reported	i2qTKv	textfile	2	1	FALSE	0.000964851	34.2244	68.4611	NA	NA	0.000964905	35439	3.47803e-06	458440	TRUE	1.17517e-07
9839_148_TIRAP_Tirap	rs10893512	C	T	T	A	-0.1097	-0.787114	0.06005	3.59916e-05	TRUE	FALSE	FALSE	TaKp4e	0.599077	0.188887	outcome	TRUE	reported	textfile	458440	1.716e-10	0.017181	35369	exposure	TRUE	reported	GfHIhy	textfile	2	1	FALSE	0.00115131	40.7654	77.5892	NA	NA	0.00115138	35369	3.76554e-06	458440	TRUE	6.66389e-09
	rs113674517	T	G	T	G	-0.2057	0.00675252	0.01713	0.0237294	FALSE	FALSE	FALSE	TaKp4e	0.023587	0.774663	outcome	TRUE	reported	textfile	458440	2.333e-10	0.032457	35371	exposure	TRUE	reported	GfHIhy	textfile	2	1	TRUE	0.00113426	40.1631	77.5892	NA	NA	0.00113432	35371	1.78775e-07	458440	TRUE	1.65405e-09
	rs12574844	A	G	A	G	0.1059	-0.0127414	0.08104	0.070284	FALSE	FALSE	FALSE	TaKp4e	0.0141056	0.366374	outcome	TRUE	reported	textfile	458440	1.74e-12	0.015013	35374	exposure	TRUE	reported	GfHIhy	textfile	2	1	TRUE	0.00140463	49.7545	77.5892	NA	NA	0.00140471	35374	1.77979e-06	458440	TRUE	5.63467e-11
	rs139954282	A	G	A	G	-0.1432	-0.00106001	0.02626	0.0189818	FALSE	FALSE	FALSE	TaKp4e	0.0263394	0.967898	outcome	TRUE	reported	textfile	458440	1.593e-08	0.02534	35369	exposure	TRUE	reported	GfHIhy	textfile	2	1	TRUE	0.000902107	31.9336	77.5892	NA	NA	0.000902158	35369	3.53287e-09	458440	TRUE	5.5305e-08
	rs16873418	G	A	G	A	-0.0574	0.000386575	0.2507	0.292604	FALSE	FALSE	FALSE	TaKp4e	0.00792282	0.961085	outcome	TRUE	reported	textfile	458440	1.132e-09	0.009426	35362	exposure	TRUE	reported	GfHIhy	textfile	2	1	TRUE	0.00104756	37.0804	77.5892	NA	NA	0.00104761	35362	5.19311e-09	458440	TRUE	4.81913e-09
	rs342200	A	G	A	G	-0.067	0.00245576	0.42559	0.92884	FALSE	FALSE	FALSE	TaKp4e	0.0140311	0.861061	outcome	TRUE	reported	textfile	458440	3.513e-16	0.008217	35357	exposure	TRUE	reported	GfHIhy	textfile	2	1	TRUE	0.00187686	66.4811	77.5892	NA	NA	0.00187697	35357	6.68202e-08	458440	TRUE	5.85149e-15
	rs342293	G	C	G	C	-0.0651	0.000571216	0.45412	0.458768	FALSE	TRUE	TRUE	TaKp4e	0.00722151	0.936954	outcome	TRUE	reported	textfile	458440	1.496e-15	0.008161	35357	exposure	TRUE	reported	GfHIhy	textfile	2	1	FALSE	0.00179647	63.6283	77.5892	NA	NA	0.00179657	35357	1.36478e-08	458440	TRUE	1.8232e-14
	rs4937122	G	T	G	T	-0.0956	-0.00328074	0.06363	0.0739224	FALSE	FALSE	FALSE	TaKp4e	0.0137522	0.811446	outcome	TRUE	reported	textfile	458440	7.396e-09	0.016535	35375	exposure	TRUE	reported	GfHIhy	textfile	2	1	TRUE	0.000944062	33.4259	77.5892	NA	NA	0.000944116	35375	1.24142e-07	458440	TRUE	3.67182e-08
	rs55877696	T	C	T	C	-0.0779	-0.0133234	0.12524	0.13592	FALSE	FALSE	FALSE	TaKp4e	0.0105179	0.20525	outcome	TRUE	reported	textfile	458440	3.463e-10	0.012411	35371	exposure	TRUE	reported	GfHIhy	textfile	2	1	TRUE	0.00111258	39.3946	77.5892	NA	NA	0.00111264	35371	3.50018e-06	458440	TRUE	1.14636e-08
	rs631023	A	C	A	C	-0.0889	0.00346869	0.26884	0.730813	FALSE	FALSE	FALSE	TaKp4e	0.00812075	0.669279	outcome	TRUE	reported	textfile	458440	4.161e-22	0.009196	35377	exposure	TRUE	reported	GfHIhy	textfile	2	1	TRUE	0.00263475	93.4504	77.5892	NA	NA	0.0026349	35377	3.97977e-07	458440	TRUE	3.71496e-20
	rs7106816	T	C	T	C	0.073	0.0153143	0.21987	0.181311	FALSE	FALSE	FALSE	TaKp4e	0.00936708	0.102068	outcome	TRUE	reported	textfile	458440	2.061e-13	0.009939	35367	exposure	TRUE	reported	GfHIhy	textfile	2	1	TRUE	0.001523	53.9431	77.5892	NA	NA	0.00152309	35367	5.83046e-06	458440	TRUE	3.19051e-11
	rs73017399	C	G	C	G	-0.0976	-0.00353405	0.30554	0.2419	FALSE	TRUE	FALSE	TaKp4e	0.00840993	0.674321	outcome	TRUE	reported	textfile	458440	1.638e-28	0.008812	35376	exposure	TRUE	reported	GfHIhy	textfile	2	1	TRUE	0.00345572	122.667	77.5892	NA	NA	0.00345591	35376	3.85194e-07	458440	TRUE	4.92212e-26
	rs76635121	A	C	C	G	-0.5242	-0.00332716	0.00208	0.0181321	TRUE	FALSE	FALSE	TaKp4e	0.0268452	0.901364	outcome	TRUE	reported	textfile	458440	3.409e-10	0.083485	35363	exposure	TRUE	reported	GfHIhy	textfile	2	1	FALSE	0.00111364	39.4233	77.5892	NA	NA	0.0011137	35363	3.35068e-08	458440	TRUE	1.79212e-09
	rs77685025	A	G	A	G	0.1155	-0.00410942	0.08112	0.0923894	FALSE	FALSE	FALSE	TaKp4e	0.0124439	0.741221	outcome	TRUE	reported	textfile	458440	1.451e-14	0.015016	35375	exposure	TRUE	reported	GfHIhy	textfile	2	1	TRUE	0.00166968	59.1604	77.5892	NA	NA	0.00166977	35375	2.37885e-07	458440	TRUE	2.46794e-13
	rs77996260	C	A	C	A	-0.0639	-0.00222754	0.23395	0.200574	FALSE	FALSE	FALSE	TaKp4e	0.00898436	0.804185	outcome	TRUE	reported	textfile	458440	3.693e-11	0.009659	35366	exposure	TRUE	reported	GfHIhy	textfile	2	1	TRUE	0.00123599	43.7636	77.5892	NA	NA	0.00123606	35366	1.3409e-07	458440	TRUE	2.85317e-10
	rs7949566	A	G	A	G	-0.1252	-0.0176929	0.4051	0.421837	FALSE	FALSE	FALSE	TaKp4e	0.00729032	0.0152286	outcome	TRUE	reported	textfile	458440	1.597e-51	0.008291	35370	exposure	TRUE	reported	GfHIhy	textfile	2	1	TRUE	0.00640573	228.019	77.5892	NA	NA	0.00640609	35370	1.28475e-05	458440	TRUE	7.85243e-44
	rs8177398	T	C	T	C	0.1724	0.0317114	0.01817	0.0220389	FALSE	FALSE	FALSE	TaKp4e	0.02444	0.194452	outcome	TRUE	reported	textfile	458440	1.911e-08	0.030677	35375	exposure	TRUE	reported	GfHIhy	textfile	2	1	TRUE	0.000892	31.5809	77.5892	NA	NA	0.00089205	35375	3.67237e-06	458440	TRUE	4.04815e-07
	rs8177399	T	C	T	C	-0.5654	-0.0157219	0.01581	0.0211729	FALSE	FALSE	FALSE	TaKp4e	0.0250177	0.529723	outcome	TRUE	reported	textfile	458440	5.322e-72	0.031509	35376	exposure	TRUE	reported	GfHIhy	textfile	2	1	TRUE	0.00901984	321.972	77.5892	NA	NA	0.00902034	35376	8.61458e-07	458440	TRUE	1.62017e-65
13671_40_ELANE_Elastase	rs10426039	C	G	C	G	-0.1693	-0.00114465	0.45217	0.487598	FALSE	TRUE	TRUE	WdwbXK	0.00719433	0.873587	outcome	TRUE	reported	textfile	458440	3.465e-84	0.008708	35308	exposure	TRUE	reported	bTAaZX	textfile	2	1	FALSE	0.010592	377.966	86.7448	NA	NA	0.0105926	35308	5.52184e-08	458440	TRUE	1.09075e-77
	rs10469327	T	C	T	C	-0.2542	0.00446498	0.07136	0.941595	FALSE	FALSE	FALSE	WdwbXK	0.0153427	0.771038	outcome	TRUE	reported	textfile	458440	3.207e-50	0.017058	35315	exposure	TRUE	reported	bTAaZX	textfile	2	1	TRUE	0.00624904	222.06	86.7448	NA	NA	0.00624939	35315	1.84737e-07	458440	TRUE	3.54956e-46
	rs111376483	TGG	GGG	A	C	0.1074	0.00597463	0.09822	0.134293	TRUE	FALSE	FALSE	WdwbXK	0.0105604	0.571558	outcome	TRUE	reported	textfile	458440	1.568e-13	0.01455	35310	exposure	TRUE	reported	bTAaZX	textfile	2	1	FALSE	0.00154069	54.4826	86.7448	NA	NA	0.00154078	35310	6.98201e-07	458440	TRUE	3.41698e-12
	rs11666067	A	C	A	C	0.0494	0.00109338	0.43007	0.643577	FALSE	FALSE	FALSE	WdwbXK	0.00751229	0.88428	outcome	TRUE	reported	textfile	458440	1.939e-08	0.008794	35320	exposure	TRUE	reported	bTAaZX	textfile	2	1	TRUE	0.000892632	31.5541	86.7448	NA	NA	0.000892682	35320	4.6208e-08	458440	TRUE	7.74245e-08
	rs11666848	T	C	T	C	-0.0782	0.0043813	0.17274	0.214601	FALSE	FALSE	FALSE	WdwbXK	0.00877478	0.617564	outcome	TRUE	reported	textfile	458440	1.019e-11	0.011494	35324	exposure	TRUE	reported	bTAaZX	textfile	2	1	TRUE	0.00130868	46.2857	86.7448	NA	NA	0.00130875	35324	5.43817e-07	458440	TRUE	1.3572e-10
	rs11669180	A	G	A	G	0.1726	-0.0354772	0.06298	0.0425617	FALSE	FALSE	FALSE	WdwbXK	0.0178725	0.0471422	outcome	TRUE	reported	textfile	458440	1.243e-21	0.018065	35312	exposure	TRUE	reported	bTAaZX	textfile	2	1	TRUE	0.00257847	91.2811	86.7448	NA	NA	0.00257862	35312	8.59496e-06	458440	TRUE	4.26461e-18
	rs116838401	T	C	T	C	0.1316	-0.00631137	0.03696	0.0320784	FALSE	FALSE	FALSE	WdwbXK	0.0204033	0.75707	outcome	TRUE	reported	textfile	458440	6.738e-09	0.0227	35311	exposure	TRUE	reported	bTAaZX	textfile	2	1	TRUE	0.000950904	33.6074	86.7448	NA	NA	0.000950958	35311	2.08721e-07	458440	TRUE	3.74355e-08
	rs116855556	T	C	T	C	-0.1289	0.0173723	0.07042	0.0326858	FALSE	FALSE	FALSE	WdwbXK	0.0202202	0.390255	outcome	TRUE	reported	textfile	458440	1.45e-14	0.016758	35352	exposure	TRUE	reported	bTAaZX	textfile	2	1	TRUE	0.00167079	59.1612	86.7448	NA	NA	0.00167088	35352	1.61014e-06	458440	TRUE	7.0033e-13
	rs116872704	T	C	T	C	0.1846	0.0154953	0.01847	0.0133573	FALSE	FALSE	FALSE	WdwbXK	0.0313354	0.620955	outcome	TRUE	reported	textfile	458440	6.538e-09	0.031815	35315	exposure	TRUE	reported	bTAaZX	textfile	2	1	TRUE	0.000952416	33.6647	86.7448	NA	NA	0.000952469	35315	5.33395e-07	458440	TRUE	4.82203e-08
	rs117082297	T	C	T	C	0.128	0.00562235	0.04658	0.032026	FALSE	FALSE	FALSE	WdwbXK	0.0204349	0.783213	outcome	TRUE	reported	textfile	458440	4.734e-10	0.020553	35319	exposure	TRUE	reported	bTAaZX	textfile	2	1	TRUE	0.00109694	38.7833	86.7448	NA	NA	0.00109701	35319	1.65124e-07	458440	TRUE	3.10062e-09
	rs117231919	T	C	T	C	0.2075	0.0173804	0.07069	0.0546626	FALSE	FALSE	FALSE	WdwbXK	0.0158143	0.271755	outcome	TRUE	reported	textfile	458440	1.254e-33	0.017169	35313	exposure	TRUE	reported	bTAaZX	textfile	2	1	TRUE	0.00411926	146.057	86.7448	NA	NA	0.00411949	35313	2.63474e-06	458440	TRUE	7.98973e-30
	rs117778730	G	T	G	T	0.2039	0.065533	0.05015	0.016326	FALSE	FALSE	FALSE	WdwbXK	0.0284587	0.0212936	outcome	TRUE	reported	textfile	458440	2.639e-24	0.020045	35319	exposure	TRUE	reported	bTAaZX	textfile	2	1	TRUE	0.00292108	103.466	86.7448	NA	NA	0.00292125	35319	1.15666e-05	458440	TRUE	4.2785e-20
	rs117821352	A	G	A	G	0.2177	-0.0319385	0.05522	0.041194	FALSE	FALSE	FALSE	WdwbXK	0.018036	0.0765896	outcome	TRUE	reported	textfile	458440	5.66e-30	0.019141	35311	exposure	TRUE	reported	bTAaZX	textfile	2	1	TRUE	0.00364997	129.349	86.7448	NA	NA	0.00365018	35311	6.84014e-06	458440	TRUE	1.07982e-25
	rs118058603	CC	CT	G	A	0.1921	-0.00891035	0.02201	0.0296506	TRUE	FALSE	FALSE	WdwbXK	0.0213516	0.676447	outcome	TRUE	reported	textfile	458440	9.403e-11	0.029662	35302	exposure	TRUE	reported	bTAaZX	textfile	2	1	FALSE	0.00118669	41.9401	86.7448	NA	NA	0.00118676	35302	3.79881e-07	458440	TRUE	8.92183e-10
	rs118092591	AAAA	AAAT	T	A	0.1276	0.0368662	0.03484	0.0289743	TRUE	FALSE	FALSE	WdwbXK	0.0215597	0.087273	outcome	TRUE	reported	textfile	458440	4.697e-08	0.02336	35319	exposure	TRUE	reported	bTAaZX	textfile	2	1	FALSE	0.000844074	29.8353	86.7448	NA	NA	0.000844122	35319	6.37805e-06	458440	TRUE	1.54577e-06
	rs118130273	T	C	T	C	-0.2053	0.00318894	0.01867	0.016651	FALSE	FALSE	FALSE	WdwbXK	0.0281311	0.909745	outcome	TRUE	reported	textfile	458440	1.112e-10	0.031825	35319	exposure	TRUE	reported	bTAaZX	textfile	2	1	TRUE	0.00117685	41.6118	86.7448	NA	NA	0.00117692	35319	2.8031e-08	458440	TRUE	6.23803e-10
	rs12461635	G	A	G	A	0.0771	0.000227415	0.11601	0.0983051	FALSE	FALSE	FALSE	WdwbXK	0.0120758	0.984975	outcome	TRUE	reported	textfile	458440	1.418e-08	0.013595	35310	exposure	TRUE	reported	bTAaZX	textfile	2	1	TRUE	0.000910033	32.1607	86.7448	NA	NA	0.000910085	35310	7.73617e-10	458440	TRUE	4.79555e-08
	rs12903325	G	T	G	T	-0.0735	-0.00431004	0.25867	0.240464	FALSE	FALSE	FALSE	WdwbXK	0.00841618	0.608572	outcome	TRUE	reported	textfile	458440	2.881e-14	0.009667	35359	exposure	TRUE	reported	bTAaZX	textfile	2	1	TRUE	0.00163223	57.8052	86.7448	NA	NA	0.00163232	35359	5.72073e-07	458440	TRUE	6.63263e-13
	rs12973146	GGGGGGGCGGACGCCA	GGCGGGGCGGACGCCA	C	G	-0.0525	-0.00191632	0.417	0.611512	TRUE	FALSE	FALSE	WdwbXK	0.00738208	0.795179	outcome	TRUE	reported	textfile	458440	3.002e-09	0.008851	35312	exposure	TRUE	reported	bTAaZX	textfile	2	1	FALSE	0.000995358	35.1811	86.7448	NA	NA	0.000995414	35312	1.46993e-07	458440	TRUE	1.65122e-08
	rs12978248	G	T	G	A	-0.0565	0.0137938	0.37169	0.438	TRUE	FALSE	FALSE	WdwbXK	0.00733007	0.0598618	outcome	TRUE	reported	textfile	458440	3.622e-10	0.009012	35310	exposure	TRUE	reported	bTAaZX	textfile	2	1	FALSE	0.00111192	39.3034	86.7448	NA	NA	0.00111198	35310	7.72445e-06	458440	TRUE	3.08258e-08
	rs12978944	CTCAGCCTCCCAAAGTGCTGGGATTAC	CTCGGCCTCCCAAAGTGCTGGGATTAC	T	C	0.0476	0.00655137	0.46862	0.481814	TRUE	FALSE	FALSE	WdwbXK	0.00720463	0.363177	outcome	TRUE	reported	textfile	458440	4.332e-08	0.008691	35353	exposure	TRUE	reported	bTAaZX	textfile	2	1	FALSE	0.000847773	29.9951	86.7448	NA	NA	0.000847821	35353	1.80368e-06	458440	TRUE	4.82555e-07
	rs13382133	T	C	T	C	0.0507	0.0071989	0.47336	0.482082	FALSE	FALSE	FALSE	WdwbXK	0.00720518	0.317733	outcome	TRUE	reported	textfile	458440	5.147e-09	0.008678	35353	exposure	TRUE	reported	bTAaZX	textfile	2	1	TRUE	0.000964564	34.1312	86.7448	NA	NA	0.000964619	35353	2.17751e-06	458440	TRUE	8.27455e-08
	rs140165629	ATCTTTAAAAAAAAAAAAAA	GTCTTTAAAAAAAAAAAAAA	T	C	-0.1257	-0.0210284	0.07259	0.056894	TRUE	FALSE	FALSE	WdwbXK	0.0155506	0.176294	outcome	TRUE	reported	textfile	458440	8.408e-14	0.016841	35308	exposure	TRUE	reported	bTAaZX	textfile	2	1	FALSE	0.00157535	55.7071	86.7448	NA	NA	0.00157544	35308	3.98874e-06	458440	TRUE	8.57866e-12
	rs141399595	T	C	T	C	0.3137	0.0154206	0.05745	0.041639	FALSE	FALSE	FALSE	WdwbXK	0.0180409	0.392685	outcome	TRUE	reported	textfile	458440	2.36e-63	0.01867	35315	exposure	TRUE	reported	bTAaZX	textfile	2	1	TRUE	0.00793091	282.303	86.7448	NA	NA	0.00793136	35315	1.59369e-06	458440	TRUE	3.34011e-57
	rs141548740	G	A	G	A	0.128	-0.0273921	0.05881	0.0313945	FALSE	FALSE	FALSE	WdwbXK	0.0206265	0.184177	outcome	TRUE	reported	textfile	458440	5.206e-12	0.018551	35315	exposure	TRUE	reported	bTAaZX	textfile	2	1	TRUE	0.0013463	47.6059	86.7448	NA	NA	0.00134637	35315	3.84696e-06	458440	TRUE	3.13697e-10
	rs142681305	C	T	C	T	0.1201	0.000613905	0.05664	0.0221981	FALSE	FALSE	FALSE	WdwbXK	0.0243155	0.979858	outcome	TRUE	reported	textfile	458440	2.527e-10	0.018987	35318	exposure	TRUE	reported	bTAaZX	textfile	2	1	TRUE	0.00113158	40.0082	86.7448	NA	NA	0.00113164	35318	1.39045e-09	458440	TRUE	1.15055e-09
	rs144153164	T	G	T	G	0.2467	0.0200527	0.01659	0.0154328	FALSE	FALSE	FALSE	WdwbXK	0.0291591	0.491643	outcome	TRUE	reported	textfile	458440	6.111e-14	0.032868	35322	exposure	TRUE	reported	bTAaZX	textfile	2	1	TRUE	0.00159241	56.3336	86.7448	NA	NA	0.0015925	35322	1.03161e-06	458440	TRUE	1.83606e-12
	rs144317085	T	A	T	A	0.114	-0.00107621	0.04354	0.0334013	FALSE	TRUE	FALSE	WdwbXK	0.0200455	0.957183	outcome	TRUE	reported	textfile	458440	4.919e-08	0.020901	35352	exposure	TRUE	reported	bTAaZX	textfile	2	1	TRUE	0.000840807	29.7475	86.7448	NA	NA	0.000840854	35352	6.28752e-09	458440	TRUE	1.60356e-07
	rs144928319	T	G	T	G	-0.1645	-0.000478036	0.05925	0.0750229	FALSE	FALSE	FALSE	WdwbXK	0.0136686	0.972101	outcome	TRUE	reported	textfile	458440	4.374e-19	0.018427	35320	exposure	TRUE	reported	bTAaZX	textfile	2	1	TRUE	0.00225125	79.6889	86.7448	NA	NA	0.00225137	35320	2.66804e-09	458440	TRUE	8.75612e-18
	rs145870849	A	G	A	G	0.1828	0.0684127	0.02223	0.0169957	FALSE	FALSE	FALSE	WdwbXK	0.027789	0.0138217	outcome	TRUE	reported	textfile	458440	1.935e-10	0.028713	35369	exposure	TRUE	reported	bTAaZX	textfile	2	1	TRUE	0.00114466	40.5294	86.7448	NA	NA	0.00114472	35369	1.32203e-05	458440	TRUE	4.39636e-08
	rs147510499	G	C	G	C	0.344	-0.00680626	0.00941	0.00880813	FALSE	TRUE	FALSE	WdwbXK	0.038437	0.859449	outcome	TRUE	reported	textfile	458440	1.65e-14	0.044819	35318	exposure	TRUE	reported	bTAaZX	textfile	2	1	TRUE	0.00166522	58.9071	86.7448	NA	NA	0.00166532	35318	6.83971e-08	458440	TRUE	2.03884e-13
	rs148276867	T	C	T	C	0.1214	0.0339958	0.05561	0.0230684	FALSE	FALSE	FALSE	WdwbXK	0.0239943	0.156533	outcome	TRUE	reported	textfile	458440	2.32e-10	0.019153	35315	exposure	TRUE	reported	bTAaZX	textfile	2	1	TRUE	0.00113635	40.1735	86.7448	NA	NA	0.00113641	35315	4.37877e-06	458440	TRUE	1.01965e-08
	rs149074911	A	G	A	G	0.2641	0.000330097	0.03451	0.0282044	FALSE	FALSE	FALSE	WdwbXK	0.0217226	0.987876	outcome	TRUE	reported	textfile	458440	1.592e-28	0.023839	35311	exposure	TRUE	reported	bTAaZX	textfile	2	1	TRUE	0.00346373	122.726	86.7448	NA	NA	0.00346392	35311	5.03708e-10	458440	TRUE	1.48984e-26
	rs149078772	C	A	C	A	-0.1294	-0.00982214	0.0385	0.0372601	FALSE	FALSE	FALSE	WdwbXK	0.0192698	0.61025	outcome	TRUE	reported	textfile	458440	6.592e-09	0.022306	35322	exposure	TRUE	reported	bTAaZX	textfile	2	1	TRUE	0.000951845	33.6512	86.7448	NA	NA	0.000951899	35322	5.66731e-07	458440	TRUE	4.96644e-08
	rs149993641	A	G	A	G	-0.0934	0.00480338	0.17862	0.151174	FALSE	FALSE	FALSE	WdwbXK	0.01004	0.632349	outcome	TRUE	reported	textfile	458440	1.221e-16	0.011279	35319	exposure	TRUE	reported	bTAaZX	textfile	2	1	TRUE	0.00193777	68.569	86.7448	NA	NA	0.00193788	35319	4.99282e-07	458440	TRUE	4.20738e-15
	rs17604219	A	T	A	T	0.0759	0.01834	0.30442	0.260739	FALSE	TRUE	FALSE	WdwbXK	0.00819921	0.0253	outcome	TRUE	reported	textfile	458440	9.917e-16	0.009455	35314	exposure	TRUE	reported	bTAaZX	textfile	2	1	TRUE	0.00182147	64.4371	86.7448	NA	NA	0.00182157	35314	1.09136e-05	458440	TRUE	9.71462e-13
	rs181485006	C	T	C	T	-0.173	-0.0153839	0.02233	0.0172629	FALSE	FALSE	FALSE	WdwbXK	0.0274913	0.575758	outcome	TRUE	reported	textfile	458440	7.581e-09	0.029944	35310	exposure	TRUE	reported	bTAaZX	textfile	2	1	TRUE	0.000944419	33.3771	86.7448	NA	NA	0.000944472	35310	6.83064e-07	458440	TRUE	6.07924e-08
	rs192057249	A	G	A	G	0.1974	0.00186156	0.02519	0.0265695	FALSE	FALSE	FALSE	WdwbXK	0.0223019	0.933477	outcome	TRUE	reported	textfile	458440	2.677e-12	0.028225	35307	exposure	TRUE	reported	bTAaZX	textfile	2	1	TRUE	0.00138345	48.9105	86.7448	NA	NA	0.00138353	35307	1.51981e-08	458440	TRUE	1.87869e-11
	rs192903199	GGCGGGGGGGT	GGGGGGGGGGT	T	C	-0.1088	-0.567311	0.05633	9.37964e-05	TRUE	FALSE	FALSE	WdwbXK	0.37545	0.130784	outcome	TRUE	reported	textfile	458440	6.095e-09	0.018713	35309	exposure	TRUE	reported	bTAaZX	textfile	2	1	FALSE	0.000956467	33.8023	86.7448	NA	NA	0.000956521	35309	4.9803e-06	458440	TRUE	2.02117e-07
	rs193077512	T	C	T	C	-0.1879	0.0106107	0.01915	0.0158494	FALSE	FALSE	FALSE	WdwbXK	0.0288398	0.712933	outcome	TRUE	reported	textfile	458440	2.068e-09	0.031357	35313	exposure	TRUE	reported	bTAaZX	textfile	2	1	TRUE	0.0010158	35.9054	86.7448	NA	NA	0.00101586	35313	2.95272e-07	458440	TRUE	1.3902e-08
	rs2007647	A	G	A	G	-0.2943	-0.0126786	0.27685	0.244666	FALSE	FALSE	FALSE	WdwbXK	0.0083536	0.12908	outcome	TRUE	reported	textfile	458440	1e-200	0.009561	35316	exposure	TRUE	reported	bTAaZX	textfile	2	1	TRUE	0.0261279	947.435	86.7448	NA	NA	0.0261293	35316	5.02473e-06	458440	TRUE	1.84838e-186
	rs2062422	A	G	A	G	0.0725	-0.00513802	0.27772	0.245635	FALSE	FALSE	FALSE	WdwbXK	0.00835021	0.538345	outcome	TRUE	reported	textfile	458440	6.936e-14	0.009681	35316	exposure	TRUE	reported	bTAaZX	textfile	2	1	TRUE	0.00158553	56.0804	86.7448	NA	NA	0.00158562	35316	8.25878e-07	458440	TRUE	1.79485e-12
	rs2301758	G	C	G	C	0.0596	0.0086537	0.24703	0.217435	FALSE	TRUE	FALSE	WdwbXK	0.00873595	0.321888	outcome	TRUE	reported	textfile	458440	4.236e-09	0.010145	35316	exposure	TRUE	reported	bTAaZX	textfile	2	1	TRUE	0.000976321	34.5115	86.7448	NA	NA	0.000976376	35316	2.14043e-06	458440	TRUE	6.85544e-08
	rs2306718	A	G	A	G	0.0727	-0.00815479	0.25054	0.259313	FALSE	FALSE	FALSE	WdwbXK	0.00822375	0.321385	outcome	TRUE	reported	textfile	458440	3.929e-13	0.010017	35317	exposure	TRUE	reported	bTAaZX	textfile	2	1	TRUE	0.00148923	52.6707	86.7448	NA	NA	0.00148932	35317	2.14489e-06	458440	TRUE	1.74058e-11
	rs2353219	AAGCCCCCCA	AAGCCCCCCG	T	C	0.1016	-0.00846168	0.07154	0.0644588	TRUE	FALSE	FALSE	WdwbXK	0.014647	0.563462	outcome	TRUE	reported	textfile	458440	1.757e-09	0.01688	35316	exposure	TRUE	reported	bTAaZX	textfile	2	1	FALSE	0.00102477	36.2258	86.7448	NA	NA	0.00102483	35316	7.28006e-07	458440	TRUE	1.65993e-08
	rs2380606	C	T	C	T	0.0573	0.000710955	0.47568	0.488303	FALSE	FALSE	FALSE	WdwbXK	0.00721151	0.921467	outcome	TRUE	reported	textfile	458440	2.068e-11	0.008551	35362	exposure	TRUE	reported	bTAaZX	textfile	2	1	TRUE	0.0012682	44.9005	86.7448	NA	NA	0.00126827	35362	2.12007e-08	458440	TRUE	1.28649e-10
	rs2523540	C	G	C	G	0.0531	0.0127154	0.31594	0.341361	FALSE	TRUE	FALSE	WdwbXK	0.00760145	0.0943735	outcome	TRUE	reported	textfile	458440	8.775e-09	0.00923	35440	exposure	TRUE	reported	bTAaZX	textfile	2	1	TRUE	0.000933011	33.0949	86.7448	NA	NA	0.000933063	35440	6.10357e-06	458440	TRUE	3.511e-07
	rs28591229	A	C	A	C	0.2252	-0.0271991	0.02592	0.0195685	FALSE	FALSE	FALSE	WdwbXK	0.0260814	0.297016	outcome	TRUE	reported	textfile	458440	9.017e-17	0.027077	35315	exposure	TRUE	reported	bTAaZX	textfile	2	1	TRUE	0.00195491	69.1689	86.7448	NA	NA	0.00195502	35315	2.37228e-06	458440	TRUE	1.05471e-14
	rs2965290	CGAGCCGGGGGCTGAGTGTGACGGGGAACACCTGTGGCCGAGGCGGGGCTGAGTGCGACGGGGAACACCTGTGGCCGA	CGAGCCGGGGGCTGAGTGTGACGGGGAACACCTGTGGCCGAGGCGGGGCTGAGTGTGACGGGGAACACCTGTGGCCGA	G	A	-0.2209	-0.00618532	0.29621	0.536091	TRUE	FALSE	FALSE	WdwbXK	0.0072473	0.393401	outcome	TRUE	reported	textfile	458440	1.013e-117	0.009577	35313	exposure	TRUE	reported	bTAaZX	textfile	2	1	FALSE	0.0148424	531.995	86.7448	NA	NA	0.0148432	35313	1.58888e-06	458440	TRUE	1.041e-106
	rs34593562	G	A	G	A	-0.0635	-0.000911973	0.40233	0.449445	FALSE	FALSE	FALSE	WdwbXK	0.00723191	0.899649	outcome	TRUE	reported	textfile	458440	8.991e-13	0.008887	35323	exposure	TRUE	reported	bTAaZX	textfile	2	1	TRUE	0.00144329	51.052	86.7448	NA	NA	0.00144337	35323	3.46878e-08	458440	TRUE	7.41175e-12
	rs351103	G	A	G	A	-0.143	-0.0104732	0.34109	0.324861	FALSE	FALSE	FALSE	WdwbXK	0.00769347	0.173414	outcome	TRUE	reported	textfile	458440	6.174e-55	0.00916	35304	exposure	TRUE	reported	bTAaZX	textfile	2	1	TRUE	0.00685598	243.701	86.7448	NA	NA	0.00685636	35304	4.04233e-06	458440	TRUE	1.13815e-48
	rs351984	C	T	C	T	-0.2185	0.0277762	0.06822	0.962322	FALSE	FALSE	FALSE	WdwbXK	0.01887	0.141028	outcome	TRUE	reported	textfile	458440	1.696e-36	0.017318	35311	exposure	TRUE	reported	bTAaZX	textfile	2	1	TRUE	0.00448791	159.178	86.7448	NA	NA	0.00448816	35311	4.72628e-06	458440	TRUE	6.69359e-32
	rs351991	A	G	A	G	0.0832	0.00398042	0.15876	0.162062	FALSE	FALSE	FALSE	WdwbXK	0.00978938	0.684298	outcome	TRUE	reported	textfile	458440	3.636e-12	0.01197	35310	exposure	TRUE	reported	bTAaZX	textfile	2	1	TRUE	0.00136637	48.3096	86.7448	NA	NA	0.00136644	35310	3.60634e-07	458440	TRUE	4.48106e-11
	rs35414347	T	G	T	G	-0.0555	-0.00614498	0.24383	0.287414	FALSE	FALSE	FALSE	WdwbXK	0.0079694	0.440664	outcome	TRUE	reported	textfile	458440	4.655e-08	0.010157	35311	exposure	TRUE	reported	bTAaZX	textfile	2	1	TRUE	0.000844847	29.8559	86.7448	NA	NA	0.000844895	35311	1.29691e-06	458440	TRUE	4.23228e-07
	rs35557848	T	C	T	C	-0.0575	0.00446074	0.24712	0.238836	FALSE	FALSE	FALSE	WdwbXK	0.00844226	0.597235	outcome	TRUE	reported	textfile	458440	7.453e-09	0.009947	35379	exposure	TRUE	reported	bTAaZX	textfile	2	1	TRUE	0.000943617	33.4139	86.7448	NA	NA	0.000943671	35379	6.08997e-07	458440	TRUE	5.71957e-08
	rs35646539	T	C	T	C	0.1313	-0.00519381	0.12883	0.0718229	FALSE	FALSE	FALSE	WdwbXK	0.0139255	0.709171	outcome	TRUE	reported	textfile	458440	3.847e-24	0.012955	35323	exposure	TRUE	reported	bTAaZX	textfile	2	1	TRUE	0.00289959	102.714	86.7448	NA	NA	0.00289975	35323	3.03438e-07	458440	TRUE	4.40494e-22
	rs3746172	C	A	C	A	-0.0898	-0.0249289	0.10461	0.0985396	FALSE	FALSE	FALSE	WdwbXK	0.0121512	0.0402124	outcome	TRUE	reported	textfile	458440	3.162e-10	0.014275	35309	exposure	TRUE	reported	bTAaZX	textfile	2	1	TRUE	0.00111951	39.5709	86.7448	NA	NA	0.00111957	35309	9.18086e-06	458440	TRUE	3.55155e-08
	rs3795063	G	C	G	C	0.0659	0.00381109	0.37972	0.346248	FALSE	TRUE	FALSE	WdwbXK	0.00755732	0.614057	outcome	TRUE	reported	textfile	458440	2.124e-13	0.008977	35314	exposure	TRUE	reported	bTAaZX	textfile	2	1	TRUE	0.0015237	53.887	86.7448	NA	NA	0.00152379	35314	5.5473e-07	458440	TRUE	4.00923e-12
	rs4147911	G	C	G	C	0.1203	0.0231068	0.07742	0.0899247	FALSE	TRUE	FALSE	WdwbXK	0.0125613	0.06584	outcome	TRUE	reported	textfile	458440	9.774e-14	0.016161	35322	exposure	TRUE	reported	bTAaZX	textfile	2	1	TRUE	0.00156628	55.4077	86.7448	NA	NA	0.00156637	35322	7.38119e-06	458440	TRUE	2.41051e-11
	rs41563717	GCCCTGCACATCGACGGAGGGGACGACAC	GCCCTGCACACCGACGGAGGGGACGACAC	A	G	0.2011	0.0270408	0.02716	0.0381468	TRUE	FALSE	FALSE	WdwbXK	0.0187453	0.149151	outcome	TRUE	reported	textfile	458440	1.339e-13	0.027167	35321	exposure	TRUE	reported	bTAaZX	textfile	2	1	FALSE	0.00154894	54.7919	86.7448	NA	NA	0.00154903	35321	4.53912e-06	458440	TRUE	1.53071e-11
	rs45477999	A	G	A	G	-0.224	-0.00847821	0.01263	0.0191377	FALSE	FALSE	FALSE	WdwbXK	0.0262502	0.746713	outcome	TRUE	reported	textfile	458440	1.158e-08	0.039258	35309	exposure	TRUE	reported	bTAaZX	textfile	2	1	TRUE	0.0009212	32.5548	86.7448	NA	NA	0.000921252	35309	2.27542e-07	458440	TRUE	6.27551e-08
	rs4644106	T	C	T	C	0.0568	-0.00183559	0.25981	0.785968	FALSE	FALSE	FALSE	WdwbXK	0.00878177	0.834431	outcome	TRUE	reported	textfile	458440	5.83e-09	0.009757	35439	exposure	TRUE	reported	bTAaZX	textfile	2	1	TRUE	0.000955361	33.8875	86.7448	NA	NA	0.000955415	35439	9.5303e-08	458440	TRUE	2.82802e-08
	rs56185965	A	T	A	T	0.0865	0.00180239	0.15922	0.16512	FALSE	TRUE	FALSE	WdwbXK	0.00969056	0.852449	outcome	TRUE	reported	textfile	458440	7.938e-14	0.011578	35343	exposure	TRUE	reported	bTAaZX	textfile	2	1	TRUE	0.0015768	55.8137	86.7448	NA	NA	0.00157689	35343	7.54604e-08	458440	TRUE	8.86988e-13
	rs56234931	T	C	T	C	0.1365	0.0147601	0.05245	0.0510121	FALSE	FALSE	FALSE	WdwbXK	0.0163513	0.366692	outcome	TRUE	reported	textfile	458440	1.673e-12	0.019336	35317	exposure	TRUE	reported	bTAaZX	textfile	2	1	TRUE	0.00140908	49.8319	86.7448	NA	NA	0.00140916	35317	1.77743e-06	458440	TRUE	5.41215e-11
	rs56236063	C	T	C	T	-0.2445	-0.0616273	0.02776	0.0196209	FALSE	FALSE	FALSE	WdwbXK	0.0258887	0.0172906	outcome	TRUE	reported	textfile	458440	1.328e-20	0.026274	35315	exposure	TRUE	reported	bTAaZX	textfile	2	1	TRUE	0.00244615	86.5926	86.7448	NA	NA	0.00244628	35315	1.23606e-05	458440	TRUE	8.33047e-17
	rs60909820	C	A	C	A	0.0955	0.0114566	0.15868	0.144241	FALSE	FALSE	FALSE	WdwbXK	0.0102401	0.263224	outcome	TRUE	reported	textfile	458440	3.628e-16	0.011717	35312	exposure	TRUE	reported	bTAaZX	textfile	2	1	TRUE	0.00187774	66.4277	86.7448	NA	NA	0.00187785	35312	2.73037e-06	458440	TRUE	4.28776e-14
	rs62132268	G	A	G	T	0.1543	0.0685804	0.10275	0.00579247	TRUE	FALSE	FALSE	WdwbXK	0.0474533	0.148396	outcome	TRUE	reported	textfile	458440	1.792e-26	0.014492	35313	exposure	TRUE	reported	bTAaZX	textfile	2	1	FALSE	0.00319999	113.358	86.7448	NA	NA	0.00320017	35313	4.55601e-06	458440	TRUE	5.7658e-23
	rs62134260	G	T	G	T	0.0852	-0.0122813	0.14455	0.159225	FALSE	FALSE	FALSE	WdwbXK	0.00984744	0.212341	outcome	TRUE	reported	textfile	458440	5.159e-12	0.012346	35311	exposure	TRUE	reported	bTAaZX	textfile	2	1	TRUE	0.00134689	47.6214	86.7448	NA	NA	0.00134696	35311	3.39281e-06	458440	TRUE	2.7086e-10
	rs631822	TCAGCGGGGTGGGGGT	TCAGCGGGGTGGGGGC	A	G	0.0603	0.00685376	0.38006	0.36729	TRUE	FALSE	FALSE	WdwbXK	0.0074713	0.358962	outcome	TRUE	reported	textfile	458440	1.352e-11	0.008916	35310	exposure	TRUE	reported	bTAaZX	textfile	2	1	FALSE	0.0012937	45.7372	86.7448	NA	NA	0.00129378	35310	1.83563e-06	458440	TRUE	3.61001e-10
	rs6510873	A	G	A	G	0.0686	0.0154994	0.33191	0.632746	FALSE	FALSE	FALSE	WdwbXK	0.0074702	0.0380023	outcome	TRUE	reported	textfile	458440	1.106e-13	0.009236	35312	exposure	TRUE	reported	bTAaZX	textfile	2	1	TRUE	0.00155984	55.164	86.7448	NA	NA	0.00155993	35312	9.39033e-06	458440	TRUE	4.10757e-11
	rs6510964	C	T	C	T	0.0907	-0.00172175	0.45602	0.563213	FALSE	FALSE	FALSE	WdwbXK	0.00726351	0.812625	outcome	TRUE	reported	textfile	458440	6.71e-25	0.008802	35309	exposure	TRUE	reported	bTAaZX	textfile	2	1	TRUE	0.00299821	106.176	86.7448	NA	NA	0.00299838	35309	1.22565e-07	458440	TRUE	6.16023e-23
	rs6775011	C	T	C	T	-0.059	0.00201083	0.29896	0.273333	FALSE	FALSE	FALSE	WdwbXK	0.00804198	0.802555	outcome	TRUE	reported	textfile	458440	2.712e-10	0.009344	35363	exposure	TRUE	reported	bTAaZX	textfile	2	1	TRUE	0.00112616	39.867	86.7448	NA	NA	0.00112622	35363	1.36378e-07	458440	TRUE	1.79002e-09
	rs6803805	ATTTTTTTTTTA	TTTTTTTTTTTA	T	A	-0.0816	-0.0122604	0.13657	0.911165	TRUE	FALSE	FALSE	WdwbXK	0.0126075	0.330816	outcome	TRUE	reported	textfile	458440	1.558e-10	0.012751	35363	exposure	TRUE	reported	bTAaZX	textfile	2	1	FALSE	0.00115675	40.9513	86.7448	NA	NA	0.00115682	35363	2.06286e-06	458440	TRUE	3.53488e-09
	rs7247331	A	G	A	G	-0.0949	0.0156729	0.36313	0.368447	FALSE	FALSE	FALSE	WdwbXK	0.00746892	0.0358691	outcome	TRUE	reported	textfile	458440	7.926e-26	0.009031	35312	exposure	TRUE	reported	bTAaZX	textfile	2	1	TRUE	0.00311733	110.417	86.7448	NA	NA	0.0031175	35312	9.60502e-06	458440	TRUE	1.18925e-21
	rs7251247	A	C	A	C	0.1544	0.0043764	0.42145	0.405319	FALSE	FALSE	FALSE	WdwbXK	0.0073762	0.552971	outcome	TRUE	reported	textfile	458440	5.452e-69	0.008795	35316	exposure	TRUE	reported	bTAaZX	textfile	2	1	TRUE	0.00865123	308.176	86.7448	NA	NA	0.00865172	35316	7.6787e-07	458440	TRUE	7.58751e-63
	rs7257836	G	T	G	T	0.0628	0.0126958	0.22448	0.776582	FALSE	FALSE	FALSE	WdwbXK	0.00865318	0.142325	outcome	TRUE	reported	textfile	458440	1.969e-09	0.010466	35317	exposure	TRUE	reported	bTAaZX	textfile	2	1	TRUE	0.00101843	36.0025	86.7448	NA	NA	0.00101849	35317	4.69555e-06	458440	TRUE	7.10948e-08
	rs7260167	C	T	C	T	-0.076	0.00858674	0.47012	0.505465	FALSE	FALSE	FALSE	WdwbXK	0.00720866	0.233587	outcome	TRUE	reported	textfile	458440	1.916e-18	0.008674	35309	exposure	TRUE	reported	bTAaZX	textfile	2	1	TRUE	0.0021695	76.7651	86.7448	NA	NA	0.00216962	35309	3.09504e-06	458440	TRUE	4.62211e-16
	rs72976216	A	T	A	T	-0.0955	-0.00702664	0.07803	0.0808099	FALSE	TRUE	FALSE	WdwbXK	0.0131684	0.593619	outcome	TRUE	reported	textfile	458440	2.837e-09	0.016075	35313	exposure	TRUE	reported	bTAaZX	textfile	2	1	TRUE	0.000998473	35.2923	86.7448	NA	NA	0.000998529	35313	6.21081e-07	458440	TRUE	2.39412e-08
	rs72980285	TGATCCCG	TGACCCCG	A	G	0.066	0.00535266	0.41582	0.388488	TRUE	FALSE	FALSE	WdwbXK	0.00738141	0.468358	outcome	TRUE	reported	textfile	458440	8.875e-14	0.008851	35308	exposure	TRUE	reported	bTAaZX	textfile	2	1	FALSE	0.00157234	55.6005	86.7448	NA	NA	0.00157243	35308	1.14704e-06	458440	TRUE	2.7617e-12
	rs73919845	T	C	T	C	0.1706	0.0102178	0.03756	0.0452622	FALSE	FALSE	FALSE	WdwbXK	0.0173608	0.556158	outcome	TRUE	reported	textfile	458440	1.022e-13	0.022936	35309	exposure	TRUE	reported	bTAaZX	textfile	2	1	TRUE	0.00156443	55.322	86.7448	NA	NA	0.00156452	35309	7.55604e-07	458440	TRUE	2.41985e-12
	rs74520045	T	C	T	C	0.2002	-0.0403594	0.06667	0.0274278	FALSE	FALSE	FALSE	WdwbXK	0.0220662	0.0673969	outcome	TRUE	reported	textfile	458440	3.295e-30	0.01753	35318	exposure	TRUE	reported	bTAaZX	textfile	2	1	TRUE	0.00367932	130.419	86.7448	NA	NA	0.00367953	35318	7.2971e-06	458440	TRUE	7.90538e-26
	rs74692002	T	C	T	C	-0.1669	0.0103872	0.04489	0.046126	FALSE	FALSE	FALSE	WdwbXK	0.0172102	0.546143	outcome	TRUE	reported	textfile	458440	2.886e-15	0.021138	35310	exposure	TRUE	reported	bTAaZX	textfile	2	1	TRUE	0.00176247	62.3391	86.7448	NA	NA	0.00176257	35310	7.94592e-07	458440	TRUE	9.73493e-14
	rs7502514	G	A	G	A	-0.0681	-0.00307356	0.37292	0.611085	FALSE	FALSE	FALSE	WdwbXK	0.00738676	0.677344	outcome	TRUE	reported	textfile	458440	1.553e-14	0.008864	35378	exposure	TRUE	reported	bTAaZX	textfile	2	1	TRUE	0.00166563	59.0215	86.7448	NA	NA	0.00166572	35378	3.77654e-07	458440	TRUE	3.1241e-13
	rs7629791	A	G	A	G	-0.048	-2.14169e-06	0.48633	0.475892	FALSE	FALSE	FALSE	WdwbXK	0.00720869	0.999763	outcome	TRUE	reported	textfile	458440	2.166e-08	0.008574	35361	exposure	TRUE	reported	bTAaZX	textfile	2	1	TRUE	0.000885536	31.3394	86.7448	NA	NA	0.000885586	35361	1.9254e-13	458440	TRUE	6.92089e-08
	rs76428106	C	T	C	T	0.2055	0.00537705	0.01359	0.0130704	FALSE	FALSE	FALSE	WdwbXK	0.031815	0.865789	outcome	TRUE	reported	textfile	458440	3.145e-08	0.03714	35363	exposure	TRUE	reported	bTAaZX	textfile	2	1	TRUE	0.000864998	30.6137	86.7448	NA	NA	0.000865047	35363	6.2308e-08	458440	TRUE	1.25527e-07
	rs78315645	A	G	A	G	-0.0864	0.0124772	0.095	0.104646	FALSE	FALSE	FALSE	WdwbXK	0.0117548	0.288484	outcome	TRUE	reported	textfile	458440	7.639e-09	0.014958	35314	exposure	TRUE	reported	bTAaZX	textfile	2	1	TRUE	0.000943894	33.3623	86.7448	NA	NA	0.000943948	35314	2.45766e-06	458440	TRUE	1.28493e-07
	rs78914045	A	C	A	C	0.2812	0.0170677	0.03848	0.0120986	FALSE	FALSE	FALSE	WdwbXK	0.0329873	0.604874	outcome	TRUE	reported	textfile	458440	1.295e-34	0.022916	35321	exposure	TRUE	reported	bTAaZX	textfile	2	1	TRUE	0.00424495	150.567	86.7448	NA	NA	0.00424519	35321	5.8395e-07	458440	TRUE	1.6716e-31
	rs7969	TCCTGGACCCG	TCCTGGACCCC	C	G	-0.1073	-0.00110942	0.19062	0.198744	TRUE	FALSE	FALSE	WdwbXK	0.00902475	0.902162	outcome	TRUE	reported	textfile	458440	6.356e-22	0.01115	35318	exposure	TRUE	reported	bTAaZX	textfile	2	1	FALSE	0.00261527	92.603	86.7448	NA	NA	0.00261542	35318	3.29641e-08	458440	TRUE	2.56529e-20
	rs79961820	G	A	G	A	0.3594	0.0204823	0.05424	0.0316028	FALSE	FALSE	FALSE	WdwbXK	0.0205936	0.319933	outcome	TRUE	reported	textfile	458440	9.014e-77	0.01938	35316	exposure	TRUE	reported	bTAaZX	textfile	2	1	TRUE	0.00964425	343.894	86.7448	NA	NA	0.00964479	35316	2.1578e-06	458440	TRUE	3.8759e-69
	rs9264681	C	G	C	G	0.0628	-0.0174832	0.35677	0.303777	FALSE	TRUE	FALSE	WdwbXK	0.00781932	0.0253583	outcome	TRUE	reported	textfile	458440	2.228e-12	0.008947	35439	exposure	TRUE	reported	bTAaZX	textfile	2	1	TRUE	0.00138829	49.2652	86.7448	NA	NA	0.00138837	35439	1.09048e-05	458440	TRUE	7.18164e-10
	rs9266059	TGGGCGA	CGGGCGA	A	G	0.0512	-0.0156197	0.33143	0.510926	TRUE	FALSE	FALSE	WdwbXK	0.007201	0.0300746	outcome	TRUE	reported	textfile	458440	1.492e-08	0.009042	35439	exposure	TRUE	reported	bTAaZX	textfile	2	1	FALSE	0.000903934	32.0617	86.7448	NA	NA	0.000903985	35439	1.0263e-05	458440	TRUE	1.09574e-06
	rs9266557	C	G	A	G	0.0627	0.0143084	0.2305	0.084252	TRUE	TRUE	FALSE	WdwbXK	0.0131383	0.276128	outcome	TRUE	reported	textfile	458440	7.066e-10	0.010171	35440	exposure	TRUE	reported	bTAaZX	textfile	2	1	FALSE	0.00107115	38	86.7448	NA	NA	0.00107121	35440	2.58715e-06	458440	TRUE	1.63807e-08
	rs9266834	ATTT	TTTT	T	A	0.0779	-0.013156	0.12489	0.105343	TRUE	FALSE	FALSE	WdwbXK	0.0116933	0.260551	outcome	TRUE	reported	textfile	458440	1.274e-09	0.012832	35439	exposure	TRUE	reported	bTAaZX	textfile	2	1	FALSE	0.00103885	36.8521	86.7448	NA	NA	0.00103891	35439	2.76116e-06	458440	TRUE	2.91531e-08
	rs930232	A	G	A	G	0.063	0.0095843	0.45298	0.458618	FALSE	FALSE	FALSE	WdwbXK	0.00721885	0.184285	outcome	TRUE	reported	textfile	458440	5.306e-13	0.008729	35320	exposure	TRUE	reported	bTAaZX	textfile	2	1	TRUE	0.00147262	52.0868	86.7448	NA	NA	0.00147271	35320	3.84505e-06	458440	TRUE	4.18075e-11
18158_45_CASP8_Caspase_8	rs1047286	A	G	A	G	-0.0523	-0.00842467	0.24066	0.213676	FALSE	FALSE	FALSE	QDGS7d	0.00878656	0.337653	outcome	TRUE	reported	textfile	458440	2.049e-08	0.009326	35372	exposure	TRUE	reported	OUc9RE	textfile	2	1	TRUE	0.000888315	31.4476	59.0151	NA	NA	0.000888365	35372	2.00533e-06	458440	TRUE	2.66202e-07
	rs10801596	A	G	A	G	0.0493	-0.00550491	0.2909	0.675586	FALSE	FALSE	FALSE	QDGS7d	0.00769012	0.474089	outcome	TRUE	reported	textfile	458440	2.396e-08	0.008834	35338	exposure	TRUE	reported	OUc9RE	textfile	2	1	TRUE	0.000880551	31.1426	59.0151	NA	NA	0.000880601	35338	1.11777e-06	458440	TRUE	2.16058e-07
	rs10922094	CATTA	GATTA	G	C	-0.1474	0.0226882	0.40155	0.611612	TRUE	FALSE	FALSE	QDGS7d	0.00739711	0.00216088	outcome	TRUE	reported	textfile	458440	1.183e-73	0.008119	35339	exposure	TRUE	reported	OUc9RE	textfile	2	1	FALSE	0.00924068	329.583	59.0151	NA	NA	0.0092412	35339	2.05204e-05	458440	TRUE	3.26549e-62
	rs114142672	C	A	C	A	0.113	0.0184698	0.05654	0.0784574	FALSE	FALSE	FALSE	QDGS7d	0.0133592	0.166803	outcome	TRUE	reported	textfile	458440	1.986e-10	0.017761	35339	exposure	TRUE	reported	OUc9RE	textfile	2	1	TRUE	0.00114412	40.476	59.0151	NA	NA	0.00114418	35339	4.16947e-06	458440	TRUE	8.44783e-09
	rs11751024	A	C	A	C	0.0574	-0.0141171	0.39789	0.398036	FALSE	FALSE	FALSE	QDGS7d	0.00735743	0.0550149	outcome	TRUE	reported	textfile	458440	1.566e-12	0.008121	35439	exposure	TRUE	reported	OUc9RE	textfile	2	1	TRUE	0.0014077	49.9551	59.0151	NA	NA	0.00140778	35439	8.03072e-06	458440	TRUE	3.09101e-10
	rs12524498	T	G	T	G	0.1152	0.00133307	0.04569	0.0175639	FALSE	FALSE	FALSE	QDGS7d	0.0273388	0.96111	outcome	TRUE	reported	textfile	458440	1.328e-09	0.018997	35441	exposure	TRUE	reported	OUc9RE	textfile	2	1	TRUE	0.00103652	36.7714	59.0151	NA	NA	0.00103658	35441	5.1864e-09	458440	TRUE	5.59792e-09
	rs1337169	C	T	C	T	-0.0541	0.0241146	0.32703	0.683191	FALSE	FALSE	FALSE	QDGS7d	0.00776087	0.00188869	outcome	TRUE	reported	textfile	458440	2.235e-10	0.008527	35336	exposure	TRUE	reported	OUc9RE	textfile	2	1	TRUE	0.00113786	40.2511	59.0151	NA	NA	0.00113793	35336	2.10596e-05	458440	TRUE	1.28543e-07
	rs147906938	A	T	A	T	0.155	-0.0153204	0.03884	0.0208359	FALSE	TRUE	FALSE	QDGS7d	0.0252463	0.54396	outcome	TRUE	reported	textfile	458440	3.307e-14	0.020433	35441	exposure	TRUE	reported	OUc9RE	textfile	2	1	TRUE	0.00162102	57.5406	59.0151	NA	NA	0.00162111	35441	8.03274e-07	458440	TRUE	9.07125e-13
	rs1706435	G	A	G	A	0.0692	-0.00307846	0.36981	0.439746	FALSE	FALSE	FALSE	QDGS7d	0.00725531	0.671344	outcome	TRUE	reported	textfile	458440	5.009e-17	0.008251	35339	exposure	TRUE	reported	OUc9RE	textfile	2	1	TRUE	0.00198647	70.3355	59.0151	NA	NA	0.00198658	35339	3.92712e-07	458440	TRUE	1.65362e-15
	rs17514403	A	G	A	G	-0.1694	-0.00352429	0.02655	0.0233335	FALSE	FALSE	FALSE	QDGS7d	0.0236948	0.881761	outcome	TRUE	reported	textfile	458440	8.918e-12	0.024828	35338	exposure	TRUE	reported	OUc9RE	textfile	2	1	TRUE	0.00131562	46.5499	59.0151	NA	NA	0.00131569	35338	4.82566e-08	458440	TRUE	6.44837e-11
	rs184080912	A	C	A	C	0.1127	-0.0420095	0.045	0.0373916	FALSE	FALSE	FALSE	QDGS7d	0.0187708	0.0252191	outcome	TRUE	reported	textfile	458440	6.788e-09	0.019444	35338	exposure	TRUE	reported	OUc9RE	textfile	2	1	TRUE	0.000949778	33.5933	59.0151	NA	NA	0.000949831	35338	1.09256e-05	458440	TRUE	6.18853e-07
	rs2786107	T	G	T	G	0.0585	-0.00666034	0.22318	0.785763	FALSE	FALSE	FALSE	QDGS7d	0.00879022	0.448631	outcome	TRUE	reported	textfile	458440	1.202e-09	0.009622	35336	exposure	TRUE	reported	OUc9RE	textfile	2	1	TRUE	0.00104498	36.9621	59.0151	NA	NA	0.00104504	35336	1.25231e-06	458440	TRUE	1.56336e-08
	rs3130955	A	C	A	C	0.0471	0.014156	0.31795	0.384382	FALSE	FALSE	FALSE	QDGS7d	0.00740351	0.0558676	outcome	TRUE	reported	textfile	458440	4.189e-08	0.008591	35439	exposure	TRUE	reported	OUc9RE	textfile	2	1	TRUE	0.000847432	30.0559	59.0151	NA	NA	0.00084748	35439	7.97483e-06	458440	TRUE	1.85014e-06
	rs3863087	A	G	A	G	-0.0791	-0.011544	0.09559	0.887071	FALSE	FALSE	FALSE	QDGS7d	0.0113649	0.309746	outcome	TRUE	reported	textfile	458440	9.579e-09	0.013785	35338	exposure	TRUE	reported	OUc9RE	textfile	2	1	TRUE	0.000930878	32.9242	59.0151	NA	NA	0.000930931	35338	2.25061e-06	458440	TRUE	1.46954e-07
	rs5021453	G	A	G	A	0.0501	0.00920758	0.34395	0.372284	FALSE	FALSE	FALSE	QDGS7d	0.00747154	0.217817	outcome	TRUE	reported	textfile	458440	2.797e-09	0.00843	35438	exposure	TRUE	reported	OUc9RE	textfile	2	1	TRUE	0.000995677	35.318	59.0151	NA	NA	0.000995733	35438	3.31275e-06	458440	TRUE	6.86164e-08
	rs61820876	T	G	T	G	-0.0719	0.00511271	0.27768	0.305042	FALSE	FALSE	FALSE	QDGS7d	0.00781531	0.512988	outcome	TRUE	reported	textfile	458440	7.635e-16	0.008921	35337	exposure	TRUE	reported	OUc9RE	textfile	2	1	TRUE	0.00183486	64.954	59.0151	NA	NA	0.00183497	35337	9.33531e-07	458440	TRUE	3.23821e-14
	rs6477	G	C	G	C	0.0792	0.0142201	0.23653	0.0872851	FALSE	TRUE	FALSE	QDGS7d	0.0129963	0.273881	outcome	TRUE	reported	textfile	458440	2.908e-15	0.010032	35439	exposure	TRUE	reported	OUc9RE	textfile	2	1	TRUE	0.00175562	62.3234	59.0151	NA	NA	0.00175572	35439	2.61146e-06	458440	TRUE	2.65528e-13
	rs71631850	G	A	G	A	0.0997	-0.00754893	0.05346	0.0440636	FALSE	FALSE	FALSE	QDGS7d	0.0175216	0.666587	outcome	TRUE	reported	textfile	458440	1.472e-08	0.0176	35336	exposure	TRUE	reported	OUc9RE	textfile	2	1	TRUE	0.000907305	32.0878	59.0151	NA	NA	0.000907356	35336	4.04895e-07	458440	TRUE	9.18355e-08

## Sheet: Supplementary Table S6
Supplementary Table S6: Causal estimates of gut microbiota on osteoarthritis using multiple MR methods
id	nsnp	method	b	se	pvalue	or	or_lci95	or_uci95
GCST90032174	7	MR Egger	-1.26931	1.34872	0.281025	0.0199846	3.95181	0.389851
GCST90032174	7	Weighted median	-0.419005	0.323405	0.657701	0.348932	1.2397	0.195111
GCST90032174	7	Inverse variance weighted	-0.707731	0.322232	0.492761	0.262028	0.926671	0.0280676
GCST90032174	7	Simple mode	-0.260946	0.407348	0.770323	0.346682	1.71165	0.545457
GCST90032174	7	Weighted mode	-0.29862	0.382507	0.741841	0.350522	1.57003	0.46466
GCST90032189	7	MR Egger	0.00732509	0.206356	1.00735	0.672245	1.50951	0.973057
GCST90032189	7	Weighted median	-0.2977	0.0946302	0.742524	0.616822	0.893844	0.00165563
GCST90032189	7	Inverse variance weighted	-0.22304	0.0714664	0.800083	0.695507	0.920382	0.00180291
GCST90032189	7	Simple mode	-0.333593	0.134238	0.716346	0.550626	0.931941	0.0474775
GCST90032189	7	Weighted mode	-0.331785	0.130818	0.717641	0.555332	0.927389	0.0443052
GCST90032254	7	MR Egger	-0.0737892	0.26309	0.928867	0.554635	1.55561	0.79035
GCST90032254	7	Weighted median	0.189746	0.115168	1.20894	0.964657	1.51509	0.0994418
GCST90032254	7	Inverse variance weighted	0.194231	0.0978483	1.21438	1.00245	1.47111	0.0471417
GCST90032254	7	Simple mode	0.102384	0.178033	1.10781	0.781485	1.5704	0.586135
GCST90032254	7	Weighted mode	0.173112	0.163476	1.189	0.863034	1.63808	0.330383
GCST90032282	15	MR Egger	-0.133355	0.0716697	0.875155	0.760463	1.00714	0.0855541
GCST90032282	15	Weighted median	-0.0590819	0.0297736	0.94263	0.889196	0.999275	0.047214
GCST90032282	15	Inverse variance weighted	-0.0519902	0.0238014	0.949338	0.906068	0.994675	0.0289377
GCST90032282	15	Simple mode	-0.0720728	0.042199	0.930463	0.856601	1.01069	0.109718
GCST90032282	15	Weighted mode	-0.076366	0.0407284	0.926477	0.855393	1.00347	0.0818056
GCST90032287	9	MR Egger	-0.0298659	0.127957	0.970576	0.755284	1.24724	0.822125
GCST90032287	9	Weighted median	0.0905716	0.0659932	1.0948	0.961967	1.24598	0.169927
GCST90032287	9	Inverse variance weighted	0.144659	0.0496401	1.15565	1.0485	1.27374	0.00356648
GCST90032287	9	Simple mode	0.0860015	0.10585	1.08981	0.885622	1.34107	0.440021
GCST90032287	9	Weighted mode	0.0667877	0.0936034	1.06907	0.889874	1.28435	0.495811
GCST90032298	8	MR Egger	-0.0841177	0.166955	0.919323	0.662756	1.27521	0.632338
GCST90032298	8	Weighted median	0.0325977	0.0428037	1.03313	0.949996	1.12355	0.446321
GCST90032298	8	Inverse variance weighted	0.0868598	0.0422806	1.09074	1.004	1.18498	0.0399402
GCST90032298	8	Simple mode	0.00744696	0.0651463	1.00747	0.886708	1.14469	0.912201
GCST90032298	8	Weighted mode	0.0209527	0.0478517	1.02117	0.929753	1.12158	0.674675
GCST90032330	7	MR Egger	-0.0105447	0.0966689	0.989511	0.818718	1.19593	0.917381
GCST90032330	7	Weighted median	0.0919525	0.0472489	1.09631	0.999345	1.20269	0.051639
GCST90032330	7	Inverse variance weighted	0.0869259	0.0392259	1.09082	1.01009	1.17799	0.0266893
GCST90032330	7	Simple mode	0.112165	0.0769076	1.1187	0.962161	1.3007	0.194996
GCST90032330	7	Weighted mode	0.105173	0.068268	1.1109	0.971773	1.26995	0.174349
GCST90032331	13	MR Egger	-0.17074	0.153806	0.843041	0.623629	1.13965	0.290633
GCST90032331	13	Weighted median	-0.248022	0.112295	0.780343	0.626179	0.972463	0.027198
GCST90032331	13	Inverse variance weighted	-0.177907	0.0817306	0.837021	0.713125	0.982441	0.0294997
GCST90032331	13	Simple mode	-0.276103	0.178264	0.758735	0.534994	1.07605	0.147377
GCST90032331	13	Weighted mode	-0.272328	0.167707	0.761604	0.548244	1.058	0.130371
GCST90032359	12	MR Egger	0.0498673	0.0974787	1.05113	0.868323	1.27243	0.620057
GCST90032359	12	Weighted median	0.0766985	0.0481831	1.07972	0.982416	1.18665	0.111427
GCST90032359	12	Inverse variance weighted	0.0848968	0.0400437	1.0886	1.00643	1.17749	0.033997
GCST90032359	12	Simple mode	0.050049	0.076586	1.05132	0.904784	1.2216	0.526858
GCST90032359	12	Weighted mode	0.0580922	0.0637363	1.05981	0.935353	1.20083	0.3816
GCST90032371	11	MR Egger	0.0306302	0.146379	1.0311	0.773931	1.37373	0.838911
GCST90032371	11	Weighted median	0.174064	0.0861849	1.19013	1.00515	1.40915	0.0434191
GCST90032371	11	Inverse variance weighted	0.124665	0.061439	1.13277	1.00425	1.27773	0.0424494
GCST90032371	11	Simple mode	0.231964	0.15553	1.26107	0.929718	1.71053	0.1667
GCST90032371	11	Weighted mode	0.254116	0.172943	1.28932	0.918648	1.80956	0.172479
GCST90032396	8	MR Egger	0.683958	0.546403	1.98171	0.679096	5.78292	0.25725
GCST90032396	8	Weighted median	0.411504	0.202743	1.50909	1.01423	2.24539	0.0423893
GCST90032396	8	Inverse variance weighted	0.391059	0.183517	1.47855	1.03186	2.11859	0.0330957
GCST90032396	8	Simple mode	0.607746	0.33958	1.83629	0.943809	3.57271	0.116629
GCST90032396	8	Weighted mode	0.413439	0.322155	1.51201	0.804139	2.84301	0.240217
GCST90032413	11	MR Egger	-0.0167517	0.160976	0.983388	0.717297	1.34819	0.919401
GCST90032413	11	Weighted median	0.137281	0.10872	1.14715	0.926992	1.4196	0.206697
GCST90032413	11	Inverse variance weighted	0.1681	0.0838664	1.18306	1.00373	1.39442	0.0450289
GCST90032413	11	Simple mode	0.0721	0.162229	1.07476	0.782025	1.47708	0.666193
GCST90032413	11	Weighted mode	0.0973512	0.151387	1.10225	0.819249	1.483	0.53465
GCST90032415	13	MR Egger	-0.305744	0.324024	0.736575	0.390303	1.39005	0.365645
GCST90032415	13	Weighted median	-0.0989564	0.131635	0.905782	0.6998	1.17239	0.452203
GCST90032415	13	Inverse variance weighted	-0.190899	0.0973986	0.826216	0.682631	1	0.0499981
GCST90032415	13	Simple mode	-0.16246	0.2366	0.85005	0.534622	1.35158	0.50536
GCST90032415	13	Weighted mode	0.0159521	0.223182	1.01608	0.656072	1.57364	0.944197
GCST90032420	11	MR Egger	-0.0841883	0.0789903	0.919258	0.787408	1.07319	0.314268
GCST90032420	11	Weighted median	-0.0883063	0.0491342	0.91548	0.831429	1.00803	0.0722964
GCST90032420	11	Inverse variance weighted	-0.0856014	0.037279	0.91796	0.853279	0.987544	0.0216623
GCST90032420	11	Simple mode	-0.126893	0.0770955	0.880828	0.757297	1.02451	0.130805
GCST90032420	11	Weighted mode	-0.122522	0.078434	0.884686	0.758621	1.0317	0.149327
GCST90032444	8	MR Egger	-0.14568	0.0776616	0.864434	0.742378	1.00656	0.109787
GCST90032444	8	Weighted median	-0.0608708	0.0447956	0.940945	0.861853	1.02729	0.174192
GCST90032444	8	Inverse variance weighted	-0.0700146	0.0344302	0.93238	0.871536	0.997472	0.0419998
GCST90032444	8	Simple mode	-0.0560229	0.0745138	0.945517	0.817038	1.0942	0.476657
GCST90032444	8	Weighted mode	-0.0583733	0.0739058	0.943298	0.816092	1.09033	0.455543
GCST90032453	4	MR Egger	-0.29308	0.171809	0.745963	0.532685	1.04463	0.230155
GCST90032453	4	Weighted median	-0.0865261	0.0413344	0.917112	0.845741	0.994505	0.036321
GCST90032453	4	Inverse variance weighted	-0.0758478	0.0340187	0.926957	0.867166	0.990871	0.0257747
GCST90032453	4	Simple mode	-0.0961758	0.0576074	0.908304	0.811325	1.01688	0.19361
GCST90032453	4	Weighted mode	-0.0881676	0.0479517	0.915607	0.833474	1.00583	0.163253
GCST90032460	9	MR Egger	-0.212084	0.206529	0.808897	0.539625	1.21254	0.338641
GCST90032460	9	Weighted median	-0.274679	0.084095	0.759816	0.644355	0.895966	0.00108963
GCST90032460	9	Inverse variance weighted	-0.212923	0.0724746	0.808218	0.701192	0.93158	0.00330441
GCST90032460	9	Simple mode	-0.285637	0.122082	0.751536	0.591605	0.954701	0.0474366
GCST90032460	9	Weighted mode	-0.281189	0.114158	0.754886	0.603542	0.94418	0.0391262
GCST90032497	9	MR Egger	-0.101846	0.166617	0.903168	0.651541	1.25197	0.560345
GCST90032497	9	Weighted median	0.106789	0.10549	1.1127	0.904864	1.36827	0.311386
GCST90032497	9	Inverse variance weighted	0.223537	0.10289	1.25049	1.02211	1.5299	0.029812
GCST90032497	9	Simple mode	0.144088	0.184811	1.15499	0.804012	1.65917	0.458037
GCST90032497	9	Weighted mode	0.0949864	0.115713	1.09964	0.876507	1.37959	0.43549
GCST90032544	3	MR Egger	-0.339951	0.518348	0.711805	0.257712	1.96602	0.630464
GCST90032544	3	Weighted median	-0.427036	0.216905	0.65244	0.426489	0.9981	0.0489795
GCST90032544	3	Inverse variance weighted	-0.411496	0.174159	0.662658	0.471023	0.932259	0.0181393
GCST90032544	3	Simple mode	-0.428886	0.247301	0.651234	0.401079	1.05741	0.225008
GCST90032544	3	Weighted mode	-0.431397	0.229591	0.649601	0.414204	1.01878	0.201018
GCST90032545	10	MR Egger	-0.155807	0.225156	0.855724	0.550398	1.33043	0.508522
GCST90032545	10	Weighted median	-0.19278	0.114017	0.824663	0.659513	1.03117	0.0908751
GCST90032545	10	Inverse variance weighted	-0.188668	0.0934156	0.828062	0.689518	0.994442	0.0434185
GCST90032545	10	Simple mode	-0.144444	0.15905	0.865503	0.633698	1.1821	0.387462
GCST90032545	10	Weighted mode	-0.16468	0.136441	0.848165	0.649141	1.10821	0.258211
GCST90032590	9	MR Egger	-0.129766	0.281731	0.878301	0.505626	1.52566	0.659052
GCST90032590	9	Weighted median	-0.194792	0.128004	0.823006	0.640388	1.0577	0.12807
GCST90032590	9	Inverse variance weighted	-0.268343	0.118949	0.764646	0.605632	0.965409	0.0240737
GCST90032590	9	Simple mode	-0.0729105	0.236957	0.929684	0.584297	1.47924	0.766173
GCST90032590	9	Weighted mode	-0.133959	0.201797	0.874626	0.58891	1.29896	0.525463
GCST90032591	6	MR Egger	-0.145517	0.397734	0.864575	0.396501	1.88522	0.732994
GCST90032591	6	Weighted median	-0.440566	0.178029	0.643672	0.45407	0.912443	0.0133353
GCST90032591	6	Inverse variance weighted	-0.326462	0.141401	0.721472	0.546835	0.951881	0.0209567
GCST90032591	6	Simple mode	-0.117459	0.248764	0.889177	0.546054	1.44791	0.656693
GCST90032591	6	Weighted mode	-0.482873	0.246052	0.617008	0.380932	0.999389	0.106947
GCST90032609	4	MR Egger	0.292699	0.195829	1.34004	0.912903	1.96703	0.273614
GCST90032609	4	Weighted median	0.307185	0.121312	1.35959	1.07188	1.72453	0.0113356
GCST90032609	4	Inverse variance weighted	0.294367	0.0933823	1.34228	1.11777	1.61187	0.00162001
GCST90032609	4	Simple mode	0.340411	0.145412	1.40552	1.05697	1.86903	0.101129
GCST90032609	4	Weighted mode	0.327187	0.127454	1.38706	1.08045	1.78068	0.0827013
GCST90032635	7	MR Egger	-0.0206786	0.148473	0.979534	0.732212	1.31039	0.894669
GCST90032635	7	Weighted median	-0.119524	0.0976138	0.887343	0.732826	1.07444	0.220779
GCST90032635	7	Inverse variance weighted	-0.157001	0.0691738	0.854703	0.746334	0.978807	0.023228
GCST90032635	7	Simple mode	0.0065757	0.150056	1.0066	0.750111	1.35079	0.966469
GCST90032635	7	Weighted mode	-0.0313108	0.116436	0.969174	0.771418	1.21763	0.797006
GCST90032639	13	MR Egger	0.52617	0.189066	1.69244	1.16836	2.4516	0.0178081
GCST90032639	13	Weighted median	0.211415	0.131714	1.23542	0.95433	1.59931	0.108472
GCST90032639	13	Inverse variance weighted	0.213877	0.0940054	1.23847	1.03007	1.48903	0.0228966
GCST90032639	13	Simple mode	0.349909	0.172941	1.41894	1.011	1.99147	0.0659027
GCST90032639	13	Weighted mode	0.244916	0.140999	1.27751	0.969047	1.68417	0.10796
GCST90032644	9	MR Egger	-0.0278666	0.0643998	0.972518	0.857195	1.10336	0.678243
GCST90032644	9	Weighted median	-0.0533655	0.0359828	0.948033	0.883475	1.01731	0.138052
GCST90032644	9	Inverse variance weighted	-0.0737189	0.0283186	0.928933	0.878778	0.98195	0.00923587
GCST90032644	9	Simple mode	-0.0239536	0.0541668	0.976331	0.87799	1.08569	0.670042
GCST90032644	9	Weighted mode	-0.0385663	0.0389876	0.962168	0.891382	1.03857	0.35154

## Sheet: Supplementary Table S7
Supplementary Table S7: Causal estimates of pyroptosis-related proteins on osteoarthritis using multiple MR methods
id	nsnp	method	b	se	pvalue	or	or_lci95	or_uci95
13671_40_ELANE_Elastase	74	MR Egger	0.0214415	0.0237475	1.02167	0.975209	1.07035	0.369593
13671_40_ELANE_Elastase	74	Weighted median	0.039766	0.0197595	1.04057	1.00104	1.08166	0.0441673
13671_40_ELANE_Elastase	74	Inverse variance weighted	0.0223051	0.0123393	1.02256	0.998122	1.04759	0.070661
13671_40_ELANE_Elastase	74	Simple mode	0.0282916	0.0356879	1.0287	0.959199	1.10323	0.430492
13671_40_ELANE_Elastase	74	Weighted mode	0.041951	0.0214207	1.04284	0.999966	1.08756	0.0540005
18158_45_CASP8_Caspase_8	17	MR Egger	-0.0206943	0.1565	0.979518	0.72077	1.33115	0.896558
18158_45_CASP8_Caspase_8	17	Weighted median	-0.0491827	0.0543158	0.952007	0.855866	1.05895	0.365203
18158_45_CASP8_Caspase_8	17	Inverse variance weighted	-0.0280593	0.0478804	0.972331	0.885232	1.068	0.557856
18158_45_CASP8_Caspase_8	17	Simple mode	-0.0470902	0.101444	0.954001	0.781985	1.16386	0.648757
18158_45_CASP8_Caspase_8	17	Weighted mode	-0.0524596	0.0867748	0.948893	0.800485	1.12482	0.553956
3037_62_IL1B_IL_1b	26	MR Egger	0.0268556	0.0304902	1.02722	0.96763	1.09048	0.387166
3037_62_IL1B_IL_1b	26	Weighted median	0.0161462	0.0234279	1.01628	0.970666	1.06403	0.490705
3037_62_IL1B_IL_1b	26	Inverse variance weighted	0.00810702	0.0174675	1.00814	0.974209	1.04325	0.642562
3037_62_IL1B_IL_1b	26	Simple mode	-0.0187505	0.0423994	0.981424	0.903162	1.06647	0.662121
3037_62_IL1B_IL_1b	26	Weighted mode	0.0120097	0.0228305	1.01208	0.967792	1.0584	0.603498
3593_72_CASP3_Caspase_3	11	MR Egger	0.0161724	0.084924	1.0163	0.860468	1.20036	0.853195
3593_72_CASP3_Caspase_3	11	Weighted median	-0.00165467	0.0466049	0.998347	0.911193	1.09384	0.971678
3593_72_CASP3_Caspase_3	11	Inverse variance weighted	0.0184508	0.036373	1.01862	0.948531	1.09389	0.611968
3593_72_CASP3_Caspase_3	11	Simple mode	-0.00204962	0.0674183	0.997952	0.874424	1.13893	0.976345
3593_72_CASP3_Caspase_3	11	Weighted mode	-0.00861226	0.0671389	0.991425	0.86918	1.13086	0.900474
4563_61_PLCG1_PLCG1	20	MR Egger	-0.211188	0.0939081	0.809622	0.673513	0.973236	0.0372788
4563_61_PLCG1_PLCG1	20	Weighted median	-0.112213	0.0395225	0.893854	0.827226	0.965848	0.00452256
4563_61_PLCG1_PLCG1	20	Inverse variance weighted	-0.111819	0.0352312	0.894206	0.834542	0.958135	0.00150417
4563_61_PLCG1_PLCG1	20	Simple mode	-2.69e-05	0.101795	0.999973	0.819103	1.22078	0.999792
4563_61_PLCG1_PLCG1	20	Weighted mode	-0.137252	0.0444286	0.87175	0.79905	0.951066	0.00603764
9839_148_TIRAP_Tirap	15	MR Egger	0.0354067	0.0468342	1.03604	0.945172	1.13565	0.463128
9839_148_TIRAP_Tirap	15	Weighted median	0.0305675	0.0359063	1.03104	0.960973	1.10621	0.394595
9839_148_TIRAP_Tirap	15	Inverse variance weighted	0.047009	0.0246341	1.04813	0.998727	1.09998	0.0563534
9839_148_TIRAP_Tirap	15	Simple mode	-0.00115706	0.0634025	0.998844	0.882121	1.13101	0.985697
9839_148_TIRAP_Tirap	15	Weighted mode	0.0171997	0.0440519	1.01735	0.933194	1.10909	0.702087

## Sheet: Supplementary Table S8
Supplementary Table S8: Causal estimates of gut microbiota on PLCG1 using multiple MR methods
id	id2	nsnp	method	b	se	pvalue	or	or_lci95	or_uci95
GCST90032174	4563_61_PLCG1_PLCG1	8	Inverse variance weighted	-0.00100526	0.22079	0.998995	0.648072	1.53994	0.996367
GCST90032189	4563_61_PLCG1_PLCG1	7	Inverse variance weighted	0.0819246	0.105666	1.08537	0.882337	1.33513	0.438155
GCST90032254	4563_61_PLCG1_PLCG1	7	Inverse variance weighted	0.15637	0.0930943	1.16926	0.974243	1.40331	0.0930165
GCST90032282	4563_61_PLCG1_PLCG1	14	Inverse variance weighted	-0.0145453	0.0258018	0.98556	0.936958	1.03668	0.572938
GCST90032287	4563_61_PLCG1_PLCG1	8	Inverse variance weighted	-0.0790536	0.0760806	0.92399	0.795988	1.07258	0.298769
GCST90032298	4563_61_PLCG1_PLCG1	8	Inverse variance weighted	0.0820292	0.0460638	1.08549	0.991778	1.18805	0.0749495
GCST90032330	4563_61_PLCG1_PLCG1	6	Inverse variance weighted	-0.0582302	0.0409599	0.943433	0.870653	1.0223	0.155131
GCST90032331	4563_61_PLCG1_PLCG1	12	Inverse variance weighted	-0.178443	0.0994	0.836572	0.688482	1.01652	0.0726222
GCST90032359	4563_61_PLCG1_PLCG1	11	Inverse variance weighted	0.00947595	0.037161	1.00952	0.938606	1.08579	0.798725
GCST90032371	4563_61_PLCG1_PLCG1	11	Inverse variance weighted	-0.0125509	0.0761621	0.987528	0.850587	1.14651	0.869108
GCST90032396	4563_61_PLCG1_PLCG1	8	Inverse variance weighted	0.118428	0.173614	1.12573	0.801031	1.58203	0.495153
GCST90032413	4563_61_PLCG1_PLCG1	11	Inverse variance weighted	0.001567	0.106171	1.00157	0.813404	1.23326	0.988224
GCST90032415	4563_61_PLCG1_PLCG1	14	Inverse variance weighted	-0.212123	0.0985509	0.808865	0.666788	0.981216	0.0313644
GCST90032420	4563_61_PLCG1_PLCG1	11	Inverse variance weighted	0.101632	0.0470072	1.10698	1.00954	1.21381	0.0306135
GCST90032444	4563_61_PLCG1_PLCG1	8	Inverse variance weighted	-0.000557295	0.0573669	0.999443	0.893154	1.11838	0.992249
GCST90032453	4563_61_PLCG1_PLCG1	5	Inverse variance weighted	-0.0161989	0.0411345	0.983932	0.907717	1.06655	0.693726
GCST90032460	4563_61_PLCG1_PLCG1	9	Inverse variance weighted	-0.0125338	0.0629522	0.987544	0.872912	1.11723	0.842184
GCST90032497	4563_61_PLCG1_PLCG1	8	Inverse variance weighted	0.0300265	0.0916366	1.03048	0.861068	1.23323	0.743162
GCST90032544	4563_61_PLCG1_PLCG1	3	Inverse variance weighted	0.187474	0.217965	1.2062	0.786834	1.84907	0.389729
GCST90032545	4563_61_PLCG1_PLCG1	10	Inverse variance weighted	-0.195034	0.0961506	0.822807	0.681479	0.993443	0.0425172
GCST90032590	4563_61_PLCG1_PLCG1	9	Inverse variance weighted	0.0504263	0.148861	1.05172	0.785573	1.40803	0.734801
GCST90032591	4563_61_PLCG1_PLCG1	7	Inverse variance weighted	0.221753	0.153316	1.24826	0.924273	1.68582	0.148072
GCST90032609	4563_61_PLCG1_PLCG1	4	Inverse variance weighted	0.0220651	0.104257	1.02231	0.83337	1.25409	0.832386
GCST90032635	4563_61_PLCG1_PLCG1	8	Inverse variance weighted	-0.0100311	0.0761317	0.990019	0.852784	1.14934	0.895175
GCST90032639	4563_61_PLCG1_PLCG1	12	Inverse variance weighted	0.105435	0.0990403	1.11119	0.915134	1.34926	0.287073
GCST90032644	4563_61_PLCG1_PLCG1	10	Inverse variance weighted	-0.00456452	0.0269075	0.995446	0.944308	1.04935	0.865295

## Sheet: Supplementary Table S9
Supplementary Table S9. Mediation analysis of the Gordonibacter pamelaeae–PLCG1–OA pathway
Path	Explore → Outcome	Method	β	SE	95% CI
a	GM → PLCG1	IVW	0.101632	0.0470072	(1.009543583-1.213812972)
b	PLCG1 → OA	IVW	-0.111819	0.099	(0.834541773-0.958135242)
c	GM → OA (total effect)	IVW	-0.0856014	0.037279	(0.85327942-0.987543657)
ab	Indirect effect (a × b)	Delta method	-0.0113645	—	—
c'	Direct effect	—	-0.0742369	—	—
—	Meditation proportion	—	0.13276	—	—

## Sheet: Supplementary Table S10
Supplementary Table S10: Primer sequences used for qRT-PCR
Gene	Forward (5'-3')	Reverse (5'-3')
PLCG1	GACAGAGTTTGTGGTGGACAA	CGAAGCGCAGAAAGGCAAAT
NLRP3	ATGTGGGGGAGAATGCCTTG	CCAGAATTCACCAACCCCAGT
CASP1	TGGGACTCTCAGCAGATCAA	TGAGGATGTGGGCATAGCTG
IL1B	GCTCGCCAGTGAAATGATGG	GTCCTGGAAGGAGCACTTCAT
MMP13	CAGTTTGCAGAGCGCTACCT	TTCTCGGAGCCTCTCAGTCA

[truncated: 1 more sheets: Supplementary Table S11]
